# Supplementary material for: A cell-free biosynthesis platform for modular construction of protein glycosylation pathways
Source: PubMed Central journal article supplement (PMC6881289; doi:10.1038/s41467-019-12024-9), 2019-11-27
Supplement: 41467_2019_12024_MOESM1_ESM.pdf [file 41467_2019_12024_MOESM1_ESM.pdf]

## **Supplementary Information**

# **A cell-free biosynthesis platform for modular construction of protein glycosylation pathways**

Kightlinger et al.

## Supplementary Tables

**Supplementary Table 1: Summary of all strains and plasmids used in this study<sup>1-6</sup>.** Plasmid backbone characteristics are listed followed by Uniprot or NCBI identifiers of protein-coding sequences and any modifications or fusion sequences. Annotated protein-coding sequences of all plasmids developed in this study are shown with flanking plasmid sequence contexts in **Supplementary Note 1**.

| Plasmid and Strain          | Relevant Characteristics                                                                                                                                         | Source              |
|-----------------------------|------------------------------------------------------------------------------------------------------------------------------------------------------------------|---------------------|
| <b>Strains</b>              |                                                                                                                                                                  |                     |
| DH5- $\alpha$               | <i>fhuA2</i> $\Delta$ ( <i>argF-lacZ</i> ) <i>U169 phoA glnV44 <math>\Phi</math>80 <math>\Delta</math>(<i>lacZ</i>)M15 gyrA96 recA1 relA1 endA1 thi-1 hsdR17</i> | New England Biolabs |
| C321. $\Delta$ A.759        | MG1655 C321 Derivative                                                                                                                                           | 1                   |
| CLM24. $\Delta$ <i>nanA</i> | W3110 $\Delta$ <i>wecA</i> $\Delta$ <i>nanA</i> $\Delta$ <i>waal::Kan</i>                                                                                        | This Study          |
| <b>Plasmids</b>             |                                                                                                                                                                  |                     |
| pJL1.sfGFP                  | pJL1 plasmid = Kan <sup>R</sup> , <i>P</i> <sub>17</sub> , pBR322 ori; Insert = super folder green fluorescent protein (sfGFP), C-term strep-tag                 | 2                   |
| pJL1.NGT                    | pJL1 plasmid; Insert = <i>A. pleuroneumoniae</i> NGT, (NGT_ACTP2)                                                                                                | 3                   |
| pJL1.AGT                    | pJL1 plasmid; Insert = <i>A. pleuroneumoniae</i> $\alpha$ 1-6 GlcT, (GTF_ACTP7)                                                                                  | 3                   |
| pJL1.Im7-6                  | pJL1 plasmid; Insert = <i>E. coli</i> Im7, (IMM7_ECOLX), 26_31=ATTGGNWTAGG, C-term 6xHis-tag                                                                     | 3                   |
| PJL1.BfGalNAcT              | pJL1 plasmid; Insert = Q5LJ88_BACFN                                                                                                                              | This Study          |
| PJL1.Hp $\beta$ 4GalT       | pJL1 plasmid; Insert = D0IS16_HELP1                                                                                                                              | This Study          |
| PJL1.NmLgtB                 | pJL1 plasmid; Insert = LGTB_NEIMB                                                                                                                                | This Study          |
| PJL1.Bt $\beta$ 4GalT       | pJL1 plasmid; Insert = B4GT1_BOVIN, N-term Strep-tag                                                                                                             | This Study          |
| PJL1.NgLgtB                 | pJL1 plasmid; Insert = Q5F4Y6_NEIG1                                                                                                                              | This Study          |
| PJL1.SpwhcJ                 | pJL1 plasmid; Insert = Q4K235_STREE                                                                                                                              | This Study          |
| PJL1.SpwhcK                 | pJL1 plasmid; Insert = Q4K234_STREE                                                                                                                              | This Study          |
| PJL1.NmLgtC                 | pJL1 plasmid; Insert = Q93EK7_NEIME                                                                                                                              | This Study          |
| PJL1.HsSIAT1                | pJL1 plasmid; Insert = SIAT1_HUMAN                                                                                                                               | This Study          |
| PJL1.PmST3,6                | pJL1 plasmid; Insert = Q15KI8_PASMD, N-Term CAT_Strep-tag_Linker =CSL                                                                                            | This Study          |
| PJL1.CjCST-I                | pJL1 plasmid; Insert = Q9RGF1_CAMJU, N-term CSL                                                                                                                  | This Study          |
| PJL1.CjCST-II               | pJL1 plasmid; Insert = Q9LAK3_CAMJU, N-term CSL                                                                                                                  | This Study          |
| PJL1.SpPvg1                 | pJL1 plasmid; Insert = PVG1_SCHPO, N-term CSL                                                                                                                    | This Study          |
| PJL1.VsST3                  | pJL1 plasmid; Insert = A8R0Y0_9VIBR, N-term CSL                                                                                                                  | This Study          |
| PJL1.HpFutA                 | pJL1 plasmid; Insert = FUCT_HELPX, $\Delta$ 363_478, C-term Strep-tag                                                                                            | This Study          |
| PJL1.HpFutC                 | pJL1 plasmid; Insert = A0A1V0EFK2_HELPX, N-term CSL                                                                                                              | This Study          |
| PJL1.BtGGTA                 | pJL1 plasmid; Insert = GGTA1_BOVIN, $\Delta$ 1_80                                                                                                                | This Study          |
| PJL1.HdGlcNAcT              | pJL1 plasmid; Insert = Q8GNC0_HAEDC                                                                                                                              | This Study          |
| PJL1.NgLgtA                 | pJL1 plasmid; Insert = LgtA_NP274923.1                                                                                                                           | This Study          |
| PJL1.PdST6                  | pJL1 plasmid; Insert = O66375_9GAMM, N-term CSL                                                                                                                  | This Study          |
| PJL1.PIST6                  | pJL1 plasmid; Insert = D0VYB7_PHOLE, N-term CSL                                                                                                                  | This Study          |
| PJL1.PpST3                  | pJL1 plasmid; Insert = A5LHX0_PHOPO                                                                                                                              | This Study          |
| PJL1.H1HA10                 | pJL1 plasmid; Insert = H1HA10 Synthetic Immunogen, N-term His-tag_ATTGGNWTAGG                                                                                    | This Study          |
| pMAF10.NGT                  | pMAF10 plasmid = Trimethylprim <sup>R</sup> , <i>P</i> <sub>BAD</sub> , MOB ori; Insert = NGT_ACTP2, C-term FLAG-tag                                             | 3                   |
| pMAF10.ApNGT.NmLgtB         | pMAF10 plasmid; Insert = NGT_ACTP2, C-term FLAG-tag; LGTB_NEIMB, N-term CSL                                                                                      | This Study          |
| pMAF10.CjCST-I.NmLgtB.ApNGT | pMAF10 plasmid; Insert = Q9RGF1_CAMJU, N-term CSL; LGTB_NEIMB, N-term CSL; NGT_ACTP2, C-term FLAG-tag                                                            | This Study          |
| pMAF10.PdST6.NmLgtB.ApNGT   | pMAF10 plasmid; Insert = O66375_9GAMM, N-term CSL; LGTB_NEIMB, CSL; NGT_ACTP2, C-term FLAG-tag                                                                   | This Study          |
| pBR322.Im7                  | pBR322 plasmid = Carb <sup>R</sup> , <i>P</i> <sub>trc</sub> , pBR322 ori; Insert = IMM7_ECOLX, C-terminal 6xHis-tag                                             | 4                   |
| pBR322.Im7-6                | pBR322 plasmid; Insert = <i>E. coli</i> Im7, (IMM7_ECOLX), 26_31=ATTGGNWTAGG, C-term 6xHis-tag                                                                   | This Study          |
| pBR322.Fc-6                 | pBR322 plasmid; Insert = <i>H. sapiens</i> Fc, IGHG1_HUMAN, Q178_Y183=ATTGGNWTAGG, $\Delta$ 1_98, C-term 6xHis-tag                                               | This Study          |
| pConYCG                     | pConYCG plasmid = CM <sup>R</sup> , <i>P</i> <sub>23109</sub> , rrmB Terminator, p15A ori                                                                        | 5                   |
| pTF                         | pMW07 plasmid = Yeast Recombineering plasmid, Cm <sup>R</sup> , <i>P</i> <sub>BAD</sub> , p15A ori; Insert = galE, pglB, pglA, wbnJ, EcNeuDBAC                   | 6                   |
| pConNeuA                    | pConYCG plasmid, <i>P</i> <sub>23109::P23100 (Constitutive); Insert = B1LECO_ECOSM (EcNeuA)</sub>                                                                | This Study          |

**Supplementary Table 2: Optimization of cell-free protein synthesis of Im7 target and glycosylation enzymes. (a)** CFPS yields of Im7-6 target and enzymes for *in vitro* glycosylation pathways tested by GlycoPRIME. CFPS yields and errors indicate mean and s.d. from n=3 CFPS reactions quantified by [<sup>14</sup>C]-leucine incorporation. All CFPS reactions were incubated for 20 h at the indicated temperatures and conditions. Solubility was calculated from quantification of yields in fractions isolated after centrifugation at 12,000xg for 15 mins. Asterisk (\*) indicates yields when CFPS was conducted under oxidizing conditions. Dotted lines indicate if enzymes were used in biosynthetic pathways with one, two, or more than three GTs. Yields under optimized conditions also shown in **Figs. 2 and 3**. Source data underlying listed average and s.d. values are provided in the **Source Data** file.

| Protein Name | Total Protein Yield in CFPS (µg/mL) |            |            | Protein Solubility in CFPS (%) |          |          | Optimum Temperature (°C) |
|--------------|-------------------------------------|------------|------------|--------------------------------|----------|----------|--------------------------|
|              | 16°C                                | 23°C       | 30°C       | 16°C                           | 23°C     | 30°C     |                          |
| Im7-6        | 107 ± 13                            | 538 ± 26   | 488 ± 51   | 129 ± 30                       | 67 ± 9   | 60 ± 15  | 23                       |
| ApNGT        | 375 ± 41                            | 1420 ± 164 | 1347 ± 208 | 86 ± 11                        | 66 ± 10  | 44 ± 15  | 23                       |
| Apr1-6       | 648 ± 34                            | 1548 ± 155 | 2065 ± 275 | 65 ± 8                         | 57 ± 8   | 32 ± 5   | 23                       |
| NmLgtB       | 240 ± 70                            | 703 ± 50   | 1136 ± 109 | 91 ± 28                        | 89 ± 6   | 59 ± 8   | 23                       |
| Hpβ4GalT     | 339 ± 19                            | 880 ± 129  | 1443 ± 157 | 32 ± 6                         | 3 ± 2    | 4 ± 3    | 16                       |
| Btβ4GalT1    | 222 ± 13                            | 671 ± 39   | 937 ± 120  | 61 ± 6                         | 41 ± 5   | 15 ± 3   | 23                       |
| Btβ4GalT1*   | 187 ± 12                            | 492 ± 76   | 1001 ± 127 | 61 ± 8                         | 31 ± 9   | 15 ± 4   | 23                       |
| NgLgtB       | 447 ± 35                            | 913 ± 36   | 1224 ± 158 | 81 ± 11                        | 97 ± 4   | 89 ± 15  | 30                       |
| SpWchK       | 111 ± 4                             | 365 ± 11   | 625 ± 57   | 68 ± 10                        | 26 ± 3   | 6 ± 1    | 23                       |
| SpWchJ       | 622 ± 24                            | 1814 ± 188 | 1774 ± 140 | 24 ± 2                         | 7 ± 1    | 7 ± 1    | 23                       |
| BfGalNAcT    | 169 ± 15                            | 285 ± 20   | 460 ± 77   | 79 ± 12                        | 68 ± 8   | 55 ± 18  | 23                       |
| BtGGTA       | 247 ± 8                             | 790 ± 16   | 1179 ± 100 | 66 ± 7                         | 20 ± 3   | 30 ± 5   | 30                       |
| NmLgtC       | 125 ± 39                            | 270 ± 67   | 458 ± 16   | 105 ± 44                       | 81 ± 25  | 101 ± 16 | 30                       |
| HdGlcNAcT    | 126 ± 24                            | 377 ± 25   | 772 ± 131  | 87 ± 21                        | 37 ± 4   | 15 ± 4   | 23                       |
| PsPvg1       | 170 ± 9                             | 662 ± 8    | 1600 ± 55  | 89 ± 8                         | 36 ± 1   | 11 ± 2   | 23                       |
| HpFutA       | 575 ± 10                            | 1670 ± 133 | 1852 ± 168 | 39 ± 4                         | 34 ± 4   | 33 ± 8   | 23                       |
| NgLgtA       | 487 ± 13                            | 1199 ± 72  | 2076 ± 36  | 84 ± 9                         | 62 ± 5   | 55 ± 2   | 30                       |
| PdST6        | 242 ± 31                            | 804 ± 48   | 1274 ± 136 | 98 ± 15                        | 86 ± 10  | 68 ± 12  | 23                       |
| HsSIAT1      | 175 ± 21                            | 770 ± 92   | 928 ± 129  | 34 ± 18                        | 3 ± 3    | 5 ± 3    | 16                       |
| HsSIAT1*     | 506 ± 49                            | 674 ± 41   | 637 ± 113  | 30 ± 5                         | 18 ± 3   | 13 ± 3   | 16                       |
| PIST6        | 480 ± 58                            | 1063 ± 160 | 1366 ± 31  | 113 ± 26                       | 102 ± 18 | 117 ± 17 | 30                       |
| CjCST-I      | 343 ± 44                            | 649 ± 63   | 1248 ± 93  | 40 ± 6                         | 37 ± 6   | 44 ± 8   | 16                       |
| CjCST-I*     | 147 ± 16                            | 712 ± 54   | 920 ± 61   | 77 ± 12                        | 17 ± 2   | 12 ± 4   | 16                       |
| VsST3        | 247 ± 55                            | 601 ± 80   | 1044 ± 56  | 102 ± 31                       | 86 ± 18  | 105 ± 10 | 30                       |
| PpST3        | 323 ± 50                            | 738 ± 70   | 1146 ± 143 | 135 ± 33                       | 103 ± 22 | 118 ± 16 | 30                       |
| CjCST-II     | 203 ± 33                            | 674 ± 16   | 1285 ± 143 | 103 ± 20                       | 58 ± 8   | 66 ± 11  | 23                       |
| PmST3,6      | 476 ± 65                            | 1252 ± 187 | 2048 ± 201 | 34 ± 7                         | 17 ± 6   | 6 ± 1    | 23                       |
| HpFutC       | 598 ± 48                            | 1557 ± 69  | 1714 ± 60  | 40 ± 7                         | 18 ± 7   | 1 ± 2    | 16                       |

**Supplementary Table 3: Theoretical glycoprotein and glycopeptide masses for Im7-6 glycoforms produced during GlycoPRIME biosynthetic pathway engineering.** Predicted glycosylation structures are based on previously established GT activities shown in **Figs. 2 and 3** and **Supplementary Table 4**. Theoretical, neutral, and average masses of expected glycoprotein products as well as theoretical, triply charged, monoisotopic mass-to-charge ratios (m/z) of glycopeptides are shown below. Glycopeptide masses correspond to the only ApNGT glycosylation site within Im7-6 which is contained within the tryptic peptide EATTGGNWTAGGDVLDVLEHFVK. Experimentally observed masses are annotated in deconvoluted intact protein MS and glycopeptide MS/MS spectra.

| Target Protein | Predicted Glycan Structure                                             | Biosynthetic Pathway           | Glycoprotein     |        | Glycopeptide    |
|----------------|------------------------------------------------------------------------|--------------------------------|------------------|--------|-----------------|
|                |                                                                        |                                | Theoretical Mass | Charge | Theoretical m/z |
| Im7-6          | None                                                                   | None                           | 11366.43         | 3      | 877.44          |
| Im7-6          | Glcβ-Asn                                                               | ApNGT                          | 11528.48         | 3      | 931.46          |
| Im7-6          | Galβ4Glcβ-Asn                                                          | ApNGT+NmLgtB or NgLgtB         | 11690.53         | 3      | 985.47          |
| Im7-6          | GalNAcβ3Glcβ-Asn                                                       | ApNGT+BfGalNAcT                | 11731.67         | 3      | 999.19          |
| Im7-6          | Glcα6Glcβ-Asn                                                          | ApNGT+Apa1-6                   | 11690.53         | 3      | 985.47          |
| Im7-6          | (Glcα6) <sup>2</sup> Glcβ-Asn                                          | ApNGT+Apa1-6                   | 11852.58         | 3      | 1039.49         |
| Im7-6          | (Glcα6) <sup>3</sup> Glcβ-Asn                                          | ApNGT+Apa1-6                   | 12014.63         | 3      | 1093.51         |
| Im7-6          | (Glcα6) <sup>4</sup> Glcβ-Asn                                          | ApNGT+Apa1-6                   | 12176.68         | 3      | 1147.52         |
| Im7-6          | (Glcα6) <sup>5</sup> Glcβ-Asn                                          | ApNGT+Apa1-6                   | 12338.73         | 3      | 1201.54         |
| Im7-6          | (Glcα6) <sup>6</sup> Glcβ-Asn                                          | ApNGT+Apa1-6                   | 12500.78         | 3      | 1255.56         |
| Im7-6          | (Glcα6) <sup>7</sup> Glcβ-Asn                                          | ApNGT+Apa1-6                   | 12662.83         | 3      | 1309.57         |
| Im7-6          | (Glcα6) <sup>8</sup> Glcβ-Asn                                          | ApNGT+Apa1-6                   | 12824.88         | 3      | 1363.59         |
| Im7-6          | (Glcα6) <sup>9</sup> Glcβ-Asn                                          | ApNGT+Apa1-6                   | 12986.93         | 3      | 1417.61         |
| Im7-6          | (Glcα6) <sup>10</sup> Glcβ-Asn                                         | ApNGT+Apa1-6                   | 13148.98         | 3      | 1471.62         |
| Im7-6          | (Glcα6) <sup>11</sup> Glcβ-Asn                                         | ApNGT+Apa1-6                   | 13311.03         | 3      | 1525.64         |
| Im7-6          | (Glcα6) <sup>12</sup> Glcβ-Asn                                         | ApNGT+Apa1-6                   | 13473.08         | 3      | 1579.66         |
| Im7-6          | PyrGalβ4Glcβ-Asn                                                       | ApNGT+NmLgtB+SpPvg1            | 11760.53         | 3      | 1008.81         |
| Im7-6          | Galβ4(Fuca3)Glcβ-Asn                                                   | ApNGT+NmLgtB+HpFutA            | 11836.59         | 3      | 1034.16         |
| Im7-6          | Fuca2Galβ4Glcβ-Asn                                                     | ApNGT+NmLgtB+HpFutC            | 11836.59         | 3      | 1034.16         |
| Im7-6          | Galα3Galβ4Glcβ-Asn                                                     | ApNGT+NmLgtB+BtGGTA            | 11852.58         | 3      | 1039.49         |
| Im7-6          | Galα4Galβ4Glcβ-Asn                                                     | ApNGT+NmLgtB+NmLgtC            | 11852.58         | 3      | 1039.49         |
| Im7-6          | GlcNAcβ3Galβ4Glcβ-Asn                                                  | ApNGT+NmLgtB+NmLgtA            | 11893.72         | 3      | 1053.20         |
| Im7-6          | Siaα3Galβ4Glcβ-Asn                                                     | ApNGT+NmLgtB+α2,3SiaT          | 11981.63         | 3      | 1082.50         |
| Im7-6          | Siaα6Galβ4Glcβ-Asn                                                     | ApNGT+NmLgtB+α2,6SiaT          | 11981.63         | 3      | 1082.50         |
| Im7-6          | Galβ4GlcNAcβ3Galβ4Glcβ-Asn                                             | ApNGT+NmLgtB+NmLgtA            | 12055.77         | 3      | 1107.22         |
| Im7-6          | (Galβ4GlcNAcβ3) <sup>2</sup> Galβ4Glcβ-Asn                             | ApNGT+NmLgtB+NmLgtA            | 12421.01         | 3      | 1228.97         |
| Im7-6          | (Galβ4GlcNAcβ3) <sup>3</sup> Galβ4Glcβ-Asn                             | ApNGT+NmLgtB+NmLgtA            | 12786.25         | 3      | 1350.71         |
| Im7-6          | (Galβ4GlcNAcβ3) <sup>4</sup> Galβ4Glcβ-Asn                             | ApNGT+NmLgtB+NmLgtA            | 13151.49         | 3      | 1472.46         |
| Im7-6          | (Galβ4GlcNAcβ3) <sup>5</sup> Galβ4Glcβ-Asn                             | ApNGT+NmLgtB+NmLgtA            | 13516.73         | 3      | 1594.21         |
| Im7-6          | Fuca2Galβ4(Fuca3)Glcβ-Asn                                              | ApNGT+NmLgtB+FutA+FutC         | 11982.64         | 3      | 1082.85         |
| Im7-6          | Siaα3Galβ4(Fuca3)Glcβ-Asn                                              | ApNGT+NmLgtB+HpFutA+CjCST-I    | 12127.69         | 3      | 1131.19         |
| Im7-6          | Siaα6(α2Fuc)Galβ4Glcβ-Asn                                              | ApNGT+NmLgtB+HpFutC+PdST6      | 12127.69         | 3      | 1131.19         |
| Im7-6          | Siaα6(α3Sia)Galβ4Glcβ-Asn                                              | ApNGT+NmLgtB+CjCST-I+PdST6     | 12272.72         | 3      | 1179.54         |
| Im7-6          | (Fuca2)(Galβ4GlcNAcβ3)Galβ4Glcβ-Asn                                    | ApNGT+NmLgtB+HpFutC+NmLgtA     | 12201.83         | 3      | 1155.91         |
| Im7-6          | (Fuca2)(Galβ4GlcNAcβ3) <sup>2</sup> Galβ4Glcβ-Asn                      | ApNGT+NmLgtB+HpFutC+NmLgtA     | 12567.07         | 3      | 1277.65         |
| Im7-6          | (Fuca2)(Galβ4GlcNAcβ3) <sup>3</sup> Galβ4Glcβ-Asn                      | ApNGT+NmLgtB+HpFutC+NmLgtA     | 12932.31         | 3      | 1399.40         |
| Im7-6          | (Fuca2)(Galβ4GlcNAcβ3) <sup>4</sup> Galβ4Glcβ-Asn                      | ApNGT+NmLgtB+HpFutC+NmLgtA     | 13297.55         | 3      | 1521.15         |
| Im7-6          | Galβ4(Fuca3)GlcNAcβ3Galβ4(Fuca3)Glcβ-Asn                               | ApNGT+NmLgtB+HpFutA+NmLgtA     | 12347.89         | 3      | 1204.59         |
| Im7-6          | Siaα6Galβ4GlcNAcβ3(Siaα6)Galβ4Glcβ-Asn                                 | ApNGT+NmLgtB+PdST6+NmLgtA      | 12637.96         | 3      | 1301.28         |
| Im7-6          | (Siaα6Galβ4GlcNAcβ3) <sup>2</sup> (Siaα6)Galβ4Glcβ-Asn                 | ApNGT+NmLgtB+PdST6+NmLgtA      | 13294.30         | 3      | 1520.06         |
| Im7-6          | (Siaα6Galβ4GlcNAcβ3) <sup>3</sup> (Siaα6)Galβ4Glcβ-Asn                 | ApNGT+NmLgtB+PdST6+NmLgtA      | 13950.63         | 3      | 1738.84         |
| Im7-6          | Siaα3(Galβ4GlcNAcβ3)Galβ4Glcβ-Asn                                      | ApNGT+NmLgtB+CjCST-I+NmLgtA    | 12346.87         | 3      | 1204.25         |
| Im7-6          | Siaα3(Galβ4GlcNAcβ3) <sup>2</sup> Galβ4Glcβ-Asn                        | ApNGT+NmLgtB+CjCST-I+NmLgtA    | 12712.11         | 3      | 1326.00         |
| Im7-6          | Siaα3(Galβ4GlcNAcβ3) <sup>3</sup> Galβ4Glcβ-Asn                        | ApNGT+NmLgtB+CjCST-I+NmLgtA    | 13077.35         | 3      | 1447.75         |
| Im7-6          | Siaα3(Galβ4GlcNAcβ3) <sup>4</sup> Galβ4Glcβ-Asn                        | ApNGT+NmLgtB+CjCST-I+NmLgtA    | 13442.59         | 3      | 1569.49         |
| Im7-6          | Galβ4(Fuca3)GlcNAcβ3(Siaα6)Galβ4Glcβ-Asn                               | ApNGT+NmLgtB+FutA+PdST6+NmLgtA | 12492.92         | 3      | 1252.94         |
| Im7-6          | (Siaα6)(Fuca2)(Galβ4GlcNAcβ3Galβ4)Glcβ-Asn                             | ApNGT+NmLgtB+FutC+PdST6+NmLgtA | 12492.92         | 3      | 1252.94         |
| Im7-6          | Siaα6(Fuca2)(Galβ4GlcNAcβ3(Siaα6)Galβ4)Glcβ-Asn                        | ApNGT+NmLgtB+FutC+PdST6+NmLgtA | 12784.02         | 3      | 1349.97         |
| Im7-6          | (Siaα6) <sup>2</sup> (Fuca2)(Galβ4GlcNAcβ3) <sup>2</sup> Galβ4Glcβ-Asn | ApNGT+NmLgtB+FutC+PdST6+NmLgtA | 13149.26         | 3      | 1471.72         |

**Supplementary Table 4: Previously characterized activities of glycosyltransferases used this study<sup>7-23</sup>.** GTs listed below were selected for testing in the GlycoPRIME system based on their previously established activities. Many have also been previously used for biosynthesis of glycolipids or free oligosaccharides, laying the foundation for their testing in the new context of elaborating the *N*-linked glucose installed by ApNGT in this study.

| <b>Enzyme</b>     | <b>Organism</b>            | <b>Previously Characterized Activity</b>           | <b>Reference</b> |
|-------------------|----------------------------|----------------------------------------------------|------------------|
| ApNGT             | <i>A. pleuropneumoniae</i> | $\beta$ Glc $\rightarrow$ Asn                      | 7                |
| Ap $\alpha$ 1-6   | <i>A. pleuropneumoniae</i> | ( $\alpha$ 1-6 Glc) <sup>n</sup> $\rightarrow$ Glc | 8                |
| NgLgtB            | <i>N. gonorrhoeae</i>      | $\beta$ 1-4 Gal $\rightarrow$ Glc(Nac)             | 9                |
| Hp $\beta$ 4GalT  | <i>H. pylori</i>           | $\beta$ 1-4 Gal $\rightarrow$ Glc(Nac)             | 10               |
| Bt $\beta$ 4GalT1 | <i>B. taurus</i>           | $\beta$ 1-4 Gal $\rightarrow$ Glc(Nac)             | 11               |
| NmLgtB            | <i>N. meningitidis</i>     | $\beta$ 1-4 Gal $\rightarrow$ Glc(Nac)             | 9                |
| SpWchK            | <i>S. pleuropneumoniae</i> | $\beta$ 1-4 Gal $\rightarrow$ Glc                  | 12               |
| SpWchJ            | <i>S. pleuropneumoniae</i> | WchK enhancer                                      | 12               |
| BfGalNAcT         | <i>B. fragilis</i>         | $\beta$ 1-3 GalNAc $\rightarrow$ Glc               | 13               |
| NgLgtA            | <i>N. gonorrhoeae</i>      | $\beta$ 1-3 GlcNAc $\rightarrow$ Gal               | 14               |
| PsPvg1            | <i>S. pombe</i>            | Pyruvate $\rightarrow$ Gal                         | 16               |
| HpFutA            | <i>H. pylori</i>           | $\alpha$ 1-3 Fuc $\rightarrow$ Glc(Nac)            | 15               |
| HpFutC            | <i>H. pylori</i>           | $\alpha$ 1-2 Fuc $\rightarrow$ Gal                 | 17               |
| NmLgtC            | <i>N. meningitidis</i>     | $\alpha$ 1-4 Gal $\rightarrow$ Gal                 | 17               |
| BtGGTA            | <i>B. taurus</i>           | $\alpha$ 1-3 Glc $\rightarrow$ Glc                 | 18               |
| HsSIAT1           | <i>H. sapiens</i>          | $\alpha$ 2-6 Sia $\rightarrow$ Gal                 | 19               |
| PdST6             | <i>B. taurus</i>           | $\alpha$ 2-6 Sia $\rightarrow$ Gal                 | 20               |
| PIST6             | <i>P. leiognathi</i>       | $\alpha$ 2-6 Sia $\rightarrow$ Gal                 | 21               |
| PmST3,6           | <i>P. multocida</i>        | $\alpha$ 2-3,6 Sia $\rightarrow$ Gal               | 21               |
| VsST3             | <i>V. sp. JT-FAJ-16</i>    | $\alpha$ 2-3 Sia $\rightarrow$ Gal                 | 21               |
| PpST3             | <i>P. phosphoreum</i>      | $\alpha$ 2-3 Sia $\rightarrow$ Gal                 | 21               |
| CjCST-I           | <i>C. jejuni</i>           | $\alpha$ 2-3 Sia $\rightarrow$ Gal                 | 21               |
| CjCST-II          | <i>C. jejuni</i>           | $\alpha$ 2-3,8 Sia $\rightarrow$ Gal               | 22               |
| HdGlcNAcT         | <i>H. ducreyi</i>          | $\beta$ 1-3 GlcNAc $\rightarrow$ Gal               | 23               |

**Supplementary Table 5: Theoretical masses of sugar fragment ions detected in glycopeptide MS/MS spectra.** During MS/MS fragmentation of glycopeptides, diagnostic sugar ions were detected. Theoretical mass to charge ratios of these sugar ions are shown below. All calculations of theoretical m/z assume singly charged ions. All mentions of sialic acid (Sia) in this article refer to *N*-Acetylneuraminic acid (NeuAc).

| <b>Sugar Structure</b>    | <b>Theoretical m/z</b> |
|---------------------------|------------------------|
| HexNAc                    | 204.20                 |
| Sia-H <sub>2</sub> O      | 274.09                 |
| Sia                       | 292.10                 |
| Hex <sup>2</sup>          | 325.11                 |
| HexNAc+Hex                | 366.25                 |
| Hex+Sia                   | 454.15                 |
| Hex <sup>3</sup>          | 487.16                 |
| HexNAc+Hex+Fuc            | 512.31                 |
| Sia <sup>2</sup>          | 583.20                 |
| Hex <sup>4</sup>          | 649.21                 |
| HexNAc+Hex+Sia            | 657.34                 |
| (HexNAc+Hex) <sup>2</sup> | 731.49                 |
| HexNAc+Hex+Fuc+Sia        | 803.40                 |
| (HexNAc+Hex) <sup>3</sup> | 1096.73                |
| (HexNAc+Hex) <sup>4</sup> | 1461.97                |

**Supplementary Table 6: Theoretical glycopeptide masses for H1AH10 synthesized and glycosylated *in vitro*.** Theoretical, doubly charged, monoisotopic mass-to-charge ratios (m/z) of the tryptic peptide containing the *N*-terminal, engineered glycosylation site within H1AH10 which was synthesized and glycosylated a one-pot *in vitro* reaction. Predicted glycosylation structures are based on previously established GT activities shown in **Figs. 2 and 3 and Supplementary Table 4**. Experimentally observed masses are annotated on deconvoluted MS and MS/MS spectra in **Fig. 4 and Supplementary Fig. 14**.

| Target Protein | Glycopeptide Sequence | Predicted Glycan Structure                  | Biosynthetic Pathway | Glycopeptide |                 |
|----------------|-----------------------|---------------------------------------------|----------------------|--------------|-----------------|
|                |                       |                                             |                      | Charge       | Theoretical m/z |
| H1HA10         | ATTGGNWTTAGGK         | None                                        | None                 | 2            | 611.29          |
| H1HA10         | ATTGGNWTTAGGK         | Glc $\beta$ -Asn                            | ApNGT                | 2            | 692.32          |
| H1HA10         | ATTGGNWTTAGGK         | Gal $\beta$ 4Glc $\beta$ -Asn               | ApNGT+NmLgtB         | 2            | 773.34          |
| H1HA10         | ATTGGNWTTAGGK         | Gal $\alpha$ 3Gal $\beta$ 4Glc $\beta$ -Asn | ApNGT+NmLgtB+BtGGTA  | 2            | 854.37          |

**Supplementary Table 7: Theoretical glycoprotein and glycopeptide masses for Fc-6 synthesized and glycosylated in the *E. coli* cytoplasm.** Predicted glycosylation structures are based on previously established GT activities shown in **Figs. 2 and 3 and Supplementary Table 4**. Theoretical, neutral, average masses of expected glycoprotein products and theoretical, triply charged, monoisotopic mass-to-charge ratios (m/z) of glycopeptides are shown below. Glycopeptide masses correspond to the only ApNGT glycosylation site within Fc-6 which is contained within the tryptic peptide EEATTGGNWTTAGGR. Experimentally observed masses are annotated on deconvoluted MS and MS/MS spectra in **Fig. 4 and Supplementary Fig. 15**.

| Target Protein | Predicted Glycan Structure                  | Biosynthetic Pathway | Glycoprotein     |        | Glycopeptide    |
|----------------|---------------------------------------------|----------------------|------------------|--------|-----------------|
|                |                                             |                      | Theoretical Mass | Charge | Theoretical m/z |
| Fc-6           | None                                        | None                 | 27509.09         | 2      | 754.34          |
| Fc-6           | Glc $\beta$ -Asn                            | ApNGT                | 27671.14         | 2      | 835.36          |
| Fc-6           | Gal $\beta$ 4Glc $\beta$ -Asn               | ApNGT+NmLgtB         | 27833.19         | 2      | 916.39          |
| Fc-6           | Sia $\alpha$ 3Gal $\beta$ 4Glc $\beta$ -Asn | ApNGT+NmLgtB+CjCST-I | 28124.29         | 2      | 1061.94         |
| Fc-6           | Sia $\alpha$ 6Gal $\beta$ 4Glc $\beta$ -Asn | ApNGT+NmLgtB+PdST6   | 28124.29         | 2      | 1061.94         |



## Supplementary Figures

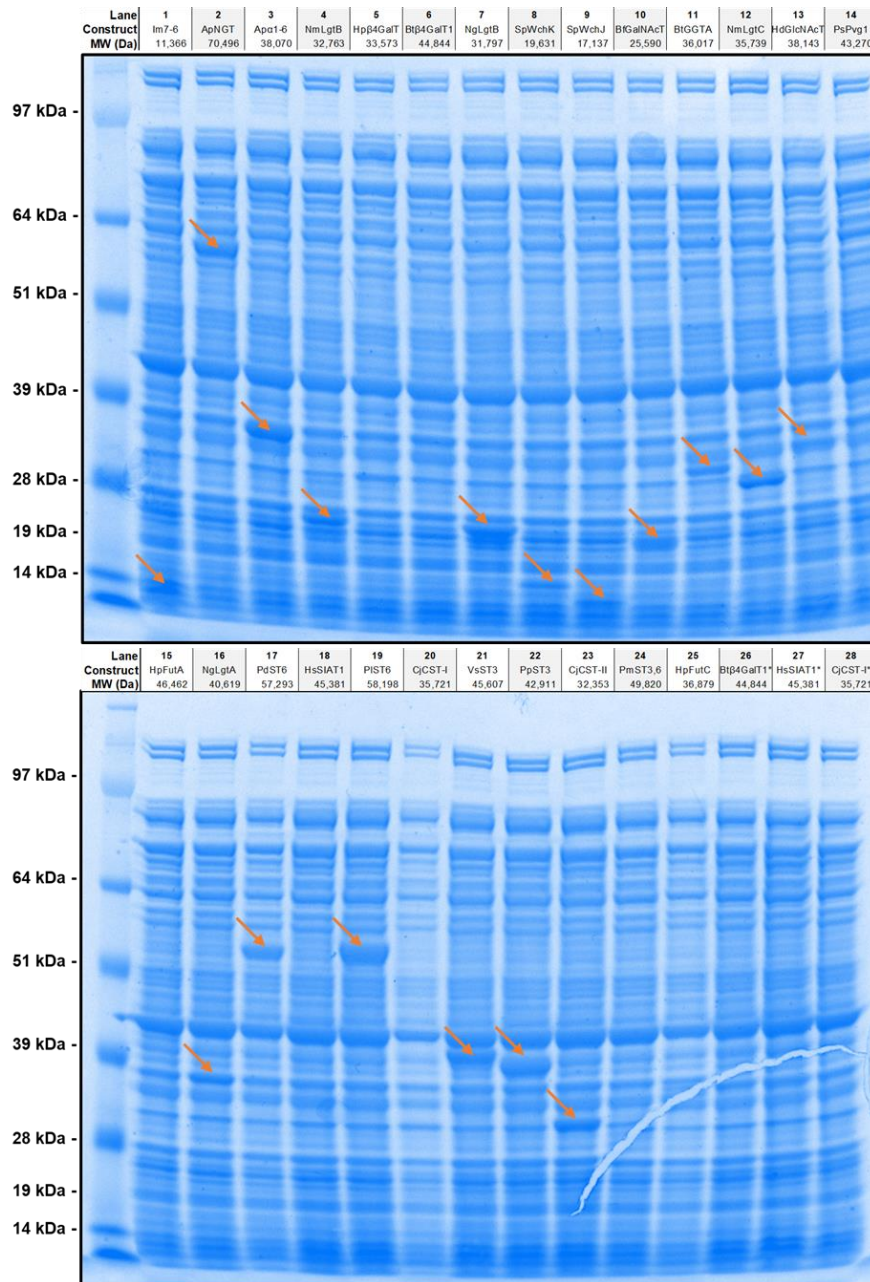

**Supplementary Figure 1: Coomassie-stained protein gels showing CFPS expression of GlycoPRIME target and enzymes.** Coomassie-stained protein gels of the soluble fractions of *E. coli* crude lysate based CFPS reactions following *in vitro* synthesis of Im7-6 target and indicated GlycoPRIME enzymes. Highly enriched proteins are evident from increased band thicknesses near expected molecular weights (arrows), other products can be seen in **Supplementary Fig. 2**. Products from CFPS reactions run under oxidizing conditions indicated by (\*). Soluble samples were isolated by centrifugation at 12,000xg for 15 min at 4°C. Representative of n=2 gels. The same gels were exposed as autoradiograms to determine bands containing [<sup>14</sup>C]-leucine protein (**Supplementary Fig. 2**).

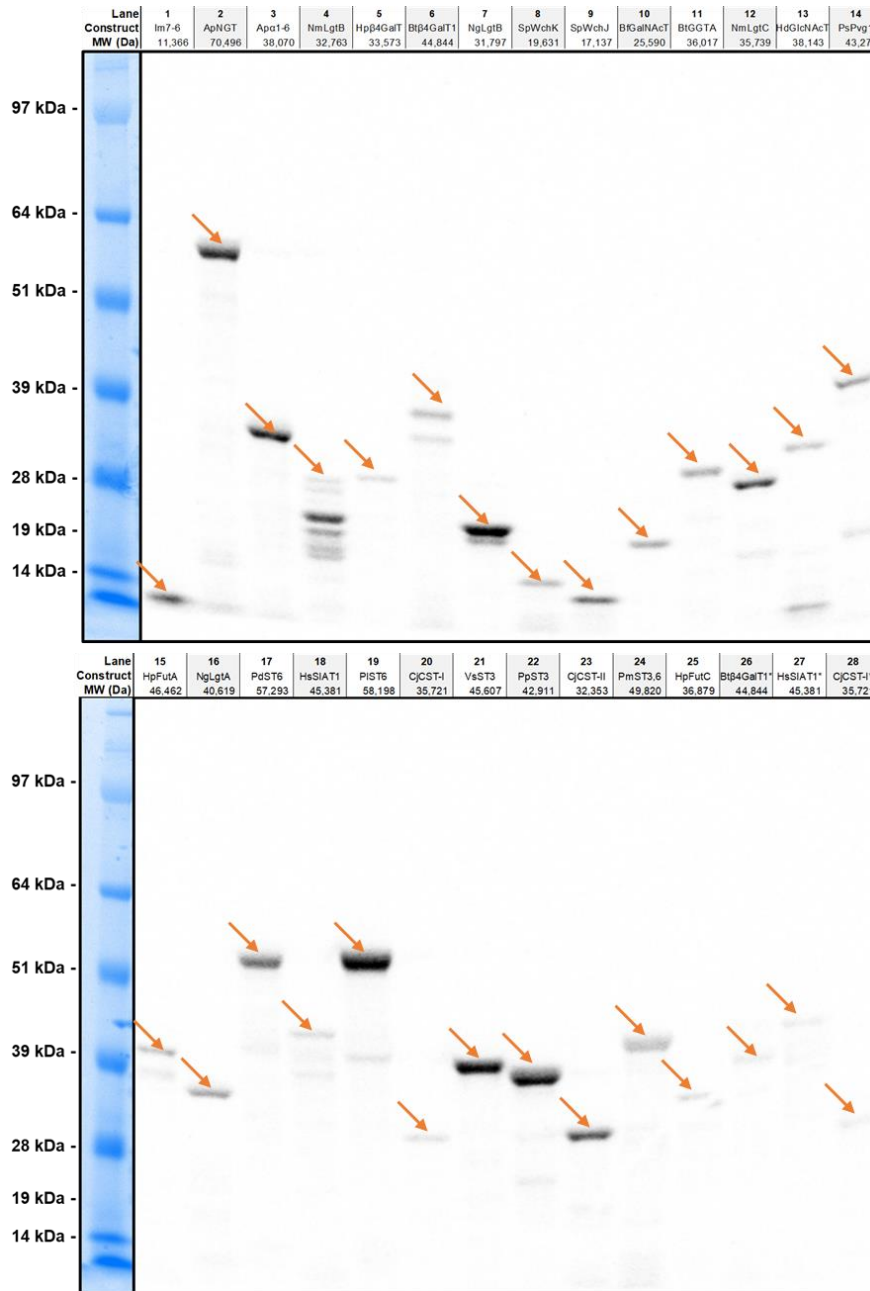

**Supplementary Figure 2: Autoradiograms of protein gels showing CFPS expression of GlycoPRIME target and enzymes in CFPS.** Autoradiograms of protein gels of the soluble fractions of *E. coli* crude lysate based CFPS reactions containing [<sup>14</sup>C]-leucine following *in vitro* synthesis of Im7-6 target and indicated GlycoPRIME enzymes. The presence of bands containing [<sup>14</sup>C]-leucine near expected molecular weights indicate full-length expression of proteins without large truncations (arrows indicate expected full-length product). Products from CFPS reactions run under oxidizing conditions indicated by (\*). Soluble samples were isolated by centrifugation at 12,000xg for 15 min at 4°C. The autoradiograms were generated by exposing a 4-12% SDS-PAGE gel run in MOPS to a phosphoscreen for a 72-h. The autoradiogram is representative of n=2 gels and exposures. The same gels were Coomassie stained (**Supplementary Fig. 1**) and aligned with autoradiogram images for molecular weight standard reference.

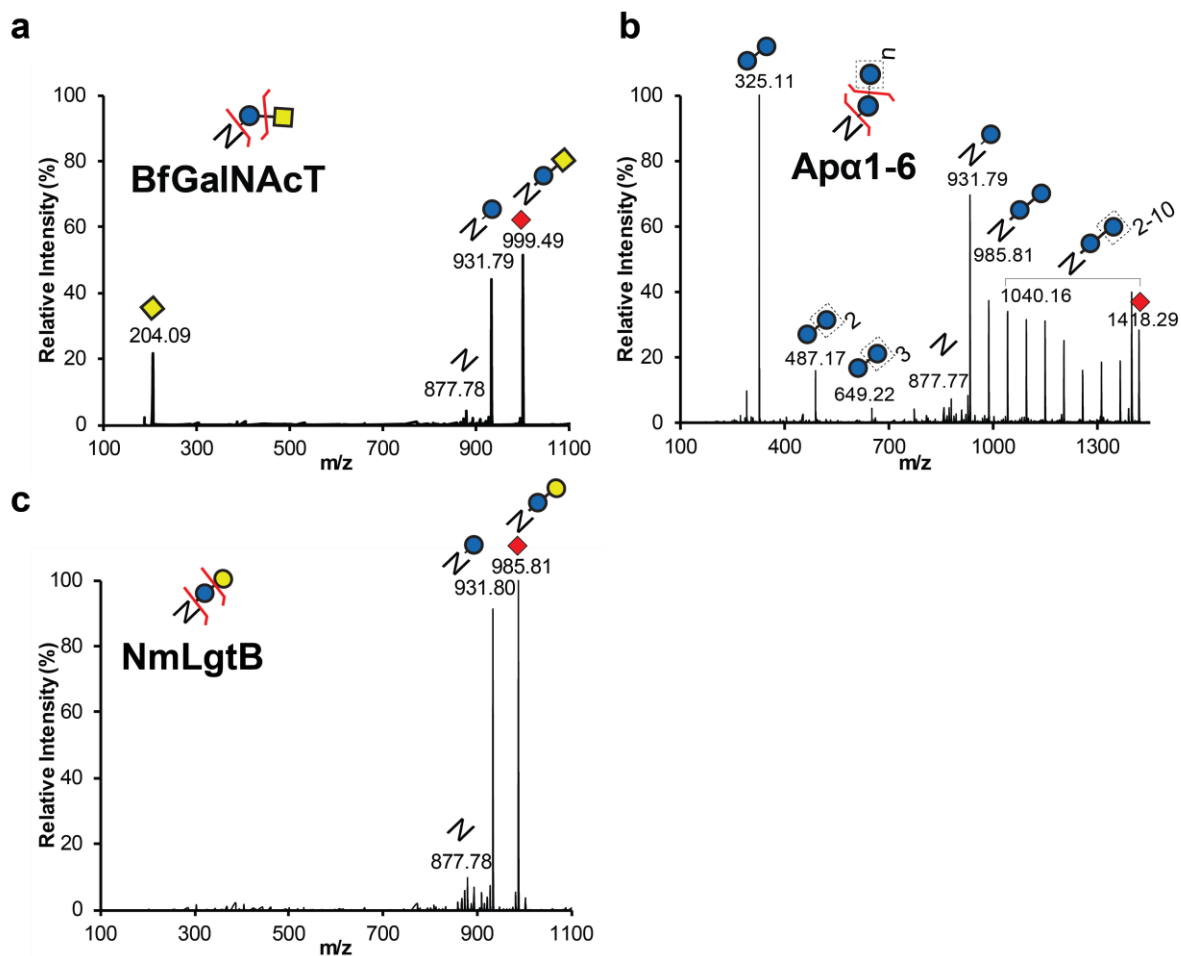

**Supplementary Figure 3: Glycopeptide MS/MS spectra of GlycoPRIME reaction products from two enzyme biosynthetic pathways elaborating *N*-linked glucose.** Products from IVG reactions containing two enzyme pathways modifying Im7-6 shown in **Fig. 2** were purified, trypsinized, and analyzed by pseudo Multiple Reaction Monitoring (MRM) MS/MS fragmentation at theoretical glycopeptide masses (red diamonds) corresponding to detected protein MS peaks using a collisional energy of 30 eV (see **Methods**). Spectra representative of many MS/MS acquisitions from  $n=1$  IVG reaction. Theoretical protein, peptide, and sugar ion masses derived from expected glycosylation structures are shown in **Supplementary Tables 3 and 5**. All indicated sugar ions are singly charged and glycopeptide fragmentation products are triply charged ions consistent with modification of Im7-6 tryptic peptide EATTGGNWTTAGGDVLDVLEHFVK with indicated sugar structures. **(a)** MS/MS spectra of  $999.49 \pm 2$  m/z corresponding to the peptide modified with *N*-linked GalNAc $\beta$ 1-3Glc installed by ApNGT and BfGalNAcT. **(b)** MS/MS spectra of  $1418.29 \pm 2$  m/z corresponding to the peptide modified with an *N*-linked dextran polymer installed by ApNGT and Apa1-6. **(c)** MS/MS spectra of  $985.81 \pm 2$  m/z corresponding to the peptide modified with *N*-linked lactose installed by ApNGT and NmLgtB. All IVG reactions contained Im7-6, ApNGT, and appropriate sugar donors according to established enzyme activities (**Supplementary Table 4**).

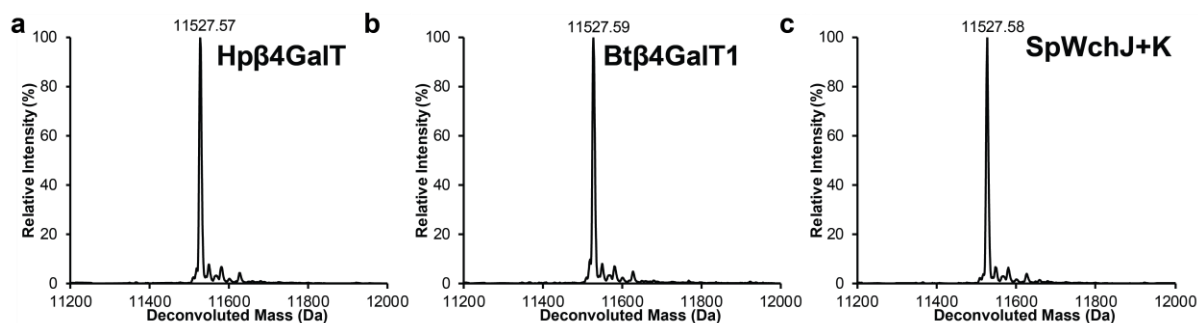

**Supplementary Figure 4: Deconvoluted intact protein MS spectra of IVG reaction products showing no modification of *N*-linked glucose installed by ApNGT.** Products of IVG reactions containing 10  $\mu\text{M}$  Im7-6, 0.4  $\mu\text{M}$  ApNGT, 2.5 mM of appropriate sugar donors, and one elaborating GT were purified and analyzed by intact protein MS (see **Methods**). **(a)** Deconvoluted intact protein MS spectra of IVG containing 1.3  $\mu\text{M}$  of Hp $\beta$ 4GalT. **(b)** Deconvoluted intact protein MS spectra of IVG containing 1.4  $\mu\text{M}$  of Bt $\beta$ 4GalT1 supplemented with 10  $\mu\text{M}$   $\alpha$ -lactalbumin and performed under oxidizing conditions (see **Methods**). **(c)** Deconvoluted intact protein MS spectra of IVG containing 1.5  $\mu\text{M}$  of SpWchJ and 1.0  $\mu\text{M}$  of SpWchK. No peaks were detected that indicated the modification of Im7-6 with *N*-linked glucose installed by ApNGT (theoretical mass values shown in **Supplementary Table 3**). Spectra from  $m/z$  100-2000 were deconvoluted into 11,000-14,000 Da using Bruker Compass Data Analysis maximum entropy method. Deconvoluted spectra shown here are representative of  $n=2$  IVG reactions.

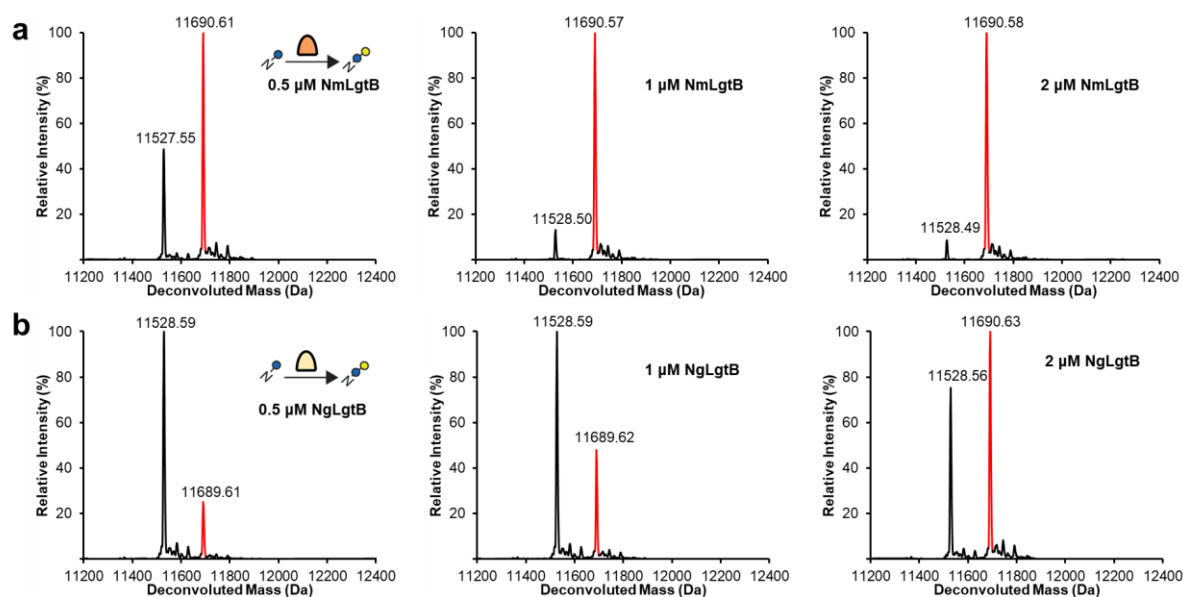

**Supplementary Figure 5: Optimization of LgtB homolog and concentration.** Products of IVG reactions containing 10  $\mu\text{M}$  Im7-6, 0.4  $\mu\text{M}$  ApNGT, 2.5 mM of appropriate sugar donors, and indicated concentrations of NmLgtB or NgLgtB were purified and analyzed by intact protein MS (see **Methods**). **(a)** Deconvoluted intact protein MS spectra from IVG reactions containing indicated concentrations of NmLgtB. **(b)** Deconvoluted intact protein MS spectra from IVG reactions containing indicated concentrations of NgLgtB. Results representative of  $n=2$  IVG reactions conducted for 24 h at 30°C indicate that NmLgtB produced in CFPS has greater specific activity and that nearly homogeneous *N*-linked lactose can be obtained with 2  $\mu\text{M}$  NmLgtB. Theoretical mass values shown in **Supplementary Table 3**. All spectra were acquired from full elution peak areas of all detected glycosylated and aglycosylated Im7-6 species and were deconvoluted from  $m/z$  100-2000 into 11,000-14,000 Da using Bruker Bruker Compass Data Analysis maximum entropy method.

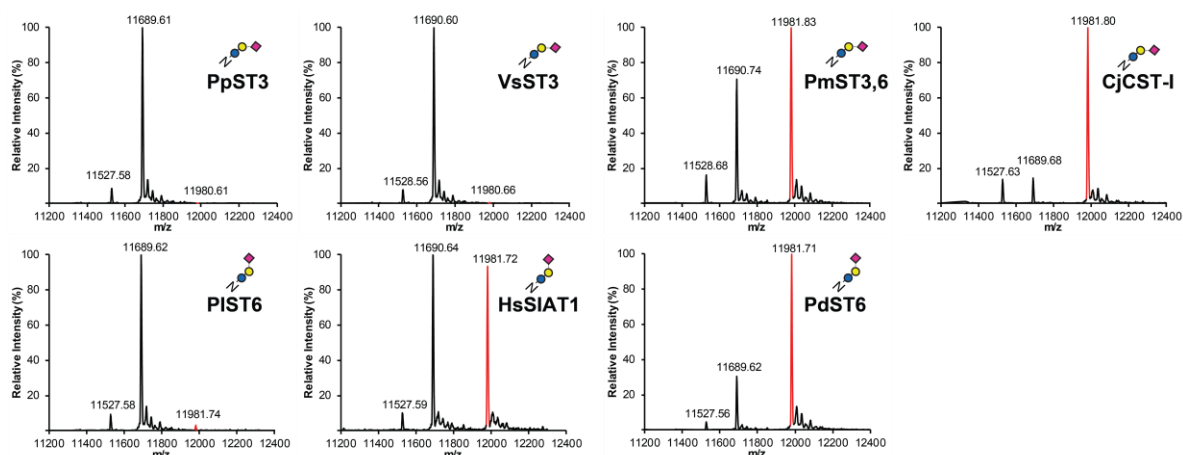

**Supplementary Figure 6: Optimization of sialyltransferase homologs.** Deconvoluted intact protein MS spectra representative of  $n=2$  IVG reactions containing  $0.4 \mu\text{M}$  ApNGT,  $2 \mu\text{M}$  NmLgtB, each sialyltransferase shown in **Fig. 3**, and  $2.5 \text{ mM}$  each of UDP-Glc, UDP-Gal, and CMP-Sia. Lysates enriched with sialyltransferases by CFPS were added with equal volumes to each IVG reaction such that each  $32 \mu\text{l}$ -IVG reaction contained a total of  $25 \mu\text{l}$  of CFPS lysates. These reactions contained  $12.9 \mu\text{M}$  PpST3;  $9.8 \mu\text{M}$  VsST3;  $1.8 \mu\text{M}$  PmST3,6;  $1.3 \mu\text{M}$  CjCST-I;  $5.6 \mu\text{M}$  PIST6;  $0.7 \mu\text{M}$  of HsSIAT1; and  $4.9 \mu\text{M}$  PdST6, based on CFPS yields shown in **Supplementary Table 2**. CjCST-I and HsSIAT1 were synthesized in CFPS with oxidizing conditions because they were found to be more active when produced in this way (**Supplementary Fig. 9**). Under the conditions above, the reaction containing PdST6 provided the most efficient conversion to 6'-sialylactose and the reaction containing CjCST-I provided the most efficient conversion to 3'-sialylactose (exoglycosidase digestions to confirm linkages are shown in **Supplementary Fig. 10**). Although only trace amounts appear in PpST6 and VsST3, MS/MS detection and identification shows that these enzymes are functional (**Supplementary Fig. 7**). All spectra were acquired from full elution peak areas of all detected glycosylated and aglycosylated Im7-6 species and were deconvoluted from  $m/z$  100-2000 into 11,000-14,000 Da using Bruker Compass Data Analysis maximum entropy method.



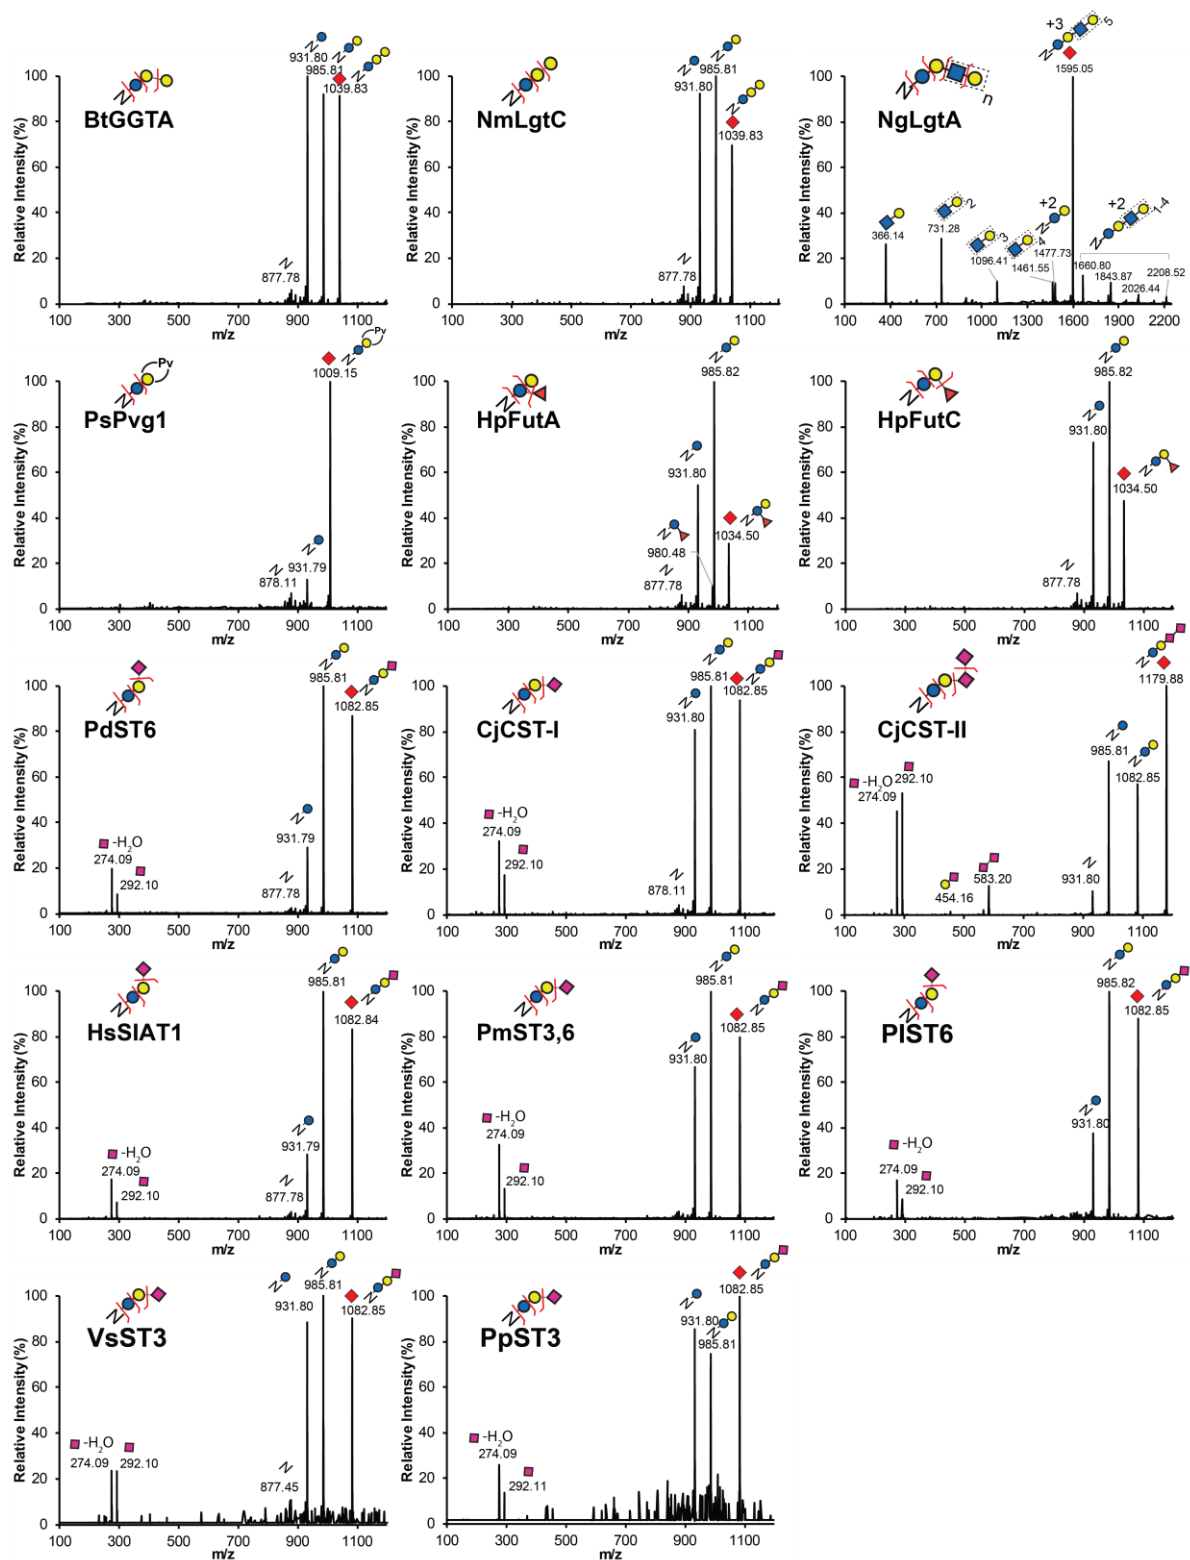

**Supplementary Figure 7: Glycopeptide MS/MS spectra of GlycoPRIME reaction products from three enzyme biosynthetic pathways elaborating N-linked lactose.** Products from IVG reactions containing three enzyme pathways modifying Im7-6 shown in **Fig. 3** were purified, trypsinized, and analyzed by pseudo MRM MS/MS fragmentation at theoretical glycopeptide masses (indicated by red diamonds) corresponding to detected

protein MS peaks in **Fig. 3 and Supplementary Fig. 6**. All glycopeptides were fragmented using a collisional energy of 30 eV with a window of  $\pm 2$  m/z from targeted m/z values (see **Methods**). Spectra are representative of many MS/MS acquisitions from n=1 IVG reaction. Theoretical protein, peptide, and sugar ion masses derived from expected glycosylation structures are shown in **Supplementary Tables 3 and 5**. All indicated sugar ions are singly charged and glycopeptide fragmentation products are triply charged ions consistent with modification of Im7-6 tryptic peptide EATTGGNWTTAGGDVLDVLEHFVK with indicated sugar structures. Predicted sugar linkages based on previously established GT activities (**Supplementary Table 4**) and exoglycosidase sequencing (**Supplementary Figs. 10 and 11**). All IVG reactions contained Im7-6, ApNGT, NmLgtB, indicated GTs, and appropriate sugar donors according to established GT activities.



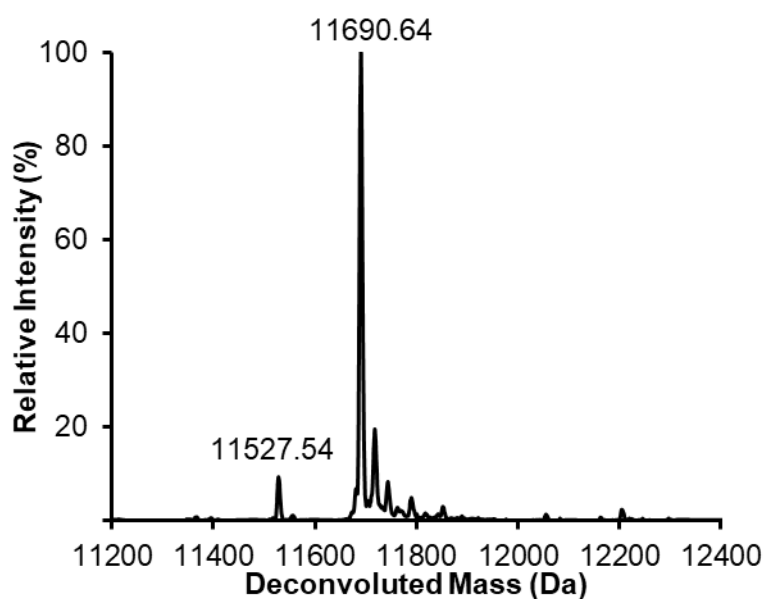

**Supplementary Figure 8: HdGlcNAcT does not modify the *N*-linked lactose substrate installed by ApNGT and NmLgtB.** Deconvoluted intact protein MS spectra of IVG reaction product containing 10  $\mu$ M Im7-6, 0.4  $\mu$ M ApNGT, 2  $\mu$ M NmLgtB, 1.5  $\mu$ M HdGlcNAcT, and 2.5 mM of UDP-Glc, UDP-Gal, and UDP-GlcNAc. No peaks were detected that indicated the modification of Im7-6 with *N*-linked lactose installed by ApNGT and NmLgtB (see **Supplementary Table 3** for theoretical mass values). Deconvoluted spectra representative of  $n=2$  IVG reactions.

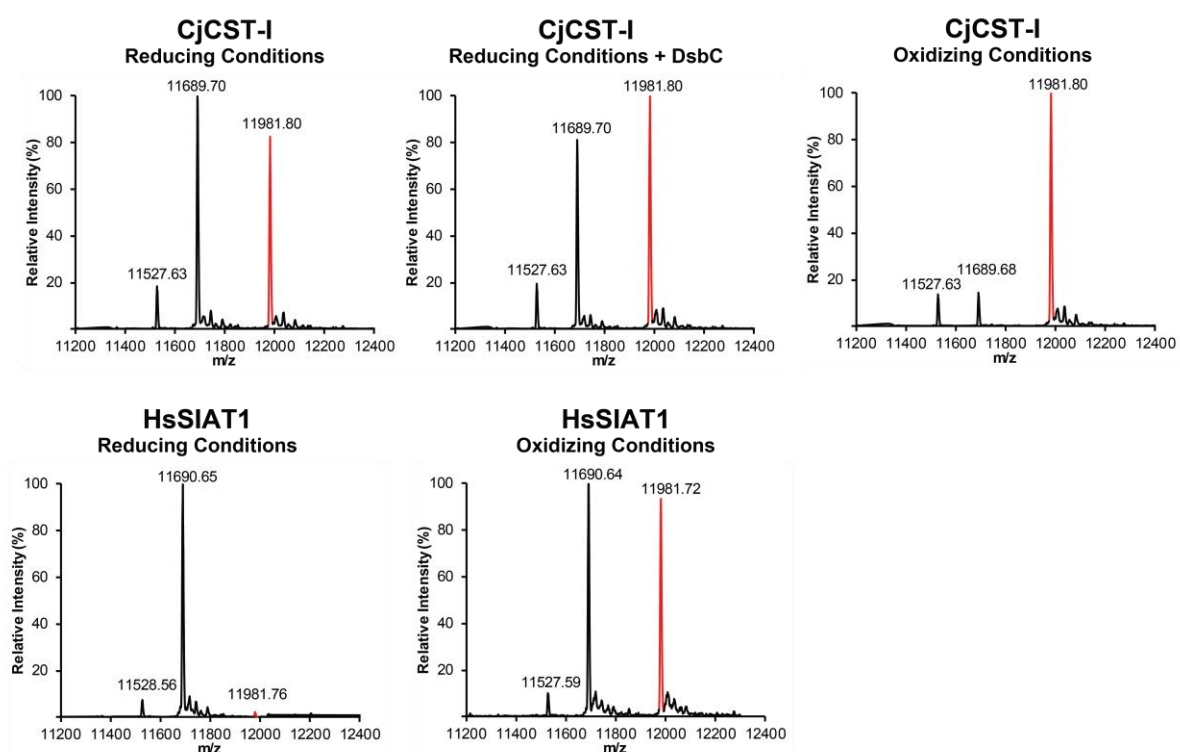

**Supplementary Figure 9: CjCST-I and HsSIAT1 exhibit greater activity when produced in oxidizing conditions.** Deconvoluted intact protein MS spectra representative of of n=2 IVG reaction products containing 10  $\mu\text{M}$  Im7-6, 0.4  $\mu\text{M}$  ApNGT, 2  $\mu\text{M}$  NmLgtB, 2.5 mM of UDP-Glc, UDP-Gal, and CMP-Sia as well as CjCST-I or HsSIAT1 made in CFPS conducted under oxidizing conditions, reducing conditions with supplemented the *E. coli* disulfide bond isomerase (DsbC), or standard reducing conditions (see **Methods**). CFPS conditions are known to create a protein synthesis environment conducive to disulfide bond formation as previously described<sup>24</sup>. Lysates enriched with sialyltransferases by CFPS were added in equal volumes. Therefore, reducing reaction conditions contained 1.9  $\mu\text{M}$  of CjCST-I or 3.8  $\mu\text{M}$  of HsSIAT1 while oxidizing reaction conditions reactions contained 1.3  $\mu\text{M}$  of CjCST-I and 0.7  $\mu\text{M}$  of HsSIAT1 (detailed CFPS yield information shown in **Supplementary Fig. 4**). Aside from CFPS synthesis conditions for the CjCST-I and HsSIAT1, IVG reactions were performed identically without ensuring an oxidizing environment for glycosylation. Im7-6, ApNGT, and NmLgtB were produced with standard CFPS reaction conditions. Relative glycosylation efficiencies indicate that the oxidizing CFPS environment of CFPS allows for greater enzyme activities per unit of CFPS reaction volume and per  $\mu\text{M}$  of enzyme. This observation makes sense for HsSIAT1 which is normally active in the oxidizing environment of the human golgi and is known to contain disulfide bonds. Interestingly, an oxidizing synthesis environment also seems to benefit the activity of CjCST-I which does not contain disulfide bonds. However, the increased activity of CjCST-I cannot be explained by the general chaperone activity of DsbC.

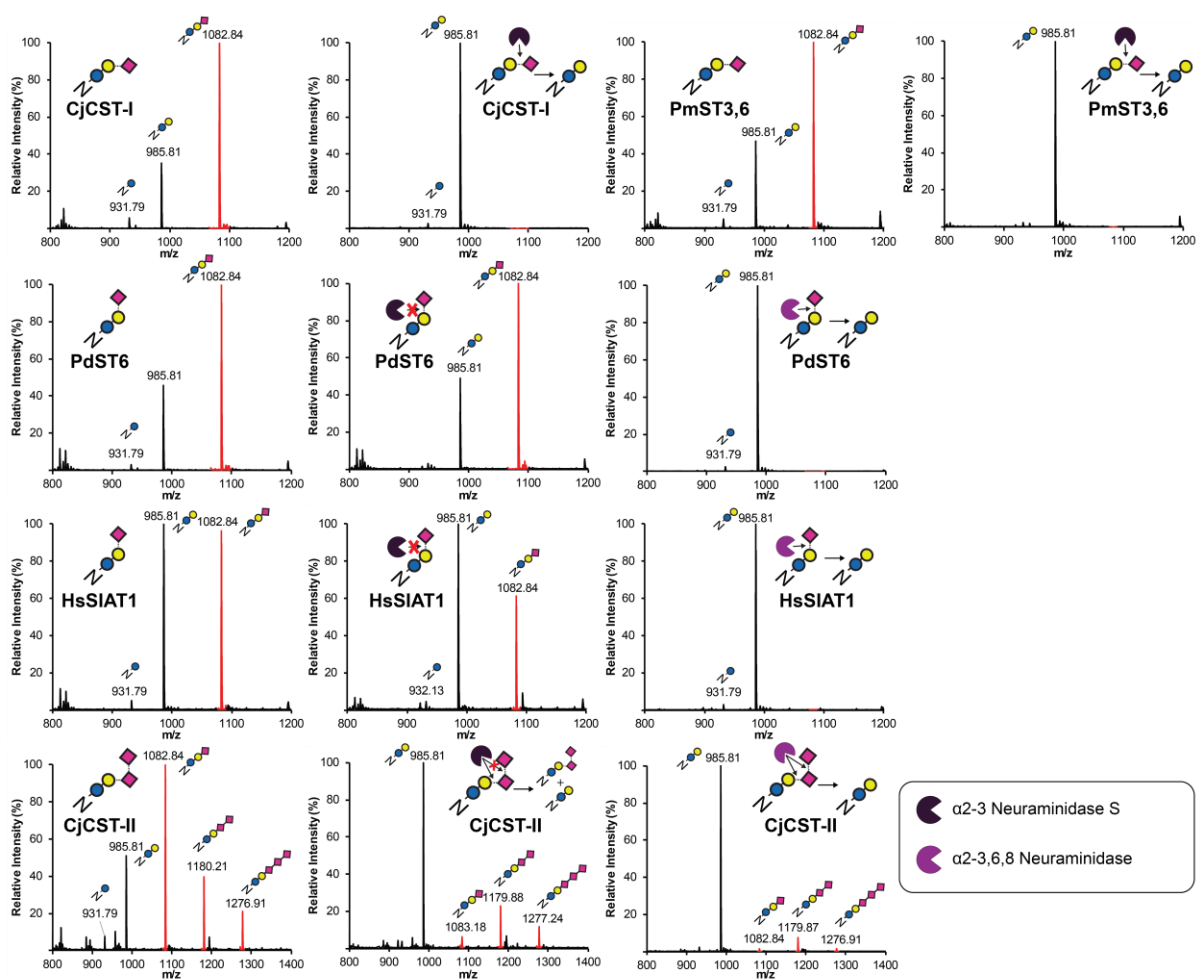

**Supplementary Figure 10: Exoglycosidase sequencing of Im7-6 modified by GlycoPRIME biosynthetic pathways containing sialic acids.** Completed IVG reactions from the GlycoPRIME workflow where purified using Ni-NTA magnetic beads, incubated at 37°C for at least 4 h with and without indicated commercially available exoglycosidases, trypsinized overnight, and then analyzed by glycopeptide LC-MS. The  $\alpha$ 2-3 Neuraminidase S was able to remove the sialic acids installed by CjCST-I; PmST3,6; and the first sialic acid installed by CjCST-II, indicating that these enzymes were installed sialic acids with  $\alpha$ 2-3 linkages. Sialic acids installed by PdST6, HsSIAT1, as well as the second and third sialic acids installed by CjCST-II were resistant to digestion by  $\alpha$ 2-3 Neuraminidase S but were susceptible to cleavage by an  $\alpha$ 2-3,6,8 Neuraminidase which is consistent with the established  $\alpha$ 2-6 activity of PdST6 and HsSIAT1 and the  $\alpha$ 2,8 linkages installed by CjCST-II in subsequent sialic acid additions. See **Methods** section for exoglycosidase details. All spectra were acquired from full elution peak areas of all detected glycosylated and aglycosylated species of the Im7-6 tryptic peptide EATTGGNWTTAGGDVLDVLEHFVK containing an ApNGT glycosylation acceptor sequence. All indicated glycopeptide products are triply charged ions consistent with this Im7-6 tryptic peptide modified with indicated sugar structures.

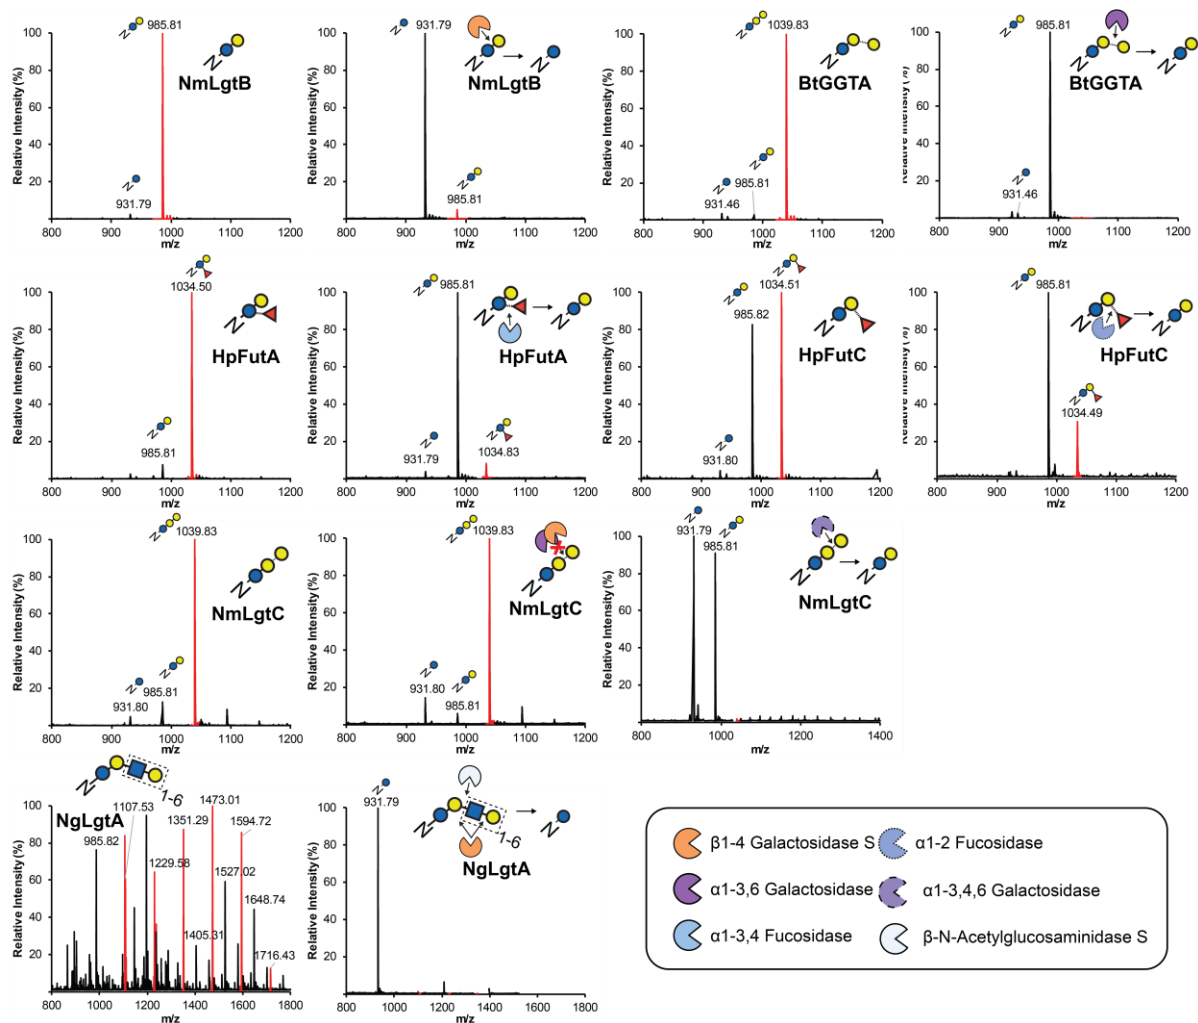

**Supplementary Figure 11: Exoglycosidase sequencing of Im7-6 modified by GlycoPRIME biosynthetic pathways not containing sialic acids.** Completed IVG reactions from the GlycoPRIME workflow where purified using Ni-NTA magnetic beads, incubated at 37°C for at least 4 h with and without indicated commercially available exoglycosidases, trypsinized overnight, and then analyzed by glycopeptide LC-MS. The sugars installed by NmLgtB, BtGGTA, HpFutA, and HpFutC were susceptible to cleavage by commercially available  $\beta$ 1-4 Galactosidase S;  $\alpha$ 1-3,6 Galactosidase;  $\alpha$ 1-3,4 Fucosidase; and  $\alpha$ 1-2 Fucosidase, respectively. The galactose installed by NmLgtC was resistant to cleavage by  $\beta$ 1-4 Galactosidase S and  $\alpha$ 1-3,6 Galactosidase, but susceptible to cleavage by  $\alpha$ 1-3,4,6 Galactosidase. The LacNAc polymer installed by alternating activities by NmLgtB and NgLgtA was susceptible to cleavage by a mixture of  $\beta$ 1-4 Galactosidase S and the  $\beta$ -N-Acetylglucosaminidase S. All spectra were acquired from full elution peak areas of all detected glycosylated and aglycosylated species of the Im7-6 tryptic peptide EATTGGNWTAGGDVLDVLLLEHFVK containing an ApNGT glycosylation acceptor sequence. All indicated glycopeptide products are triply charged ions consistent with this Im7-6 tryptic peptide modified with indicated sugar structures. Cleavage observations are consistent with previously established GT activities (Figs. 2-3 and Supplementary Table 4). See Methods section for exoglycosidase details.

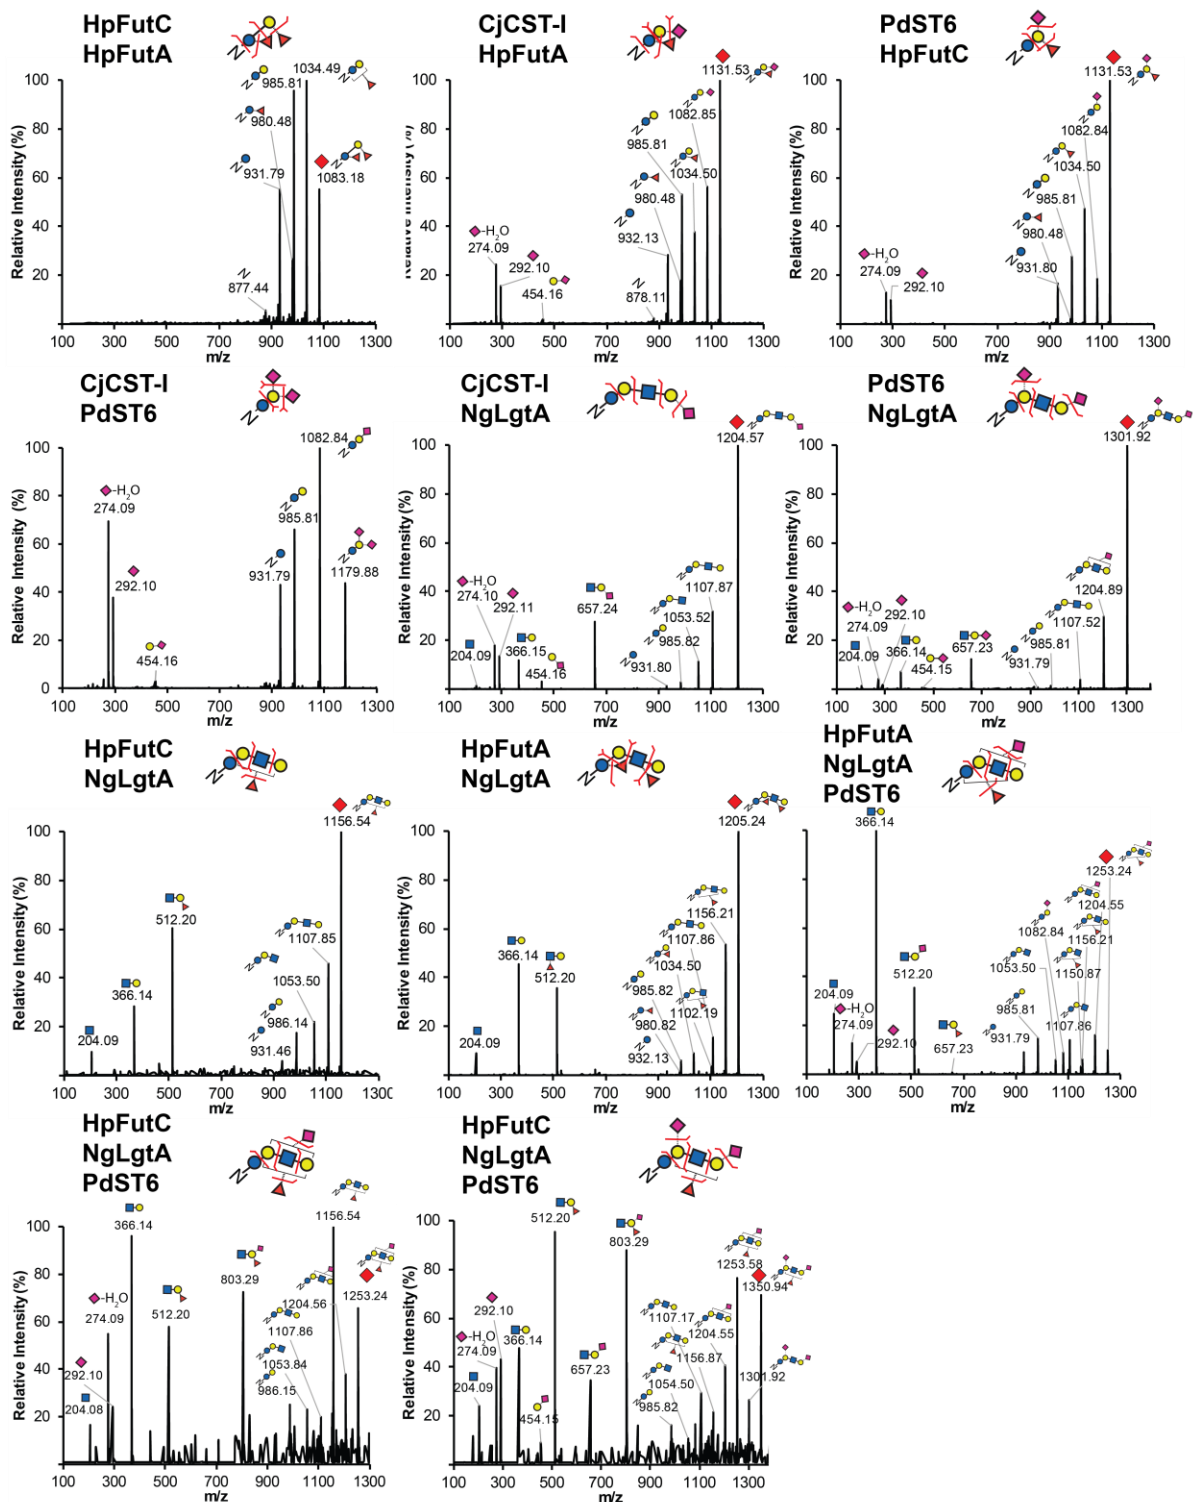

**Supplementary Figure 12: Glycopeptide MS/MS spectra of GlycoPRIME reaction products from four and five enzyme biosynthetic pathways elaborating N-linked lactose.**

Products from IVG reactions containing four and five enzyme pathways modifying Im7-6 shown in Fig. 3d and Supplementary Fig. 14 were purified, trypsinized, and analyzed by pseudo MRM MS/MS fragmentation at theoretical glycopeptide masses (indicated by red

diamonds) corresponding to detected protein MS peaks in **Fig. 3d and Supplementary Fig. 14**. All glycopeptides were fragmented using a collisional energy of 30 eV with a window of  $\pm 2$  m/z from targeted m/z values (see **Methods**). Spectra representative of many MS/MS acquisitions from n=1 IVG reaction. Theoretical protein, peptide, and sugar ion masses derived from expected glycosylation structures are shown in **Supplementary Tables 3 and 5**. All indicated sugar ions are singly charged and glycopeptide fragmentation products are triply charged ions consistent with modification of Im7-6 tryptic peptide EATTGGNWTTAGGDVLDVLEHFVK with indicated sugar structures. Predicted sugar linkages based on previously established GT activities (**Supplementary Table 4**). Although products from five-enzyme biosynthetic pathway product could not be unambiguously defined, sugar and glycopeptide fragments do suggest modification with both fucose and sialic acids. All IVG reactions contained Im7-6, ApNGT, NmLgtB, indicated enzymes, and appropriate sugar donors according to established GT activities.

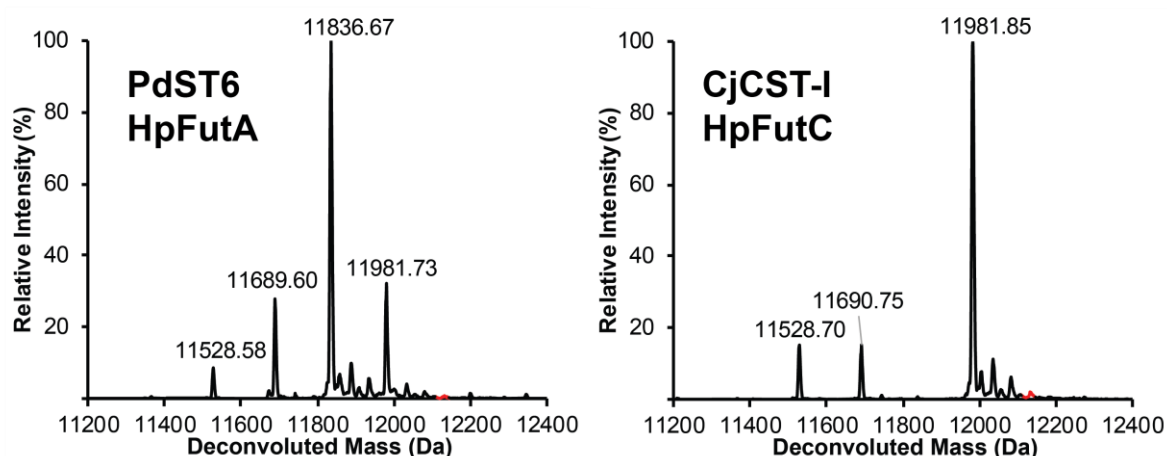

**Supplementary Figure 13: Deconvoluted intact protein MS spectra of IVG reaction products showing no production fucosylated and sialylated species.** Products of IVG reactions containing 10  $\mu\text{M}$  Im7-6, 0.4  $\mu\text{M}$  ApNGT, 2  $\mu\text{M}$  NmLgtB, indicated enzymes, and 2.5 mM of appropriate sugar donors (UDP-Glc, UDP-Gal, CMP-Sia, and GDP-Fuc) were purified and analyzed by intact protein MS. Reactions contained 2.4  $\mu\text{M}$  HpFutA and 2.4  $\mu\text{M}$  PdST6 or 1.3  $\mu\text{M}$  HpFutC and 0.65  $\mu\text{M}$  CjCST-I as indicated. Deconvoluted spectra representative of  $n=2$  IVGs. No peaks were detected that indicated the presence of Im7-6 modified with both a sialic acid and a fucose (the region of the spectra annotated in red line shows expected range of sialylated and fucosylated species) (see **Supplementary Table 4** for theoretical mass values).

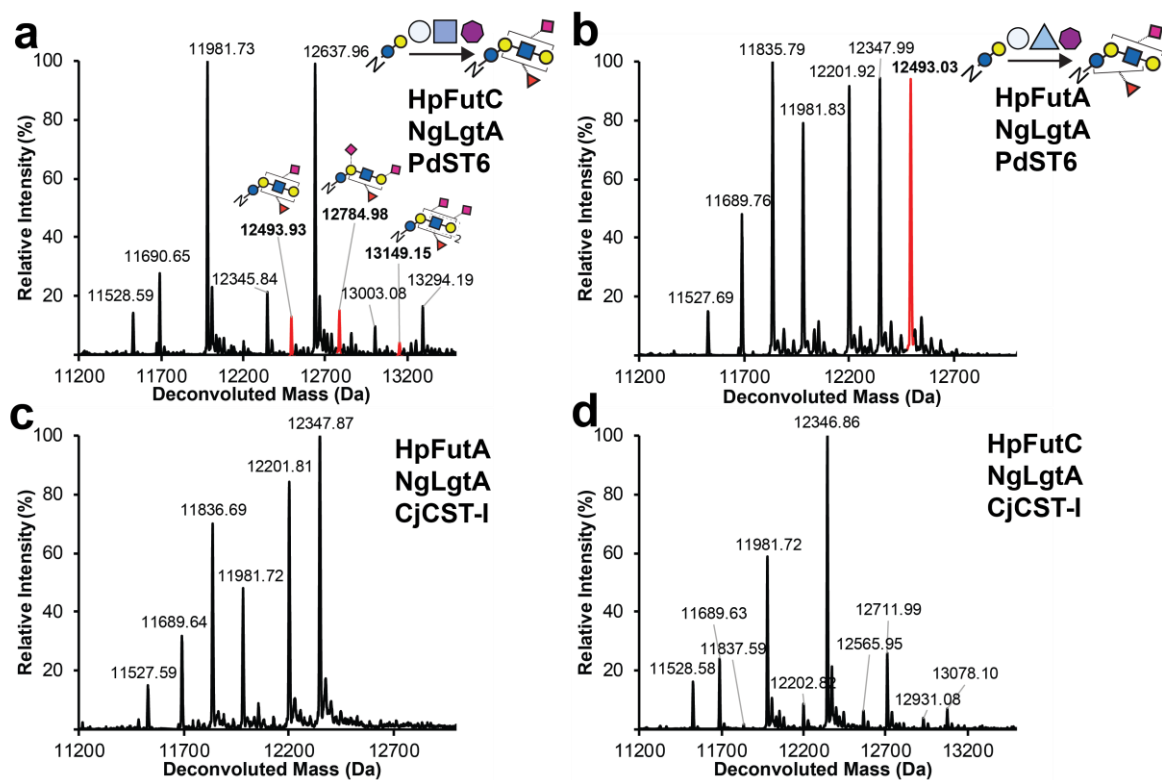

**Supplementary Figure 14: GlycoPRIME screening of biosynthetic pathways containing five enzymes.** Products of IVG reactions containing 10  $\mu\text{M}$  Im7-6, 0.4  $\mu\text{M}$  ApNGT, 2  $\mu\text{M}$  NmLgtB, indicated GTs, and 2.5 mM of appropriate sugar donors (UDP-Glc, UDP-Gal, CMP-Sia, and GDP-Fuc) were purified from and analyzed by intact protein MS. Deconvoluted spectra representative of  $n=2$  IVGs. **(a)** Deconvoluted intact protein MS of IVG reactions containing 0.87  $\mu\text{M}$  HpFutC, 3.83  $\mu\text{M}$  NgLgtA, and 1.63  $\mu\text{M}$  PdST6. **(b)** Deconvoluted intact protein MS of IVG reactions containing 1.63  $\mu\text{M}$  HpFutA, 3.83  $\mu\text{M}$  NgLgtA, and 1.63  $\mu\text{M}$  PdST6 (also shown in **Fig. 3d**) **(c)** Deconvoluted intact protein MS of IVG reactions containing 1.63  $\mu\text{M}$  HpFutA, 3.83  $\mu\text{M}$  NgLgtA, and 0.43  $\mu\text{M}$  CjCST-I. **(d)** Deconvoluted intact protein MS of IVG reactions containing 0.87  $\mu\text{M}$  HpFutC, 3.83  $\mu\text{M}$  NgLgtA, and 0.43  $\mu\text{M}$  CjCST-I. Spectra in **a** and **b** as well as fragmentation spectra in **Supplementary Fig. 12** indicated three and one species, respectively, which contained both sialic acid and fucose. Predicted glycosylation structures based on previously established GT activities (**Supplementary Table 4**) and fragmentation spectra (**Supplementary Fig. 12**). Although structures cannot be unambiguously identified, the previously observed incompatibility of HpFutA and PdST6 as well as the presence of a 1083  $m/z$  peak (Sia $\alpha$ 6Gal $\beta$ 4Glc-Peptide) and the absence of a 1034  $m/z$  (Gal $\beta$ 4(Fuc $\alpha$ 3)Glc-Peptide) peak in fragmentation spectra in **Supplementary Fig. 12** suggests that in **b** the proximal galactose is modified with a sialic acid while the GlcNAc is modified with the fucose. No peaks in **c** or **d** were detected that indicated the presence of Im7-6 modified with both a sialic acid and a fucose (see **Supplementary Table 3** for theoretical mass values).



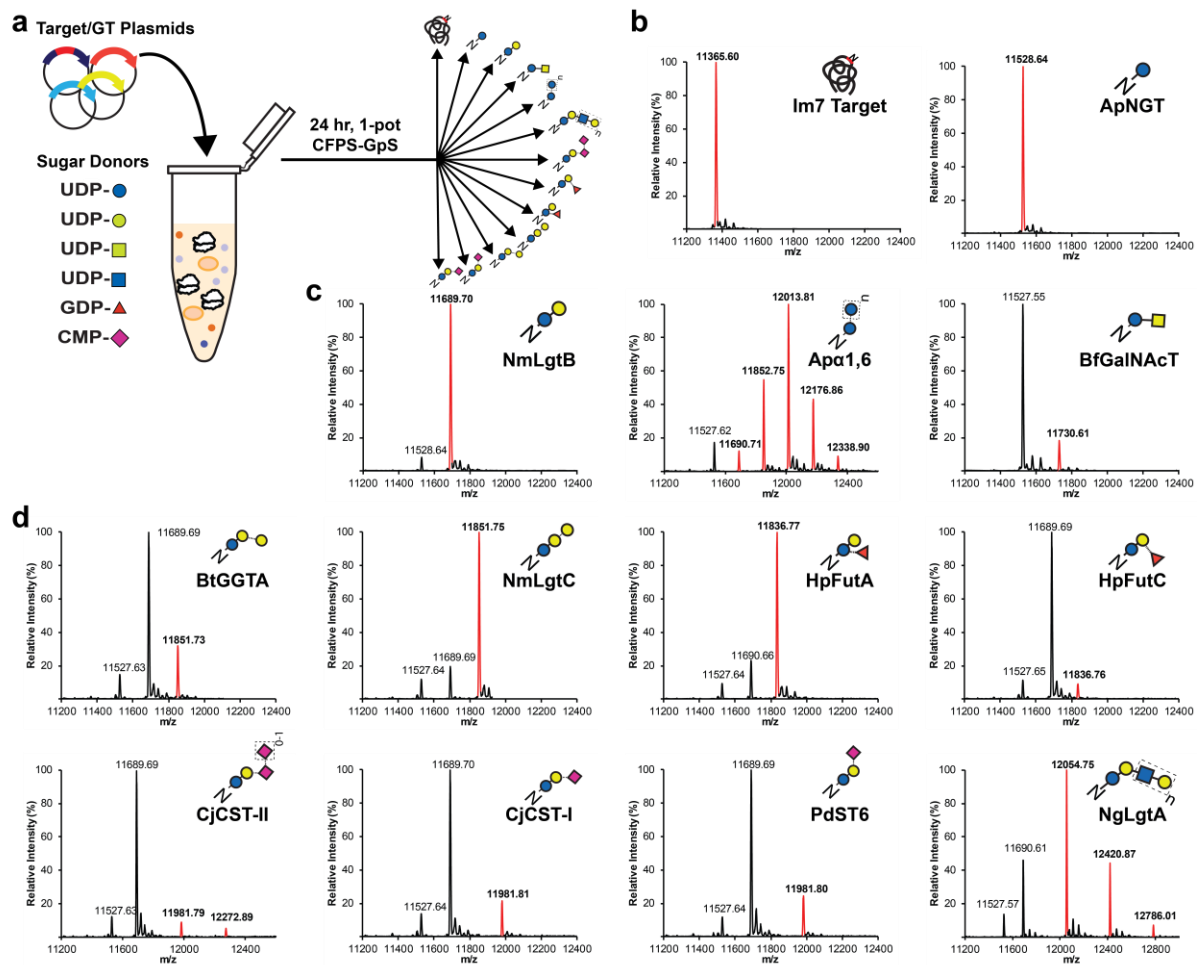

**Supplementary Figure 15: Intact protein MS spectra of Im7-6 synthesized and glycosylated by CFPS-GpS reactions.** (a) Plasmids encoding the Im7-6 target protein and sets of up to three GTs based on 12 successful biosynthetic pathways developed by two-pot GlycoPRIME screening were combined with appropriate sugar donors in one-pot CFPS-GpS reactions and incubated for 24 h at 30°C. (b) Deconvoluted intact protein spectra from Im7-6 synthesized and glycosylated in CFPS-GpS reactions with and without ApNGT plasmid. (c) Deconvoluted intact protein spectra from Im7-6 synthesized and glycosylated in CFPS-GpS reactions with ApNGT plasmid and indicated GT plasmids. (d) Deconvoluted intact protein spectra from Im7-6 synthesized and glycosylated in CFPS-GpS reactions with ApNGT, NmLgtB, and indicated GT plasmids. All reactions contained equimolar amounts of each plasmid and a total plasmid concentration of 10 nM. All Im7-6 proteins were purified using Ni-NTA magnetic beads before intact protein analysis (see **Methods**). All reactions showed intact protein mass shifts consistent with the modification of Im7-6 with the same glycans observed in our two-pot system (**Figs. 2-3**), although at lower efficiency. MS spectra were acquired from full elution areas of all detected glycosylated and aglycosylated protein or peptide species and are representative of n=2 CFPS-GpS reactions. Deconvoluted spectra collected from m/z 100-2000 into 11,000-14,000 Da using Bruker Compass Data Analysis maximum entropy method. See **Supplementary Fig. 5** for theoretical mass values.

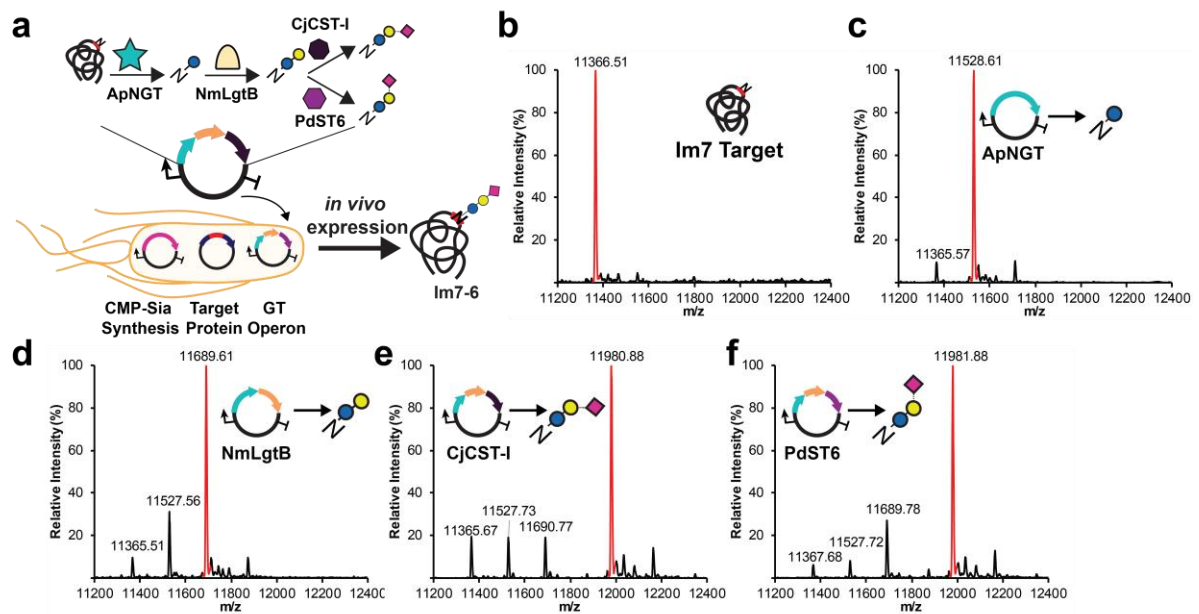

**Supplementary Figure 16: Production of sialylated Im7-6 in the *E. coli* cytoplasm.** (a) Design of cytoplasmic glycosylation system to produce sialylated glycoproteins in *E. coli*. Three plasmids containing NmNeuA (CMP-Sia synthesis), target protein containing ApNGT glycosylation acceptor sequence, and biosynthetic pathways discovered using GlycoPRIME (GT operon). (b-f) Deconvoluted intact protein spectra from Im7-6 purified from CLM24 $\Delta$ nanA *E. coli* strain containing CMP-Sia synthesis plasmid and Im7-6 target protein plasmid as well as no GT operon **b**; GT operon containing ApNGT **c**; GT operon containing ApNGT and LgtB **d**; GT operon containing ApNGT, NmLgtB, and CjCST-I **e**; or GT operon containing ApNGT, NmLgtB, and PdST6 **f**. The last GT in all glycosylation pathways is indicated. Mass shifts in intact protein spectra are consistent with established activities of each GT and the installation of *N*-linked Glc, lactose, 3'-sialyllactose, and 6'-sialyllactose onto Im7-6 in **b**, **c**, **d**, **e**, and **f**, respectively. All *E. coli* cultures were supplemented with 5 mM sialic acid and grown to OD600 = 0.6 at 37°C, induced with 1 mM IPTG and 0.2% arabinose, and then incubated overnight at 25°C. MS spectra were acquired from full elution areas of all detected glycosylated and aglycosylated protein species and were deconvoluted from m/z 100-2000 into 11,000-14,000 Da using Bruker Compass Data Analysis maximum entropy method. See **Supplementary Table 3** for theoretical masses. Spectra representative of n=2 bacterial cultures.

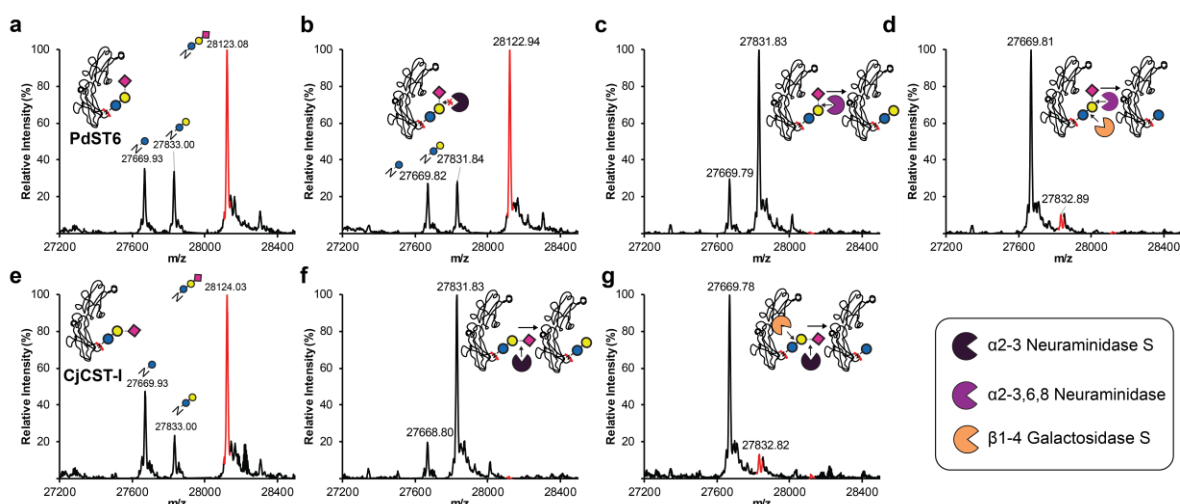

**Supplementary Figure 17: Exoglycosidase sequencing of Fc glycosylated in the *E. coli* cytoplasm.** (a) Deconvoluted intact protein spectra from Fc-6 purified from CLM24 $\Delta$ nanA *E. coli* strain containing CMP-Sia synthesis plasmid, Fc-6 target protein plasmid, and a GT operon plasmid containing ApNGT, NmLgtB, and PdST6. (b-d) Purified Fc-6 from a was incubated at 37°C for at least 4 h with commercially available  $\alpha$ 2-3 Neuraminidase S b,  $\alpha$ 2-3,6,8 Neuraminidase c, or  $\beta$ 1-4 Galactosidase S and  $\alpha$ 2-3,6,8 Neuraminidase d. Resistance of terminal sialic acid to  $\alpha$ 2-3 Neuraminidase S and susceptibility to  $\alpha$ 2-3,6,8 Neuraminidase indicates an  $\alpha$ 2-6 linkage, which is consistent with previously established activity of PdST6 (**Supplementary Table 4**). (e) Deconvoluted intact protein spectra from Fc-6 purified from CLM24 $\Delta$ nanA *E. coli* strain containing CMP-Sia synthesis plasmid, Fc-6 target protein plasmid, and a GT operon plasmid containing ApNGT, NmLgtB, and CjCST-I. (f-g) Purified Fc-6 from e was incubated at 37°C for at least 4 h with commercially available  $\alpha$ 2-3 Neuraminidase S b, or  $\beta$ 1-4 Galactosidase S and  $\alpha$ 2-3 Neuraminidase S. Susceptibility of terminal sialic acid to  $\alpha$ 2-3 Neuraminidase confirms the previously established activity of CjCST-I (**Supplementary Table 4**). Removal of middle galactose with addition  $\beta$ 1-4 Galactosidase S in d and g confirms the previously established activity of NmLgtB (**Supplementary Table 4**). a-c and e-f are also shown in Fig. 4. See **Methods** for exoglycosidase details and **Supplementary Table 7** for theoretical glycoprotein masses. All *E. coli* cultures were supplemented with 5 mM sialic acid and grown to OD600 = 0.6 at 37°C then induced with 1 mM IPTG and 0.2% arabinose then incubated overnight at 25°C. MS spectra were acquired from full elution areas of all detected glycosylated and aglycosylated protein species and were deconvoluted from m/z 100-2000 into 27,000-29,000 Da using Bruker Compass Data Analysis maximum entropy method.

**Supplementary Note 1: DNA sequences encoding engineered glycosylation targets, *in vitro* expressed glycosyltransferases, *in vivo* glycosyltransferases operons, and *in vivo* CMP-Sia production plasmid.**

**Key:**

TRANSLATED REGION

**Engineered glycosylation acceptor sequence**

Flanking regions adjacent to glycosylation acceptor sequence

untranslated region

promoter

terminator

AFFINITY TAG OR CSL LEADING SEQUENCE

**DNA sequence for Im7-6 Variant in pJL1 plasmid context:**

gaaat**taatac**gactcactatagg****gagaccacaacggttccctctagaaataat**ttgtttaactttaagaaggagatatacat**  
ATGGA**ACTGGAAA**ATAGTATTAGTGATTACACAGAGGCTGAGTTT**GTTCAACTTCTTAAGG**  
AAATTGAAA**AAGAGGCGACTACCGGAGGTA**ACTGGACAACAGCGGGAGGAGATGTGTT****  
AGATGTGTTACTCGAACACTTTGTAAA**ATTACTGAGCATCCAGATGGAACGGATCTGAT**  
CTATTATCCTAGTGATAATAGAGACGATAGCC**CCGAAGGGATTGTCAAGGAAATTAAGAA**  
TGCGGAGCTGCTAACGGTAAGCCAGGATTTAAACAGGGCGGATCC**CATCACCATCATCA**  
**CCATTAA**gtcgaccggctgctaacaagcccgaaggaagctgagttggctgctgccaccgctgagcaataactag**ata**  
**acccttggggcctctaaacgggtcttgaggggtttttg**ctgaaag

**DNA Sequence of ApNGT in pJL1 Context:**

gaaat**taatac**gactcactatagg****gagaccacaacggttccctctagaaataat**ttgtttaactttaagaaggagatatacat**AT  
GGAAAACGAGAATAAACCGAACGTGGCAAATTTTGAAGCAGCAGTTGCAGCCAAAGATT  
ATGAAA**AAGCATGTAGCGAGCTGCTGCTGATTCTGAGCCAGCTGGATAGCAATTTTGGT**  
GGCATT**CATGAAATCGAGTTCGAGTACCCAGCTCAGCTGCAGGATCTGGAGCAGGAAAA**  
AATTGTG**TACTTTTGCACCCGATGGCGACTGCCATCACCACCCTGTTCTCTGACCCGG**  
TTCTG**GAAATCTCCGACCTGGGTGTGCAGCGTTTCTGGTTTATCAGCGTTGGCTGGCG**  
CTGATCTTCGCTAGCAGCCCGTTCGTGAACGCAGACCACATCCTGCAGACTTACAACCG  
TGAACCGAACCGCAAAA**ACTCCCTGGAAATTCACCTGGACTCTAGCAAGTCTCTCTGA**  
TTAAATTTTGCATCCTGTACCTGCCGGAATCTAATGTGAACCTGAATCTGGATGTGATGTG  
GAACATTTCCCGGAGCTGTGTGCCTCTCTGTGCTTTGCGCTGCAAAGCCCGCGTTTT  
GTTGGCACCAGCACCGCCTTTAA**CAAACGCGCGACCATTCTGCAGTGGTTCCCGCGTC**  
ATCTGGACCAGCTGAAAACCTGAACAACATCCCGTCCGCTATCTCTCATGACGTGTATA  
TGCAGTGTCTTACGACACCAGCGTTAA**CAAGCACGATGTTAAGCGCGCGCTGAATCAC**  
GTGATTCGTCGCCACATCGAATCCGAATACGGTTGGAAGATCGTGATGTGGCTCACAT  
CGGTTATCGCAACAACAAACCGGTTATGGTCGTTCTGCTGGAACATTTT**CATAGCGCGCA**  
CTCTATCTACCGTACTCACTCTACCAGCATGATCGCCGCGCGCAACACTTCTATCTGAT  
CGGCCTGGGTTCCCGAGCGTTGACCAGGCCGGTCAGGAGGTTTTTCGATGAATTCCAC  
CTGGTAGCGGGTGACAACATGAAGCAAAA**ACTGGAATTCATTCTGTTCTGTGTGCGAAAG**  
CAATGGTGCGGCAATTTTCTACATGCCGAGCATCGGTATGGATATGACCACCATCTTCGC

GTCCAATACCCGTCTGGCGCCGATTGAGGCAATCGCCCTGGGCCACCCGGCGACTACT  
CACTCCGACTTCATTGAATACGTTATCGTGGAAGACGACTACGTCGGCTCTGAGGAATG  
CTTCTCTGAAACCCTGCTGCGTCTGCCGAAAGACGCTCTGCCGTATGTTCCGTCCGCC  
CTGGCTCCGGAGAAAGTTGATTACCTGCTGCGTGAAAACCCTGAAGTTGTCAACATCGG  
TATTGCCTCTACCACTATGAAGCTGAACCCGACTTCCTGGAAGCACTGAAGGCCATTTCG  
TGACCGTGCGAAGGTGAAAGTGCACCTTCCACTTCGCACTGGGCCAGTCCAATGGTATC  
ACTCACCCCTTACGTTGAACGCTTTATCAAATCTTACCTGGGCGACAGCGCTACCGCGCA  
CCCGCACTCTCCGTACCACCACTGACCTGCGTATTCTGCACAACTGCGATATGATGGTAAA  
CCCTTTTCCGTTTGGTAATACCAATGGTATTATTGACATGGTAACCCTGGGTCTGGTAGGT  
GTTTGCAAACCGGTGCGGAAGTCCACGAACATATCGATGAAGGCCTGTTCAAACGTCT  
GGGCCTGCCGGAATGGCTGATTGCAAACACCGTGGACGAATACGTGGAACGTGCAGTG  
CGCCTGGCCGAGAACCATCAGGAACGTCTGGAACCTGCGTTCGTTACATTATTGAAAACAA  
TGCCCTGAACACCCTGTTACCCGGCGACCCACGCCCGATGGGTGAGGTGTTCTGAA  
AACTGAACGCATTCTGAAGGAAAATAAgtcgaccggctgctaacaagcccgaaggaagctgagtt  
ggctgctgccaccgctgagcaataactagc**ataacccttggggcctctaaacgggtcttgaggggtttttg**ctgaaa

**DNA Sequence of Apr1-6 in pJL1 Context:**

gaaat**taatacgcactatagg**gagaccacaacggtttccctctagaaacgacactataactacttaaggaggctaatATGG  
AAAACAACATCGACCTGAACGTTTATTTCTGCTTCGTCAACCGTCCATGCACTGGCGGC  
GATTCGTTAACCTGGATCACGTCCGTACCCTGCGCAAACCTGGGCATCAACGCTAGCAT  
TCTGCTGGCTGGCAACCAGTCCGAAGAAATCGTTAACAGCTTCGGCTCTCTGCCAGTTG  
TGATTCTGAACGAAGAGATTGAGTTTAGCTCCCAGGATATCTTCATTGTGCCGGAAGTTA  
TGCAGGTTCTGTACGATCTGGCTTCCAAGATGACCGTCTTCCCAGGATGATTATGCACA  
ACCAAACCCATTTTACACTGGCTATGTTTTCTGTCCGCGCAGCACATTAACGAACACC  
GTCTGGAACGCATTATCGTCCCGTCCAGCTACACCAAATACAACTGCAGGAAATCGGC  
GTAACCAAACCGATCGATATCATTATCCGTATATTCCAGATTATTTCAAGCCGGCGGAAA  
AACAGCGTGAGGTCATTCAAATCGCCTTCTCCCGTCGTAAACGTTCTGCGGAATTCGAC  
ATCTTCAAGTTCTACTTCTGTCCCTGTAACCTCCACAAACACTCTGTAAACTTTGTTAACA  
TCCAGGGTCTGACCCGCGAGGAAGTGGCGAAGGTTATGTCTGAAGCGGCCATCTTTATT  
TCCTTTGCTGAACGTGAATCTCTGGGTCTGATGACGCTGGAAGCTATGGCATCCGGTTG  
TCACGTTATCGGCTTCTCCGTTATACTGACATCTACAATAACGAAGTTATTGACGATTCT  
GTTGGTGAAGTGGATCGGTGAAGGCGAGTACACCCTGTTTCGCACAGAAAGTTTGTGAGG  
CGATCGATGACTTCGTGAACGGCAAATGAATCCGAAAATTGAAAACGGTCTGCGTCTG  
ATCGAACAGCGTTTCCGTATTCGTCACCTTCGAACAGGAAGTAAAACGTGTATACGGTAAC  
ATTTTCGATTATGATCTGGAAAACCTCTCGCTCCTAAgtcgaccggctgctaacaagcccgaaggaag  
ctgagttggctgctgccaccgctgagcaataactagc**ataacccttggggcctctaaacgggtcttgaggggtttttg**ctgaaa

**DNA Sequence of BfGalNAcT1 in pJL1 Context:**

gaaat**taatacgcactatagg**gagaccacaacggtttccctctagaaaggagactagacttattaatthaaggaggctata  
ATGGGTACCAACAACCTCTGACTTCTACCTGCCGGTCTATGTTATTAATCTGAAAGAACGTA  
CTGAACGCCGTCAGCACATTGAGGAGCAGTTCCAAGGTAAAGTTGAATTCGCTCTGCAC  
TGGATCGAGGCGATCGAGCACAGCATCGGTGCGGTGGGTCTGTGGCAGTCTATGCTGA  
AAGCCGTTGACTGCTATCGACAAACGCGACGATATCATGATCATTTGTGAGGATGACC

ACATTTTCACTCCGGCATAACAAGGACTACCTGTTCCGGAATATCATCGGTGCGAACG  
CACAGGGTAGCGAACTGCTGTCCGGTGGTGTGGCGGTTTCGGTACCGCGGTGCCAG  
TGGATACCAACCGTTATTGGATGGACTGGTTCTGGTCTACCCAATTCATCATCATCTTCAA  
GCCGCTGTTCCAGAAAATCCTGGACTATGATTTCAAAGACACCGACACGGCTGACGGC  
GTCCTGAGCGTTCTGGCGAAAGACAAGATGACCATCTATCCGTTCATTAGCGTTCAAAA  
GATTTCCGGTTACAGCGACGTGACCGTTTACAACGGTACTCCTGGTATGATCTCTAACTAC  
TTTTCCAGGCTAACTACCGCCTGCGTATGATCCACCATGTAAGCCACAAATTCAAAGAG  
CAGGCAAAACGCTAAgtcgaccggctgctaacaagcccgaaggaagctgagttggctgctgccaccgctgagca  
ataactagc**ataacccttggggcctctaaacgggtcttgaggggtttttgct**gaaag

#### DNA Sequence of Hp $\beta$ 4GalI in pJL1 Context:

gaaat**taatac**gact**cactatagg**gagaccacaacggttccctctagaataatttgttaactttaagaaggagatatacat**AT**  
**GGAGAAAAAATCTGGAGCCATCCGCAGTTCGAAAAAGGCTCC**CGCGTGTATTATCA  
GCCTGAATCAGAAAGTTTGCATCAGTTTGGTCTGGTTTTTCGTGATACCACCACCCTG  
CTGCATAACATTAATGCAACCCATCATAAGCCAGATCTTCGATGCAATTTACAGCAAAA  
CCTTTGAAAGCGAACTGCATCCGCTGGTTAAAAACATCTGCATCCGTATTTTATCACCC  
AGAACATTAAGATATGGGCATTACCACCAATCTGATTAGCCGTGTTAGCAAATTCTATTAT  
GCCCTGAAATACCATGCCAAATTTATGAGCTTTGGTGAACCTGGGTTGTTATGCAAGCCAT  
TATAGCCTGTGGGAAAAATGCATTGAACCTGAATGAACCGATTTGCATCCTGGAAGATGAT  
ATCACCTGAAAGAAGATTTTAAAGAGGGCCTGGATTTCTGGAAAAACATATTCAAGAA  
CTGGGCTATGCACGTCTGATGTATCTGCTGTATGATGCCAATGTTAAAAGCGAACCGCTG  
AGCCATAAAAACCATGAAATCCAAGAACGTGTGGGCATCATTAAAGCATATAGCCATGGT  
GTTGGCACCCAGGGTTATGTTATTACCCCGAAAATTGCCAAAGTGTTCAAAAAATGTAGC  
CGCAAATGGGTTGTTCCGGTTGATACCATTATGGATGCAACCTTTATTCACGGCGTTAAA  
AATCTGGTTCTGCAGCCGTTTGTATTGCAGATGATGAGCAGATTAGCACCATTTGCACGT  
AAAGAAGAACCGTATAGCAGCAAAATTGCACTGATGCGTAAACTGCACTTCAAATATCTG  
AAATACTGGCAGTTCGTGTAAgtcgaccggctgctaacaagcccgaaggaagctgagttggctgctgccacc  
gctgagcaataactagc**ataacccttggggcctctaaacgggtcttgaggggtttttgct**gaaag

#### DNA Sequence of NmLgtB in pJL1 Context:

gaaat**taatac**gact**cactatagg**gagaccacaacggttccctctagaataatttgttaactttaagaaggagatatacat**AT**  
GCAGAACCATGTTATTAGCCTGGCAAGCGCAGCAGAACGTCGTGCACATATTGCAGATA  
CCTTTGGTCGTGTCATGGTATTCCGTTTCAGTTTTTTGATGCACTGATGCCGAGCGAACGTC  
TGGAACAGGCAATGGCAGAACTGGTTCGGGTCTGAGCGCACATCCGTATCTGAGCGG  
TGTTGAAAAAGCATGTTTTATGAGCCATGCAGTTCTGTGGAAACAGGCACTGGATGAAG  
GTCTGCCGTATATTACCGTTTTTGAAGATGATGTTCTGCTGGGTGAAGGTGCAGAAAAAT  
TTCTGGCAGAAGATGCCTGGCTGCAAGAACGTTTTGATCCGGATACCGCATTATTGTTCT  
GTCTGGAAACCATGTTTATGCATGTTCTGACCAGCCCGAGCGGTGTGGCAGATTATTGT  
GGTCGTGCATTTCCGCTGCTGGAAAGCGAACATTGGGGCACCGCAGGTTATATCATTAG  
CCGTAAAGCAATGCGCTTTTTTCTGGATCGTTTTGCAGCACTGCCTCCGGAAGGCCTGC  
ATCCGGTTGATCTGATGATGTTTAGCGATTTTTTTGATCGTGAAGGTATGCCGGTTTGTCA  
GCTGAATCCGGCACTGTGTGCACAAGAAGTGCATGCAAAATTTTCATGATCAGAATAG  
CGCACTGGGTAGCCTGATTGAACATGATCGTCTGCTGAATCGTAAACAGCAGCGTCGTG

ATAGTCCGGCAAATACCTTTAAACATCGTCTGATTCTGCGCCCTGACCAAATTAGCCGTG  
AACGTGAAAAACGTCGTCAGCGTCGCGAACAGTTTATTGTGCCGTTTCAGGGATCCTGG  
AGCCATCCGCAGTTCGAAAAATAAgtcgaccggctgctaacaagcccgaaggaagctgagttggctgctgc  
caccgctgagcaataactagc**ataacccttggggcctctaaacgggtcttgaggggtttttg**ctgaaag

**DNA Sequence of Btβ4GalT1 in pJL1 Context:**

gaaat**taatac**gact**cactat**aggagaccacaacggtttccctctagaacgatatcgtcacactagttaaggaggttaagaAT  
GAAATTCGGTGAGCCGCTGCTGGGCGGCTCTGCTGCAATGCCGGGCGCCTCTCTGCAA  
CGTGCATGCCGTCTGCTGGTCGCAGTTTGC GCGCTGCACCTGGGTGTTACCCTGGTCT  
ACTATCTGGCTGGCCGCGATCTGCGTCGCCTGCCGCAACTGGTTGGTGTGCACCCGCC  
TCTGCAGGGTAGCAGCCATGGTGCGGCAGCTATCGGCCAACCGAGCGGTGAACTGCG  
CCTGCGTGGTGTTCACCGCCGCCTCCGCTGCAGAACAGCAGCAAACCGCGTTCTCG  
CGCGCCGAGCAACCTGGACGCGTACTCCCACCCTGGCCCGGGCCAGGTCCGGGCA  
GCAATCTGACTTCTGCTCCTGTACCGTCTACCACCACCCGCAGCCTGACCGCATGCCC  
GGAAGAATCTCCGCTGCTGGTTGGTCCGATGCTGATCGAATCAACATCCCAGTTGACC  
TGAAGCTGGTGAACAGCAAACCCCTAAGGTGAAGCTGGGTGGTTCGTTACTCCAAT  
GGATTGCATTTCTCCGCACAAAGTCGCAATTATTATCCCTTTCCGTAACCGTCAGGAACA  
CCTGAAATACTGGCTGTACTACCTGCACCCGATCCTGCAGCGCCAGCAGCTGGATTACG  
GTATCTACGTGATTAATCAGGCGGGTGAGAGCATGTTCAATCGCGCGAAGCTGCTGAAC  
GTTGGTTTCAAGGAGGCTCTGAAAGACTACGACTACAACCTGTTTCGTATTCTCTGATGTG  
GACCTGATCCCGATGAACGACCACAACACCTACCGCTGCTTCTCCAGCCGCGCCATAT  
TTCTGTGCAATGGATAAATTCGGTTTTAGCCTGCCATACGTCCAGTACTTCGGCGGCGT  
TTCCGCTCTGAGCAAACAACAGTTCCTGTCTATCAACGGTTTTCTAACAACCTATTGGGG  
CTGGGGTGGTGAAGATGACGATATTTACAACCGCCTGGCGTTTTCGTGGTATGTCCGTTA  
GCCGTCCGAACGCGGTTATCGGTAATGCCGCATGATCCGCCATTCTCGTGATAAGAAG  
AACGAGCCGAATCCGCAGCGCTTCGACCGTATCGCCACACCAAAGAACTATGCTGTC  
CGACGGTCTGAATCCCTGACTTACATGGTACTGGAAGTACAGCGTTATCCGCTGTATAC  
CAAATCACCGTTGATATCGGCACTCCGTCTTAAgtcgaccggctgctaacaagcccgaaggaagct  
gagttggctgctgccaccgctgagcaataactagc**ataacccttggggcctctaaacgggtcttgaggggtttttg**ctgaaag

**DNA Sequence of NgLgtB in pJL1 Context:**

gaaat**taatac**gact**cactat**aggagaccacaacggtttccctctagaataatgtttaactttaagaaggagatatacat  
ATGCAGAACCACGTGATTTCCCTGGCTTCAGCGGCCGAGCGCCGTGCTCATATTGCTGC  
CACCTTTGGTAGTCGTGGAATCCCTTTCCAGTTCCTTCGATGCCCTGATGCCTTCAGAAC  
GTCTGGAGCAGGCAATGGCGGAGCTGGTCCCTGGTCTGTCAGCCCATCCTTATCTGTC  
TGCGGTTGAAAAGCGTGTTTCATGTCCCATGCTGTCCCTGTGGGAACAAGCCCTGGATG  
AGGGTCTGCCGTATATCGCCGTGTTTGAGGACGATGTGCTGCTGGGTGAAGGTGCTGA  
ACAGTTTCTGGCCGAGGACACTTGGCTGGAAGAGCGTTTCGATAAAGACTCAGCGTTCA  
TTGTCCGTCTGGAGACAATGTTTATGCACGTGCTGACTTCTCCATCTGGTGTAGCCGATT  
ATGGCGGTGCTGCCTTTCTCTGCTGGAGTCCGAACACTGTGGTACAGCCGGGTATATT  
ATCAGCCGTAAAGCCATGCGTTTCTTTCTGGATCGTTTTGCTGTGCTGCCTCCGGAGCG  
CCTGCATCCTGTTGATCTGATGATGTTTGGCAATCCTGATGACCGTGAGGGTATGCCAGT  
TTGTCAGCTGAATCCGGCACTGTGTGCTCAGGAAGTGCATTATGCCAAATTTACAGACC



AGAATAGCGCTCTGGGAAGTCTGATTGAACATGATCGTCGCCTGAACCGTAAACAACAG  
TGCGGTGATAGTCCGGCTAACACGTTTTAAACACCGCCTGATTCTGTGCTCTGACCAAAT  
GGCCGTGAGCGTGAAAAACGTCGTAAACGCCGTGAACAGACGATTGGGAAAATCATTG  
TGCCATTCCAGTGAgtcgaccggctgctaacaagcccgaaggaagctgagttggctgctgccaccgctgagcaat  
aactagc**ataaccctggggcctctaaacgggtcttgaggggtttttgctgaaag**

**DNA Sequence of SpWchJ in pJL1 Context:**

gaaat**taatacgaactcactatagg**gagaccacaacggttccctctagaataatttgtttaactttaagaaggagatatacatAT  
GAAAATCTGCCTGGTTGGTAGCAGCGGTGGTCATCTGACCCATCTGTATCTGCTGAAAC  
CGTTTTGGAAAGATAAAGAACGTTTTTGGGTGACCTTCGATAAAGAAGATAACCGTAGCA  
TTCTGGGCAACGAAACCTTTTATCCGTGTCATTATCCGACCAATCGCAATCTGAAAAACC  
TGATTA AAAACACCGTTCTGGCCTTTAACATTCTGCGCAAAGAACGTCCGGATGTGATTA  
TTAGCAGTGGTGCAGCAGTTGCAGTTCCGTTTTTCTATCTGGGTAAACTGTTTGGTGCCA  
AAACCGTGTATATCGAAGTGTGATCGTATTGATGCACCGACCCTGACCGGTAAAATTG  
TTTATCCGTTACCGATAAATTCATCGTGCAGTGGGAAGAGATGAAAAAGTTTATCCGA  
AAGCCATTAATCTGGGTGGCATCTTTTAAgtcgaccggctgctaacaagcccgaaggaagctgagttggc  
tctgccaccgctgagcaataactagc**ataaccctggggcctctaaacgggtcttgaggggtttttgctgaaag**

**DNA Sequence of SpWchK in pJL1 Context:**

gaaat**taatacgaactcactatagg**gagaccacaacggttccctctagaataatttgtttaactttaagaaggagatatacatAT  
GATCTTCGTTACCGTTGGCACCCATGAACAGCAGTTTAATCGTCTGATTAAGAAGTGGA  
TCGCCTGAAAGGTGAAGGCTTTATTCAGGATGATGTGTTTATTCAGACCGGCTATAGCAA  
TTATGTGCCGAAATTTTGCAAATGGGAGAACTGATCAGCTATGAAAAATGAACCAGCT  
GATCAAAGAGAGCGATATTATCATTACACATGGTGGTCCGGCAACCTTTATGGCAGTTATT  
GCAAAAGGTAAAAACCCGATTATTGTGCCACGCCTGAAAAATTCGGTGAACATGTTAAT  
GATCATCAGATGCAGTTCGTGAAAATCACCAAGAAATCTACAACCTGATCGTGATCGAT  
GATATTAGCGATCTGCACCTGATTCTGCACAACCTCAAAGATAAACACTTCGAAACCTACC  
TGAACAACGAACGTTTTAATGTGCGCTTTAACGTGGAAATCAGCAACCTGTTTAAAGGCA  
ACAAAATCAATGAAAATTAgtcgaccggctgctaacaagcccgaaggaagctgagttggctgctgccaccgct  
gagcaataactagc**ataaccctggggcctctaaacgggtcttgaggggtttttgctgaaag**

**DNA Sequence of NmLgtC in pJL1 Context:**

gaaat**taatacgaactcactatagg**gagaccacaacggttccctctagaagcacatagtagacacagataaggaggtcaa  
tATGGATATCGTTTTCGCGGCAGACGATAACTACGCTGCCTACCTGTGCGTGGCAGCAAA  
ATCCGTGGAAGCTGCCACCCGGATAACCGAAATCCGCTTCCACGTCCTGGACGCAGGT  
ATTAGCGAAGCGAACCGTGCCGACAGTAGCGGCGAACCTGCGTGGCGGCGGGCGGTAAC  
ATCCGCTTCATCGATGTGAACCCGGAAGATTTTGGGGCTTTCCACTGAACATCCGCCA  
TATTTCCATCACTACTTATGCGCGTCTGAAACTGGGCGAATACATCGCGGATTGCGACAA  
AGTTCTGTACCTGGATATCGATGTGCTGGTACGTGACTCTCTGACCCCGCTGTGGGACA  
CTGACCTGGGCGATAACTGGCTGGGTGCCTGTATTGACCTGTTTCGTGGAACGTCAGGA  
AGGTTACAAACAAAAAATCGGTATGGCCGATGGCGAATACTACTTCAACGCTGGCGTGC  
TGCTGATCAACCTGAAAAATGGCGTCGTCATGATTTTTCAAATGTCCTGCGAGTGGG  
TAGAACAGTATAAGGACGTTATGCAGTACCAGGACCAGGATATCCTGAACGGCCTGTTTA



AAGGTGGTGTCTGTTACGCCAACAGCCGCTTCAACTTCATGCCGACCAACTACGCGTTC  
ATGGCGAATCGCTTCGCGTCTCGTCACACCGACCTCTGTACCGTGATCGCACCAACAC  
CGTGATGCCGGTCGCGGTGTCCCCTACTGTGGTCCTGCGAAGCCATGGCACCGTGAC  
TGTACCGCTTGGGGTGTGAGCGTTTCACGGAAGTGGCTGGTAGCCTGACCACGGTCC  
CTGAAGAATGGCGCGGTAACTGGCTGTTCCGCACCGTATGTTCTCCACCAAACGCATG  
CTGCAGCGTTGGCGCCGCAAACCTGAGCGCTCGTTTCCTGCGCAAATCTATTAgtcgacc  
ggctgctaacaagcccgaaggaagctgagttggctgctgccaccgctgagcaataactagc**ataacccttggggcctcta**  
**aacgggtcttgaggggtttttgctgaaag**

#### DNA Sequence of HsSIAT1 in pJL1 Context:

gaaat**taatacgaactcactatagg**gagaccacaacggttccctctagaataatttgttaactttaagaaggagatatacatAT  
GGAGAAAAAATCTGGAGCCATCCGCAGTTCGAAAAAGGCTCCAAAGAGAAAAAAG  
GCAGCTACTACGATAGCTTCAAACCTGCAGACCAAAGAATTTAGGTTCTGAAAAGCCTG  
GGTAAACTGGCAATGGGTAGCGATAGCCAGAGCGTTAGCAGCAGCAGTACCCAGGATC  
CGCATCGTGGTCGTGAGACCCCTGGGTAGCCTGCGTGGTCTGGCAAAGCAAACCGGA  
AGCAAGCTTTCAGGTTTGAATAAAGATTCCAGCAGCAAAAATCTGATTCCGCGTCTGCA  
GAAAATCTGGAAAACTATCTGAGCATGAACAAATACAAAGTGAGCTATAAAGGTCCGGG  
TCCGGGTATCAAATTTTCAGCAGAAGCACTGCGTTGTCATCTGCGTGATCATGTTAATGT  
TAGCATGGTTGAAGTTACCGATTTTCCGTTTAATACCAGCGAATGGGAAGGTTATCTGCC  
GAAAGAAAGCATTTCGTACCAAAGCAGGTCCGTGGGGTCGTTGTGAGTTGTGAGCAGC  
GCAGGTAGCCTGAAAAGCAGCCAGCTGGGTGCGTGAATTGATGATCATGATGCAGTTCT  
GCGTTTTAATGGTGCACCCGACCGCAAACCTTTCAGCAGGATGTTGGCACCAAACCA  
TTCGTCTGATGAATAGTCAGCTGGTTACCACCGAAAAACGCTTTCTGAAAGATAGCCTGT  
ATAACGAAGGTATTCTGATTGTTTGGGATCCGAGCGTTTATCATAGCGATATTCCGAAATG  
GTATCAGAACCCGGATTACAACCTTCTTCAACAACCTATAAAACCTATCGCAAACCTGCACCC  
GAATCAGCCGTTTTATATCCTGAAACCGCAGATGCCGTGGGAACTGTGGGATATTCTGCA  
AGAAATTAGTCCGGAAGAAATTCAGCCGAATCCGCCTAGCAGCGGTATGCTGGGTATTAT  
CATTATGATGACCCTGTGTGATCAGGTGGATATCTATGAATTTCTGCCGAGCAAACGTAAA  
ACCGATGTGTGTTACTATCAGAAATTTCTCGATAGCGCCTGTACCATGGGTGCATATC  
ATCCGCTGCTGTATGAAAAAATCTGGTGAAACACCTGAATCAGGGCACCAGTGAAGATA  
TTTATCTGCTGGGTAAAGCAACCCTGCCTGGTTTTTCGTACCATTATTGTTAAgtcgaccggct  
gctaacaagcccgaaggaagctgagttggctgctgccaccgctgagcaataactagc**ataacccttggggcctcta**  
**aggtcttgaggggtttttgctgaaag**

#### DNA Sequence of PmST3,6 in pJL1 Context:

gaaat**taatacgaactcactatagg**gagaccacaacggttccctctagaataatttgttaactttaagaaggagatatacatAT  
**GGAGAAAAAATCTGGAGCCATCCGCAGTTCGAAAAAGGCTCCAA**AATCGTTCGCCTGA  
ACTTCAAACCTGTTCTTCTGATTATCTTTAGCCTGTTTAGCACCCCTGAGCTGGTCAAAAAC  
CATTACCCTGTATCTGGATCCGGCAAGCCTGCCTGCACTGAACCAGCTGATGGATTTTAC  
CCAGAATAACGAGGATAAAACCCATCCGCGTATCTTTGGTCTGAGCCGCTTTAAATCCC  
GGATAACATTATTACCCAGTACCAGAACATCCACTTCGTGGAACCTGAAAGATAACCGTCC  
GACCGAAGCACTGTTTACCATTCTGGATCAGTATCCGGGTAATATCGAACTGAACATCCA  
TCTGAATATTGCCCATAGCGTTCAGCTGATTCGTCCGATTCTGGCATATCGTTTTAAACAT

CTGGATCGTGTTAGCATTGAGCAGCTGAACCTGTATGATGATGGTAGCATGGAATATGTG  
GATCTGAAAAAGAAGAGAACAAGATATCAGCGCAGAAATCAAACAGGCAGAAAAACA  
GCTGAGCCATTATCTGCTGACCGGCAAAATCAAATTCGATAATCCGACCATTGCACGTTA  
TGTTTGGCAGAGCGCATTTCGGTTAAATATCATTTTCTGAGCACCGATTATTTTAAAAA  
GCCGAATTTCTGCAGCCGCTGAAAGAATATCTGGCAGAAAATTACCAGAAAATGGATTGG  
ACCGCATATCAGCAACTGACACCGGAACAGCAGGCATTTTATCTGACCCTGGTTGGTTTT  
AACGATGAAGTTAAACAGAGCCTGGAAGTTCAGCAGGCCAAATTTATCTTTACCGGCAC  
CACCACCTGGGAAGGTAATACCGATGTTTCGTGAATATTATGCACAGCAACAGCTGAATCT  
GCTGAATCATTTTACACAGGCCGAAGGTGACCTGTTTATTGGTGATCATTACAAAATCTAT  
TTCAAAGGTCATCCGCGTGGTGGCGAAATTAATGATTATATTCTGAACAACGCCAAAAAC  
ATCACCAACATTCCGGCAAACATTAGCTTTGAAGTGCTGATGATGACCGGTCTGCTGCC  
GGATAAAGTTGGTGGTGTGCAAGCAGCCTGTATTTTAGCCTGCCGAAAGAAAAAATCA  
GCCACATCATTTTACCAGCAACAAACAGGTGAAAAGCAAAGAAGATGCACTGAATAAC  
CCGTACGTTAAAGTTATGCGTCGTCTGGGTATTATTGATGAAAGCCAGGTGATCTTTTGG  
GATAGCCTGAAACAGCTGTAAgtcgaccggctgctaacaagccccgaaaggaagctgagttggctgctgccacc  
gctgagcaataactagc**ataaccctggggcctctaaacgggtcttgaggggtttttgctgaaag**

#### DNA Sequence of CjCST-I in pJL1 Context:

gaaat**taatac****gactcactatagg**gagaccacaacggttccctctagaataatttgttaactttaagaaggagatatacat**AT**  
**GGAGAAAAAATCTGGAGCCATCCGCAGTTCGAAAAGGCGGATCCGGAGGCAGCCAC**  
ATGACCCGTACCCGTATGGAAAATGAACTGATTGTGAGCAAAAACATGCAGAACATTATC  
ATTGCAGGTAATGGTCCGAGCCTGAAAAACATTAECTATAAACGTCTGCCTCGCGAGTAT  
GATGTTTTTTCGTTGTAACAGTTCTATTTTCGAGGATAAATACTATCTGGGCAAAAAAATCA  
AAGCCGTGTTTTTCAATCCGGGTGTTTTTCTGCAGCAGTATCATACCGCAAAACAGCTGA  
TTCTGAAAAACGAGTACGAGATCAAAAACATCTTTTGCAGCACCTTTAACCTGCCGTTTTAT  
TGAAAGCAACGATTTCTGCACCAGTTTTTACAACTTTTTCCGGATGCAAAACTGGGCTA  
TGAAGTGATTGAAAACCTGAAAGAGTTCTACGCCTATATCAAATACAACGAGATCTATTTCC  
AACAAACGCATTACCAGCGGTGTTTATATGTGTGCAATTGCCATTGCCCTGGGCTATAAA  
ACCATTTATCTGTGCGGTATCGATTTCTATGAAGGCGACGTTATTTATCCGTTTGAAGCAA  
TGAGCACCAACATTAACAATCTTCCCTGGCATCAAAGACTTCAAACCGAGCAATTGTC  
ACAGCAAAGAATATGATATTGAGGCCCTGAAACTGCTGAAAAGCATCTATAAAGTGAACAT  
CTATGCCCTGTGTGATGATAGCATTCTGGCAAATCATTTTCCGCTGAGCATTAAACATCAAC  
AACAACTTTACCCTGGAAAACAAACACAACAACAGCATCAATGATATCCTGCTGACCGAT  
AATACACCGGGTGTTAGCTTTTACAAAATCAGCTGAAAGCCGATAACAAAATTATGCTGA  
ACTTTTATTAAgtcgaccggctgctaacaagccccgaaaggaagctgagttggctgctgccaccgctgagcaataacta  
gc**ataaccctggggcctctaaacgggtcttgaggggtttttgctgaaag**

#### DNA Sequence of CjCST-II in pJL1 Context:

gaaat**taatac****gactcactatagg**gagaccacaacggttccctctagaataatttgttaactttaagaaggagatatacat**AT**  
**GGAGAAAAAATCTGGAGCCATCCGCAGTTCGAAAAGGCGGATCCGGAAAAAAGTG**  
ATCATTGCAGGTAATGGTCCGAGCCTGAAAGAAATTGATTATAGCCGTCTGCCGAACGAT  
TTTGATGTTTTTTCGTTGCAACAGTTCTATTTTCGAGGACAAATACTACCTGGGCAAAAAAAT  
GTAAAGCCGTGTTTTATAACCCGAGCCTGTTTTTGAACAGTACTATACCTGAAACATCT

GATCCAGAATCAAGAGTATGAAACCGAACTGATTATGTGCAGCAATTATAACCAGGCCCA  
TCTGGAAAATGAGAACTTTGTGAAAACCTTCTATGACTATTTTCCGGATGCACATCTGGG  
CTACGATTTTTTCAAACAGCTGAAAGATTTCAACGCCTACTTCAAATTTACGAGATCTAT  
TTAACCAGCGCATTACCAGCGGTGTTTATATGTGTGCAGTTGCAATTGCCCTGGGCTAT  
AAAGAAATTTATCTGAGCGGCATCGATTTCTATCAGAATGGTAGCAGCTATGCCTTTGACA  
CCAAACAGAAAAATCTGCTGAAACTGGCACCGAACTTCAAAAATGATAACAGCCATTATAT  
CGGCCATAGCAAAAACACCGATATTAAAGCACTGGAATTTCTGGAAAAACCTATAAAATC  
AACTGTACTGCCTGTGTCCGAATAGCCTGCTGGCAAACCTTTATTGAGCTGGCTCCGAAT  
CTGAATAGCAAATTTATCATCCAAGAGAAAAACAACCTATAACCAAGACATTCTGATTCCGA  
GCAGCGAAGCCTATGGTAAATTTAGCAAAAATATCAACTAAgtcgaccggctgctaacaagcccgaa  
aggaagctgagttggctgctgccaccgctgagcaataactagc**ataacccttggggcctctaaacgggtcttgaggggtttttg**  
ctgaaag

**DNA Sequence of SpPvg1 in pJL1 Context:**

gaaat**taatac**gact**cactatagg**gagaccacaacggtttccctctagaataatTTgtttaactttaagaaggagatatacat**AT**  
**GGAGAAAAAATCTGGAGCCATCCGCAGTTCGAAAAAGGCGGATCCGGAG**ACTTGC  
ACTTTGAAGAACCCTAGTAGTCTAACTTCTCCTTCTCGTCTACTTTCGGTTGACAAGAAA  
AAGCCCCTTTTACCAAATCACCCAGAAATAGTGCTTCTGTGAATCCACCATCACTCTG  
CAATCCAACCTACTCTTCACTTATTACAAGCATTACTTTGCAGGCATCAAGAAGGTTGCCG  
TCATTGGGTTTCTGACCACCCCAACAAGGGTGATAGTGCAATCTATGTTGCTGAGAAAA  
AGCTTTTGGATGCTTTGAATATTGAGGTTGTCTACACTGCTCAAGAGGCTGACTACTC  
TGCTTCTGAGTTGAAGTCGATCATCTCTGATATCCCCAGAGATGAGTTCGCACTTGTCTT  
CCACGGCGGTGGTAACTTTGGCGATTTATATCCTGACCATCAGCATTACGTGAACTTGT  
CGTGCGAGATTTCCCTTCTTACCACCATATCCTTCCCTCAATCTGTCTGGTATAATGAA  
CAACAACCTTCTCGAACAGGCCTCTATTTTGTATGCCGAAAATCCTAATATCACTTTGGTCA  
CTCGTGATAGGCAAAGCTATGGTTTTGCCGTTGATGCTTTTGGCAAGCATAATGAAGTTC  
TTCTTACCCCGATATCGTCTTCTTATGGGCCCATCCCTGAGATTTCGCGAGGCTACTC  
CCATCACTCATGATGTGTTGATTCTTGCTCGTCTCGATCACGAGGGTGGTCAGCAACAT  
GGTGCTGAAGACTATTATCGCGATACTTTGAATGCCGCTAACTTGACCTACAGCGTTGAG  
GATTGGCTCTTGTGGGATCCTCCTGTTGCTCAAATCCCGATTCTTCCCTTGGATGATAGA  
GGCCAAGCTCGTTACGAAGCTGGTGCGGAATTCCTTGCCTCTGCTCGCGTCGTCATTAC  
TGATCGTCTCCATGCTCACATCCTTAGCACTTTAATGGGTATTCCATATCGTCGTTGAA  
AACTCCCAAATGGGAAAAATTACTAATACTATCATAATACCTGGCTACATGGTTGCACATTGG  
ATGGTGTCAGTGTAGTCGTTGATTCCGTTGACAAGGCTTTGTCTTTGCTTCTCGAGTGG  
AATGAGGCCGGCTACTTTTAAgtcgaccggctgctaacaagcccgaaaggaagctgagttggctgctgccacc  
gctgagcaataactagc**ataacccttggggcctctaaacgggtcttgaggggtttttg**ctgaaag

**DNA Sequence of VsST3 in pJL1 Context:**

gaaat**taatac**gact**cactatagg**gagaccacaacggtttccctctagaataatTTgtttaactttaagaaggagatatacat**AT**  
**GGAGAAAAAATCTGGAGCCATCCGCAGTTCGAAAAAGGCGGATCCGGAG**GGAAATGATA  
ATAGCACCAACCAATAATAACGCCATCGAAATTTATGTTGATCGTGCAACCCTGCCGA  
CCATTCAGCAGATGACCAAAATTGTTAGCCAGAAAACCAGCAACAAAAAATGATTAGCT  
GGTCACGTTATCCGATCACCGATAAAAGCCTGCTGAAAAAATCAACGCCGAGTTTTTCA

AAGAACAGTTTGAACCTGACCGAGAGCCTGAAAAACATTATTCTGAGCGAAAACATCGATA  
ACCTGATTATTCATGGTAACACCCTGTGGTCAATTGATGTGGTGGATATTATCAAAGAAGT  
GAACCTGCTGGGTAAAAACATTCCGATTGAACTGCACTTTTATGATGATGGCAGCGCAGA  
ATATGTGCGCATTATGAATTTAGCAAACCTGCCGAAAGCGAACAGAAATACAAAACCAG  
CCTGAGCAAAAACAACATCAAATTTAGCATTGATGGCACCGATAGCTTTAAAAACACCATC  
GAAAACATTTACGGCTTCAGCCAGCTGTATCCGACCACCTACCACATGCTGCGTGCAGA  
TATTTTTGATACCACCCTGAAAATTAACCCGCTGCGTGAACCTGCTGAGCAACAACATTAAA  
CAAATGAAATGGGACTACTTCAAAGACTTCAACTATAAACAGAAAAGACATCTTTTATAGCC  
TGACCAACTTTAACCCGAAAGAGATCCAAGAGGACTTTAACAAAAACAGCAATAAAAACT  
TCATCTTCATCGGCAGCAATAGCGCAACCCGCCACCGCAGAAGAACAATTAACATTATTA  
GCGAAGCCAAAAAAGAAAACAGCAGCATTATTACCAACAGCATCAGCGATTATGACCTGT  
TCTTTAAAGGTCATCCGAGCGCAACCTTTAATGAGCAGATTATTAACGCCACGATATGAT  
CGAGATCAACAACAAAATTCCGTTTGAAGCCCTGATCATGACCGGTATTCTGCCGGATG  
CAGTTGGTGGTATGGGTAGCAGCGTGTTTTTTAGCATTCCGAAAGAGGTGAAAAACAAAT  
TCGTGTTCTATAAAAGCGGCACCGACATTGAAAACAATAGCCTGATTGAGGTTATGCTGA  
AACTGAATCTGATTAACCGCGATAACATCAAACCTGATCAGCGATATTTAAgtcgaccggctgcta  
caaagcccgaaggaagctgagttggctgctgccaccgctgagcaataactagc**ataacccttggggcctctaaacgggtctt**  
**gaggggtttttgctgaaag**

#### DNA Sequence of HpFutA in pJL1 Context:

gaaat**taatac**gact**cactatagg**gagaccacaacggttccctctagaaataattttgttaactttaagaaggagatatacatAT  
GTTCCAACCATTATTAGACGCGTTCATCGAGTCGGCCTCTATCGAGAAGATGGCGTCGA  
AGTCACCACCCCGCCCCTCAAGATCGCCGTGGCCAACTGGTGGGGAGACGAGGAGA  
TTAAGGAATTTAAGAAGTTTTGTTTTGTACTTCATTTTGTAGTCAACGCTACGCGATCACTTT  
GCACCAAACCCTAACGAGTTCTCGGACTTAGTCTTCTCAAACCCTCTTGGCGCGGCCC  
GCAAGATCTTGAGTTACCAAACACGAAGCGTGTTTTCTACACAGGCGAGAACGAGTCC  
CCAAATTTAATTTGTTGACTACGCGATCGGCTTTGACGAACTTGACTTCAACGACCGC  
TACTTGCGCATGCCTTTATACTACAATGAGTTACACATCAAGGCAGAACTCGTGAACGAC  
ACTACTGCGCCTTACAAGTTGAAGGACAACAGTTTATATGCGCTCAAGAAGCCTAGTCAC  
CACTTCAAGGAGAATCACCTAACCTCTGCGCTGTGCTCAACGACGAGTCGGACCTGC  
TCAAGCGCGGCTTCGCGTCGTTGTTGGCGTCTAACGCGAACGCCCAATGCGCAACGC  
TTTCTACGACGCACTCAACAGTATCGAGCCTGTGACAGGCGGCGGCGAGTGTGCGCAAC  
ACTTTAGGCTACAAGGTAGGTAATAAGTTCGGAGTTCCTCTCGCAATACAAGTTTAACTTGT  
GTTTTGAGAATAGTCAGGGCTACGGCTACGTTACGGAGAAGATCCTTGACGCGTACTTTT  
CACACACTATCCCTATCTACTGGGGCTCCCCTTCTGTGCGCAAGGACTTTAACCCAAAGT  
CGTTCGTCAATGTTTCATGACTTTAATAATTTGACGAGGCAATTGATTATATTAAGTATCTC  
CACACTCACCCCAACGCTTACCTTGACATGTTGTACGAGAACCCTCTCAACACCCTCGA  
CGGAAAGGCGTACTTTTACCAAGACCTGAGTTTTAAGAAGATTTTGGATTTCTTCAAAC  
TATTCTGGAAAACGACACTATTTACCATAAGTTCTCCACGAGTTTTATGTGGGAGTACGAC  
TTGCACAAGCCACTCGTCTCAATCGACGACTTGCAGGTTAACTACG**GTAGTTCGGCATG**  
**GTACACACCCCAATTTGAGAAGGGAGGAGGAGTGGAGGAGGCAGCGGCGGCGAGTG**  
**CCTGGTCGCACCCCAATTTGAGAAGTGA**gtcgaccggctgctaacaagcccgaaggaagctgagttg  
gctgctgccaccgctgagcaataactagc**ataacccttggggcctctaaacgggtcttgaggggtttttgctgaaag**

**DNA Sequence of HpFutC in pJL1 Context:**

gaaat**taatac**gact**cactataggg**gagaccacaacggtttccctctagaaataatttgtttaactttaagaaggagatatacat**ATGGAGAAAAAATCTGGAGCCATCCGCAGTTCGAAAAAGGCGGATCCGGAGCCTTTAAA**  
GTTGTT**CAGATTTGTGGTGGTCTGGGCAATCAGATGTTTCAGTATGCATTTGCAAAAAGC**  
CTGCAGAAACATAGCAATACACCGGTTCTGCTGGATATTACCAGCTTTGATTGGAGCGAT  
CGTAA**ATGCAGCTGGA**ACTGTTTCCGATTGATCTGCCGTATGCAAGCGCAAAAGAAAT  
GCCATTGCAAAGATGCAGCATCTGCCGAAACTGGTTCGTGATGCACTGAAATGTATGGG  
TTTTGATCGTGTGAGCCAAGAAATCGTGT**TTGAATATGAACCGAAACTGCTGAAACCGAG**  
CCGTCTGACCTATTTTTTCGGTTATTTTCAAGATCCGC**GTTACTTCGATGCAATTAGTCCG**  
CTGATTAACAGACCTTTACACTGCCTCCGCCTCCG**GAAAATAACAAAAACAACAATAAG**  
AAAGAAGAGGAATATCAGT**GCAAGCTGAGCCTGATTCTGGCAGCAAAAAATAGCGTTTTT**  
GTGCATATTCGT**CGCGGTGATTATGTTGGTATTGGTTGTCAGCTGGGTATCGACTATCAG**  
AAAAAGCACTGGAATATATGGCAAACGTGTGCCGAATATG**GAACTTTTTGTTTTTTGTG**  
AGGACCTGGAATTTACCCAGAATCTGGATCTGGGCTATCCGTTTATGGATATGACCACAC  
GTGATAAAGAAGAAGAGGCCTATTGGGATATGCTGCTGATGCAGAGCTGTCAGCATGGT  
ATTATTGCAAATAGCACCTATAGTTGGTGGGCAGCCTATCTGATTGAAATCCGGAAAAAA  
TCATCATCGGTCCGAAACATTGGCTGTTTGGCCATGAAACATTCTGTGTAAAGAATGGG  
TGAAATCGAAAGCCACTTTGAAGTGAAAAGCCAGAAATATAACGCCTAAg**tcgaccggctgct**  
aacaagcccgaaggaagctgagttggctgctgccaccgctgagcaataactagc**ataacccttggggcctctaaacgggt**  
**cttgagggggttttctg**gaaag

**DNA Sequence of BtGGTA in pJL1 Context:**

gaaat**taatac**gact**cactataggg**gagaccacaacggtttccctctagaaataatttgtttaactttaagaaggagatatacat  
**ATGGAGAAAAAATCTCTGCGTGGAGCCATCCGCAGTTCGAAAAAGGATCCGAGTCTAA**  
ACTGAAACTGTCTGACTGGTTTAAACCCGTTTAAACGCCCGGAAGTAGTGACTATGACCAA  
ATGGAAAGCTCCGGTGGTTTGGGAAGGCACCTACAACCGCGCAGT**TCTGGACAATTACT**  
ATGCAAAACAAAAAATCACTGTTGGTCTGACCGTATTTGCCGTTGGCCGTTACATTGAGC  
ATTACCTGGAAGAATCCTGACCAGCGCAAACAAACACTT**CATGGTGGGCCACCCTGTT**  
ATCTTCTATATTATGGTAGATGATGTTAGCCGTATGCCGCTGATTGAACTGGGCCCGCTGC  
GTTCC**TTCAAAGTCTTCAAGATCAAACCGGAAAAACGCTGGCAGGACATCTCCATGATG**  
CGCATGAAAACCATCGGTGAACACATCGTGGCACATATTCAACACGAAGTCGATTTTCTG  
TTCTGCATGGATGTTGATCAGGTTTTCCAGGATAAATTCCGGCGTTGAAACCCTGGGTGA  
GAGCGTGGCACAGCTGCAGGCGTGGTGGTACAAGGCGGACCCGAACGATTT**CACCTAT**  
GAACGTCGTAAAGAAAGCGCCGCTTACATTCCGTTTGGTGAAGGCGATTTCTATTATCAC  
GCGGCGATTTTTGGCGGTACCCCGACCCAAGTTCTGAACATCACCCAGGAATGCTTCAA  
AGGCATTCTGAAAGACAAAAAAACGATATCGAAGCACAGTGGCATGACGAATCTCAC  
TGAACAAATATTTCTGCTGAACAAACCGACCAAAT**TCTGTCTCCGGAATATTGTTGGG**  
ACTATCACATCGGTCTGCCGGCCGACATCAA**ACTGGTGAAAATGTCTTGGCAGACGAAA**  
GAATATAACGTAGTACGTAACAATGTCTAAg**tcgaccggctgctaacaagcccgaaggaagctgagttgg**  
ctgctgccaccgctgagcaataactagc**ataacccttggggcctctaaacgggtcttgagggggttttctg**gaaag

**DNA Sequence of HdGlcNAcT in pJL1 Context:**

gaaat**taatac**gactcactataggagaccacaacggttccctctagaaatctagataaataaggaggtataaaATGACTA  
CCCTGGTGTCTGTGCTGATTTGCGCTTACAACGTCGAAAAATATATCGATGAGTGTCTGA  
ACGCCGTCATTGCACAGACTTACAAAAACCTGGAAATCATTGTTGTAACGACGGCTCCA  
CGGATGGCACTCTGGCTAAACTGCGCCAGTTGAGGCGAAAGATCCACGCGTAAAAAT  
CATTGACAACATTGTAAACCAGGGTACTTCTAAGTCTCTGAATATCGGTATCCAGTACTGT  
CAGGGCGAAATTATCGCACGTACCGACTCCGATGATATCGTGGACATCCATTGGATTGAA  
ACGCTGATGCGTGAGCTGGACAATTCCCCGGAAACTATCGCTATCTCTGCGTACCTGGA  
ATTCTGGCGGAGAAAGGTAACGGTAGCAAACGTCCCGCTCTCGTAAACATGGCAAGA  
ATGCAGAGAACCCGATCAGCAGCGAGGCGATCTCCAGCGTATGCTGTTCCGGTAATCC  
GGTTCACAACAACGTCGCACTGGTGCCTCGTAAAGTATTCTCCGAGTACGGTCTGCGTT  
TCGACCCGGACTATATCCACGCTGAAGACTATAAATTCTGGTTCGAAGTAAGCAAACCTGG  
GCAAGATGCGTACTTACCCAAAAGCGCTGGTTAAATACCGTCTGCACGCTACCCAGGTT  
AGCAGCGCATATAACCAGAAACAGCGTTCTATTGCAAAAAAATCAAACGTGAGGCCATC  
TCTCATTACCTGCAGCAGTACGGCATTGAGCTGCCGAAAAACTGACTATCCACGACCT  
GTTCTCTATCTTCTCCCGCAGATTGAACTGAGCCTGACCGTTGCGAACAAACAGGAAC  
TGTTCTGGTCTCTGGCAACTTCTCTGTCTGAATATCACTTCCGTGATCTGCTGAAAATCTA  
TTCCCTGGATATCTTCCACCAACTGTCCTTCAAATACAAAAGCGCATTTTTCGTAAGTTC  
CTGCTGCCGAACCGCTACCCATCTGTAATCTAAgtcgaccggctgctaacaagcccgaaggaagctg  
agttggctgctgccaccgctgagcaataactagc**ataaccctggggccttaaacgggtcttgaggggtttttgctgaaag**

**DNA Sequence of NgLgtA in pJL1 Context:**

gaaat**taatac**gactcactataggagaccacaacggttccctctagaaataatgttgaacttaagaaggagatatacatAT  
GCCGAGCGAAGCATTTCGTGTCATCGTGCATATCGTGAAAACAACTGCAGCCGCTGG  
TTAGCGTTCTGATTTGTGCATATAATGTGGAAAATACTTTGCCAGAGCCTGGCAGCAG  
TTGTTAATCAGACCTGGCGTAATCTGGATATTCTGATTGTTGATGATGGTAGCACCGATGG  
CACCTGGCAATTGCACAGCGTTTTCAAGAACAGGATGGTCGTATTCTGATTCTGGCAC  
AGCCTCGTAATAGCGGTCTGATTCCGAGCCTGAATATTGGTCTGGATGAACTGGCAAAAA  
GCGGTGGTGGTGGCGAATATATTGCACGTACCGATGCAGATGATATTGCAGCACCGGAT  
TGGATTGAAAAAATTGTGGGTGAGATGGAAAAGATCGCAGCATTATTGCAATGGGTGCA  
TGGCTGGAAGTTCTGAGCGAAGAAAAGATGGTAATCGTCTGGCACGTCATCATGAACA  
TGGTAAAATTTGAAAAAACCGACGCGTCATGAAGATATCGCAGATTTTTTTCCGTTTGG  
CAACCCGATTCATAACAACACCATGATTATGCGTCGTAGCGTTATTGATGGTGGTCTGCG  
TTATAATACCGAACGTGATTGGGCAGAAGATTATCAGTTTTTGGTATGATGTTAGCAAACCTG  
GGTCGTCTGGCCTATTATCCGGAAGCACTGGTTAAATATCGCCTGCATGCAAATCAGGTT  
AGCAGCAAATATAGCATTCCGCCAGCATGAAATTGCCAGGGTATTCAGAAAACCGCACGT  
AATGATTTTCTGCAGAGCATGGGCTTTAAACCCGTTTTGATAGCCTGGAATATCGCCAG  
ATTAAAGCAGTTGCCTATGAACTGCTGGAAAAGCATCTGCCGGAAGAAGATTTTGAACG  
CGCACGTCGTTTTCTGTATCAGTGTTTTAAACGCACCGATACTGCCTGCCGGTGCAT  
GGTTAGATTTTGCAGCAGATGGTGCATGCGTCTGTTTACCCTGCGTCAGTATTTTG  
GTATTCTGCATCGTCTGCTGAAAAACCGTTAAgtcgaccggctgctaacaagcccgaaggaagctgag  
ttggctgctgccaccgctgagcaataactagc**ataaccctggggccttaaacgggtcttgaggggtttttgctgaaag**

**DNA Sequence of PdST6 in pJL1 Context:**

gaaat**taatac**gactcactataggagaccacaacggttccctctagaaataat**ttgttaactttaagaaggagatatacatAT**  
GGAGAAAAAATCTGGAGCCATCCGCAGTTCGAAAAAGGCGGATCCGGACTGGTCCG  
CGTGGTAGCCACATGTGTAATAGCGATAACACCAGCCTGAAAGAAACCGTTAGCAGCAA  
TAGCGCAGATGTTGTTGAAACCGAAACCTATCAGCTGACCCCGATTGATGCACCGAGCA  
GCTTTCTGAGCCATAGCTGGGAACAGACCTGTGGCACCCCGATTCTGAATGAAAGCGAT  
AAACAGGCAATCAGCTTTGATTTTGTTCACCCGGAACCTGAAACAGGATGAGAAATATTGC  
TTTACCTTCAAAGGCATTACCGGTGATCATCGTTATATTACCAATACCACCCTGACCGTTG  
TGGCACCGACCCTGGAAGTTTATATTGATCATGCAAGCCTGCCGAGCCTGCAGCAGCTG  
ATTCATATTATTCAGGCCAAAGATGAATATCCGAGCAATCAGCGTTTTGTTAGCTGGAAAC  
GTGTTACCGTTGATGCAGATAATGCCAACAACTGAACATTCATACCTATCCGCTGAAAG  
GCAATAATACCAGTCCGGAAATGGTTGCAGCAATTGATGAATATGCACAGAGCAAAAATC  
GCCTGAACATCGAGTTTTATACCAATACAGCCCACGTGTTAATAACCTGCCTCCGATTAT  
TCAGCCGCTGTATAATAACGAGAAAGTGAAAATTAGCCACATCAGCCTGTATGATGACGG  
TAGCAGCGAATATGTTAGCCTGTATCAGTGGAAAGATACCCCGAACAAAATTGAAACACT  
GGAAGGTGAAGTTAGCCTGCTGGCAAATTATCTGGCAGGCACCTCACCGGATGCTCCG  
AAAGGTATGGGTAATCGTTATAATTGGCACAACTGTATGACACCGACTATTACTTTCTGC  
GCGAAGATTATCTGGATGTTGAAGCAAATCTGCATGATCTGCGTGATTACCTGGGTAGCA  
GTGCAAAACAAATGCCGTGGGATGAATTTGCAAACTGAGCGATAGCCAGCAGACCCTG  
TTTCTGGATATTGTTGGTTTTGATAAAGAACAGCTGCAGCAACAGTATAGCCAGAGTCCG  
CTGCCGAATTTTATCTTTACCGGCACCACCACCTGGGCAGGCGGTGAAACCAAAGAATA  
TTATGCCCAGCAGCAGGTTAACGTGATTAACAATGCAATTAATGAAACCAGCCCGTACTAT  
CTGGGTAAAGATTATGACCTGTTTTTCAAAGGTCATCCTGCCGGTGGTGTGATTAATGAT  
ATTATTCTGGGTAGCTTCCCGGATATGATTAACATTCCGGCAAAAATTAGCTTTCGAGGTT  
TGATGATGACCGATATGCTGCCGGATACCGTTGCAGGTATTGCAAGCAGTCTGTATTTCA  
CAATCCGGCAGATAAAGTGAACCTCATTGTTTTTACCAGCAGCGATAACCATTACCGATC  
GTGAAGAAGCACTGAAAAGTCCGCTGGTTCAGGTTATGCTGACCCTGGGTATTGTTAAA  
GAAAAGATGTTCTGTTTTGGGCATAAgtcgaccggctgctaacaagcccgaaggaagctgagttggctg  
ctgccaccgctgagcaataactagc**ataaccctggggcctctaaacgggtcttgaggggtttttgctg**aaag

**DNA Sequence of PIST6 in pJL1 Context:**

gaaat**taatac**gactcactataggagaccacaacggttccctctagaaataat**ttgttaactttaagaaggagatatacatAT**  
GGAGAAAAAATCTGGAGCCATCCGCAGTTCGAAAAAGGCGGATCCGGAGGATGTAAT  
GATAATCAGAATACCGTTGATGTTGTTGTGAGCACCGTGAATGATAACGTGATTGAAAATA  
ACACCTACCAGGTGAAACCGATTGATACCCCGACCACCTTTGATAGCTATAGTTGGATTC  
AGACCTGTGGCACCCCGATTCTGAAAGATGATGAGAAATATAGCCTGAGCTTTGATTTTG  
TTGCACCGGAACTGGATCAGGATGAAAAATTCTGTTTTGAGTTTACCGGTGATGTGGATG  
GTAAACGTTATGTTACCCAGACCAATCTGACCGTTGTGGCACCGACCCTGGAAGTTTATG  
TTGATCATGCAAGCCTGCCGAGCCTGCAGCAGCTGATGAAAATTATCCAGCAGAAAAAC  
GAGTATAGCCAGAACGAACGTTTTATTAGCTGGGGTTCGTATTGGTCTGACCGAAGATAAT  
GCCGAAAAACTGAATGCACATATTTATCCGCTGGCAGGTAATAATACCAGCCAAGAACTG  
GTTGATGCCGTTATTGATTATGCCGATAGCAAAAATCGTCTGAACCTGGAACCTGAATACCA  
ATACCGCACATAGCTTTCCGAATCTGGCACCGATTCTGCGTATTATTAGCAGCAAAAAGCA  
ATATCCTGATCAGCAACATTAACCTGTATGATGATGGTAGCGCAGAATATGTGAATCTGTAT

AACTGGAAAGACACCGAGGATAAAAGCGTTAAACTGAGCGATAGCTTTCTGGTGCTGAA  
AGATTATTTCAATGGCATCAGCAGCGAAAAACCGAGCGGTATTTATGGTCGTTATAATTGG  
CACCAGCTGTATAACACCAGCTATTACTTTCTGCGCAAAGATTATCTGACAGTTGAACCG  
CAGCTGCATGATCTGCGTGAATATCTGGGTGGTAGCCTGAAACAAATGAGCTGGGATGG  
TTTTAGCCAGCTGAGCAAAGGTGATAAAGAACTGTTTCTGAACATCGTGGGCTTCGATCA  
AGAAAAACTGCAGCAAGAATATCAGCAGAGCGAACTGCCGAATTTTGTTTTTACCGGCA  
CCACCACCTGGGCAGGCGGTGAAACCAAAGAATATTATGCACAGCAGCAGGTTAACGTG  
GTGAATAATGCAATTAATGAAACCAGCCCGTATTATCTGGGTCGTGAACATGACCTGTTTT  
TCAAAGGTCATCCGCGTGGTGGTATTATCAACGATATTATTCTGGGCAGCTTCAACAACAT  
GATTGACATTCCGGCAAAGTCAGCTTTGAAGTTCTGATGATGACCGGTATGCTGCCGG  
ATACCGTGGGTGGTATTGCAAGCAGCCTGTATTTTTCAATTCCGGCAGAAAAAGTGAGCT  
TCATTGTGTTTACCAGCAGCGATACCATTACCGATCGTGAAGATGCACTGAAAAGTCCGC  
TGTTTCAGGTTATGATGACCCTGGGTATTGTGAAAGAAAAAGATGTGCTGTTTTGGAGC  
GATCTGCCGGATTGTAGCAGCGGTGTTTGTATTGCACAGTATTAAGtcgaccggctgctaacaag  
cccgaaaggaagctgagttggctgctgccaccgctgagcaataactagc**ataacccttggggcctctaaacgggtcttgagg**  
**gTTTTTgctgaaag**

**DNA Sequence of PpST3 in pJL1 Context:**

gaaat**taatacgaactcactatagg**gagaccacaacggttccctctagaataatTTgtttaactttaagaaggagatatacatAT  
GGGAAAAAACAAAACCATCGAAGTTTATGTTGATCGTGCAACCCTGCCGACCATTTCAGC  
AGATGACCCAGATTATTAACGAAAACAGCAACAACAAAAAACTGATCAGCTGGTCACGCT  
ATCCGATTAATGATGAAACCCTGCTGGAAAGCATTAAACGGCAGCTTTTTCAAAAATCGTC  
CGGAACTGATTAAGCCTGGATAGCATGATTCTGACCAACGAGATCAAAAAGTGATTA  
TCAATGGCAATACCCTGTGGGCAGTTGATGTTGTGAATATCATTAAAAGCATTGAGGCC  
TGGGCAAAAAACCGAAATTGAACTGAACTTCTATGATGATGGCAGCGCAGAATATGTT  
GCCTGTATGATTTTAGCCGTCTGCCGGAAAGCGAACAAGAATACAAAATTAGCCTGAGCA  
AAGACAACATTCAGAGCAGCATTAAATGGCACCCAGCCGTTTGATAATAGCATCGAAAACA  
TTTATGGCTTTAGCCAGCTGTATCCGACCACCTACCACATGCTGCGTGCAGATATCTTTG  
AAACCAATCTGCCGCTGACCAGCCTGAAACGTGTTATTAGCAATAATATCAAACAAATGAA  
ATGGGATTACTTCACCACCTTCAATAGCCAGCAGAAAAACAAATTCTATAACTTTACCGGC  
TTTAACCCGGAAAAAATCAAAGAGCAGTATAAAGCAAGTCCGCACGAAAACCTTTATCTTTA  
TTGGCACCAATAGCGGCACCGCAACCGCAGAACAGCAGATTGATATTCTGACCGAAGCC  
AAAAACCGGATAGCCCGATTATTACCAATAGCATTGAGGTCTGGACCTGTTTTTCAA  
GGTCATCCGAGCGCAACCTATAACCAGCAGATTATTGATGCCATAACATGATCGAGATC  
TATAACAAAATTCCGTTTCAAGCCCTGATTATGACCGATGCACTGCCGGATGCAGTTGGT  
GGTATGGGTAGCAGCGTGTTTTTTAGCCTGCCGAATACCGTGGAAAACAAATTTATCTTC  
TACAAAAGCGACACCGACATTGAAAACAATGCACTGATTGAGGTGATGATCGAACTGAAT  
ATTGTGAATCGCAACGACGTGAAACTGATTAGCGATCTGCAGTAAgtcgaccggctgctaacaaa  
gccccgaaaggaagctgagttggctgctgccaccgctgagcaataactagc**ataacccttggggcctctaaacgggtcttgagg**  
**gTTTTTgctgaaag**

**DNA Sequence of H1HA10 in pJL1 Context:**

gaaat**taatacgaactcactatagg**gagaccacaacggttccctctagaataatTTgtttaactttaagaaggagatatacat



ATGGAGAAAAAATCCATCACCATCATCACCATGGTAGCAAAGCGACTACCGGAGGTAA  
CTGGACAACAGCTGGCGGCAAAGGATCCGATACCGTTGATACCGTGCTGGAAAAAAT  
GTTACCGTTACACATAGCGTGAACCTGCTGGAAGATAGCCATCGTAGCGCAAATAGCAG  
CCTGCCGTATCAGAATACCCATCCGACCACCAATGGTGAAAGCCCGAAATATGTTTCGTAG  
CGCCAAACTGCGTATGGTTACCGGTCTGCGTAATGGTAGCGCAGGTAGCGCGACCCAG  
AATGCAATTAATGGTATTACCAATAAGGTGAACACCGTGATCGAGAAAATGAACATTCAGG  
ATACCGCAACCGGCAAAGAATTTAACAAAGATGAAAAGCGCATGGAAAACCTGAACAAA  
AAAGTGGATGATGGCTTTCTGGATATCTGGACCTATAATGCAGAACTGCTGGTGTACTG  
GAAAACGAACGTACCCTGGATGCACATGATAGCCAAGGCACCGGTGGTGGTTATATTCC  
GGAAGCACCGCGTGATGGTCAGGCCTATGTTCTGTAAGATGGTGAATGGGTTCTGCTGA  
GCACCTTTCTGTAAgtcgaccggctgctaacaagcccgaaggaagctgagttggctgctgccaccgctgagcaat  
aactagc**ataaccctggggccttaacgggtcttgaggggtttttgct**gaaag

**DNA Sequence of ApNGT in pMAF10 Context:**

ttgctatgccatagcattttatccataagattagcggatcctacctgacgctttttatcgcaactctctactgtttctccatacccggtttttt  
gggctagcaggaggaattccATGGAAAACGAGAATAAACCGAACGTGGCAAATTTTGAAGCAGCA  
GTTGCAGCCAAAGATTATGAAAAAGCATGTAGCGAGCTGCTGCTGATTCTGAGCCAGCT  
GGATAGCAATTTTGGTGGCATTATGAAATCGAGTTCGAGTACCCAGCTCAGCTGCAGG  
ATCTGGAGCAGGAAAAAATTGTGTACTTTTGCACCCGTATGGCGACTGCCATCACCACC  
CTGTTCTCTGACCCGTTCTGGAAATCTCCGACCTGGGTGTGCAGCGTTTCCTGGTTTA  
TCAGCGTTGGCTGGCGCTGATCTTCGCTAGCAGCCCGTTCGTGAACGCAGACCACATC  
CTGCAGACTTACAACCGTGAACCGAACCGCAAAAACCTCCCTGGAAATTCACCTGGACTC  
TAGCAAGTCCTCTCTGATTAATTTTGCATCCTGTACCTGCCGGAATCTAATGTGAACCTG  
AATCTGGATGTGATGTGGAACATTTCCCGGAGCTGTGTGCCTCTCTGTGCTTTTGCCT  
GCAAAGCCCGCGTTTTGTTGGCACCAGCACCGCCTTTAACAAACGCGCGACCAATTCTG  
CAGTGGTTCCCGCGTCATCTGGACCAGCTGAAAAACCTGAACAACATCCCGTCCGCTAT  
CTCTCATGACGTGTATATGCACTGTTCTTACGACACCAGCGTTAACAAAGCACGATGTTAA  
GCGCGCGCTGAATCACGTGATTCGTGCGCCACATCGAATCCGAATACGGTTGGAAAGATC  
GTGATGTGGCTCACATCGGTTATCGCAACAACAAACCGGTTATGGTCGTTCTGCTGGAA  
CATTTTCATAGCGCGCACTCTATCTACCGTACTCACTCTACCAGCATGATCGCCGCGCGC  
GAACACTTCTATCTGATCGGCCTGGGTTCCCGAGCGTTGACCAGGCCGGTCAGGAGG  
TTTTCGATGAATCCACCTGGTAGCGGGTGACAACATGAAGCAAAAACCTGGAATTCATTC  
GTTCTGTGTGCGAAAGCAATGGTGC GGCAATTTTCTACATGCCGAGCATCGGTATGGATA  
TGACCACCATCTTCGCGTCCAATACCCGTCTGGCGCCGATTCAGGCAATCGCCCTGGG  
CCACCCGGCGACTACTCACTCCGACTTCATTGAATACGTTATCGTGGAAGACGACTACG  
TCGGCTCTGAGGAATGCTTCTCTGAAACCCTGCTGCGTCTGCCGAAAGACGCTCTGCC  
GTATGTTCCGTCCGCCCTGGCTCCGGAGAAAGTTGATTACCTGCTGCGTGAAAACCCTG  
AAGTTGTCAACATCGGTATTGCCTCTACCACTATGAAGCTGAACCCGTACTTCCTGGAAG  
CACTGAAGGCCATTCGTGACCGTGCGAAGGTGAAAGTGC ACTTCCACTTCGCACTGGG  
CCAGTCCAATGGTATCACTCACCTTACGTTGAACGCTTTATCAAATCTTACCTGGGCGA  
CAGCGCTACCGCGCACCCGCACTCTCCGTACCACCAGTACCTGCGTATTCTGCACAACT  
GCGATATGATGGTAAACCCTTTTCCGTTTGGTAATACCAATGGTATTATTGACATGGTAAC  
CCTGGGTCTGGTAGGTGTTTGCAAACCGGTGCGGAAGTCCACGAACATATCGATGAAG

GCCTGTTCAAACGTCTGGGCCTGCCGGAATGGCTGATTGCAAACACCGTGGACGAATA  
CGTGGAACGTGCAGTGCGCCTGGCCGAGAACCATCAGGAACGTCTGGAACCTGCGTCG  
TTACATTATTGAAAACAATGGCCTGAACACCCTGTTACCGGCGACCCACGCCCGATGG  
GTCAGGTGTTCTGGAAAACTGAACGCATTCTGAAGGAAAACGGCGGCGACTACAA  
GGACGATGACGACAAGGGATAAaagcttggctgttttggcggatgagagaagattttcagcctgatacagattaat  
cagaac

**DNA Sequence of NmLgtB.ApNGT in pMAF10 Context:**

ttgctatgccatagcattttatccataagattagcggatcctacctgacgctttttatcgcaactctactgtttctccatacccggtttttt  
gggctagcaggaggaattccATGGAAAACGAGAATAAACCGAACGTGGCAAATTTTGAAGCAGCA  
GTTGCAGCCAAAGATTATGAAAAAGCATGTAGCGAGCTGCTGCTGATTCTGAGCCAGCT  
GGATAGCAATTTTGGTGGCATTTCATGAAATCGAGTTCGAGTACCCAGCTCAGCTGCAGG  
ATCTGGAGCAGGAAAAAATTGTGTACTTTTGCACCCGTATGGCGACTGCCATCACCACC  
CTGTTCTCTGACCCGGTTCTGGAAATCTCCGACCTGGGTGTGCAGCGTTTCCTGGTTTA  
TCAGCGTTGGCTGGCGCTGATCTTCGCTAGCAGCCCGTTCGTGAACGCAGACCACATC  
CTGCAGACTTACAACCGTGAACCGAACCGCAAAAACCTCCCTGGAAATTCACCTGGACTC  
TAGCAAGTCCTCTCTGATTAATTTTGCATCCTGTACCTGCCGGAATCTAATGTGAACCTG  
AATCTGGATGTGATGTGGAACATTTCCCGGAGCTGTGTGCCTCTCTGTGCTTTGCGCT  
GCAAAGCCCGCGTTTTGTGGCACCAGCACCGCCTTTAACAAACGCGCGACCATTCTG  
CAGTGGTTCCCGCGTCATCTGGACCAGCTGAAAAACCTGAACAACATCCCGTCCGCTAT  
CTCTCATGACGTGTATATGCACTGTTCTTACGACACCAGCGTTAACAAAGCACGATGTTAA  
GCGCGCGCTGAATCACGTGATTCGTCGCCACATCGAATCCGAATACGGTTGGAAAGATC  
GTGATGTGGCTCACATCGGTTATCGCAACAACAACCGGTTATGGTCGTTCTGCTGGAA  
CATTTTCATAGCGCGCACTCTATCTACCGTACTCACTCTACCAGCATGATCGCCGCGCGC  
GAACACTTCTATCTGATCGGCCTGGGTTCCCGAGCGTTGACCAGGCCGGTCAGGAGG  
TTTTCGATGAATCCACCTGGTAGCGGGTGACAACATGAAGCAAAAACCTGGAATTCATTC  
GTTCTGTGTGCGAAAGCAATGGTGCGGCAATTTTCTACATGCCGAGCATCGGTATGGATA  
TGACCACCATCTTCGCGTCCAATACCCGTCTGGCGCCGATTCAGGCAATCGCCCTGGG  
CCACCCGGCGACTACTCACTCCGACTTCATTGAATACGTTATCGTGGAAGACGACTACG  
TCGGCTCTGAGGAATGCTTCTCTGAAACCCTGCTGCGTCTGCCGAAAGACGCTCTGCC  
GTATGTTCCGTCCGCCCTGGCTCCGGAGAAAGTTGATTACCTGCTGCGTGAAAACCCTG  
AAGTTGTCAACATCGGTATTGCCTCTACCACTATGAAGCTGAACCCGTAATTCTGGAAG  
CACTGAAGGCCATTCTGACCGTGCGAAGGTGAAAGTGCACTTCCAATTCTGCACTGGG  
CCAGTCCAATGGTATCACTCACCCCTTACGTTGAACGCTTTATCAAATCTTACCTGGGCGA  
CAGCGCTACCGCGCACCCGCACTCTCCGTACCACCAGTACCTGCGTATTCTGCACAAC  
GCGATATGATGGTAAACCCTTTTCCGTTTGGTAATACCAATGGTATTATTGACATGGTAAC  
CCTGGGTCTGGTAGGTGTTTGCAAACCCGGTGCGGAAGTCCACGAACATATCGATGAAG  
GCCTGTTCAAACGTCTGGGCCTGCCGGAATGGCTGATTGCAAACACCGTGGACGAATA  
CGTGGAACGTGCAGTGCGCCTGGCCGAGAACCATCAGGAACGTCTGGAACCTGCGTCG  
TTACATTATTGAAAACAATGGCCTGAACACCCTGTTACCGGCGACCCACGCCCGATGG  
GTCAGGTGTTCTGGAAAACTGAACGCATTCTGAAGGAAAACGGCGGCGACTACAA  
GGACGATGACGACAAGGGATAAgttaccctcgaggataaggaggataagATGGAGAAAAAATCTC  
TGCGTGGAGCCATCCGCAGTTCGAAAAAGGATCCAGAACCATGTTATTAGCCTGGCAA

GCGCAGCAGAACGTCGTGCACATATTGCAGATACCTTTGGTCGTCATGGTATTCCGTTTT  
AGTTTTTTGATGCACTGATGCCGAGCGAACGTCTGGAACAGGCAATGGCAGAAGTGGTT  
CCGGGTCTGAGCGCACATCCGTATCTGAGCGGTGTTGAAAAAGCATGTTTTATGAGCCA  
TGCAGTTCTGTGGAACAGGCACTGGATGAAGGTCTGCCGTATATTACCGTTTTTTGAAGA  
TGATGTTCTGCTGGGTGAAGGTGCAGAAAAATTTCTGGCAGAAGATGCCTGGCTGCAAG  
AACGTTTTGATCCGGATACCGCATTATTGTTTCGTCTGGAAACCATGTTTATGCATGTTCT  
GACCAGCCCAGCGGTGTGGCAGATTATTGTGGTCGTGCATTTCCGCTGCTGGAAAGC  
GAACATTGGGGCACCGCAGGTTATATCATTAGCCGTAAAGCAATGCGCTTTTTTTCTGGAT  
CGTTTTGCAGCACTGCCTCCGGAAGGCCTGCATCCGGTTGATCTGATGATGTTTAGCGA  
TTTTTTTTGATCGTGAAGGTATGCCGTTTTGTCAGCTGAATCCGGCACTGTGTGCACAAG  
AACTGCACTATGCAAATTTTCATGATCAGAATAGCGCACTGGGTAGCCTGATTGAACATG  
ATCGTCTGCTGAATCGTAAACAGCAGCGTCGTGATAGTCCGGCAAATACCTTTAAACATC  
GTCTGATTCGTGCCCTGACCAAATTAGCCGTGAACGTGAAAAACGTCGTCAGCGTCGC  
GAACAGTTTATTGTGCCGTTTCAGTAAaagcttggctgtttggcggatgagagaagattttcagcctgatacag  
attaaatcagaac

**DNA Sequence of CjCST-I.NmLgtB.ApNGT in pMAF10 Context:**

ttgctatgccatagcattttatccataagattagcggatcctacctgacgctttttatcgcaactctctactgttctccataccggtttttt  
gggctagcaggaggaattccATGGAGAAAAAATCTGGAGCCATCCGCAGTTCGAAAAAGGCGG  
ATCCGGAGGCAGCCACATGACCCGTACCCGTATGGAAAATGAACTGATTGTGAGCAAAA  
ACATGCAGAACATTATCATTGCAGGTAATGGTCCGAGCCTGAAAAACATTAATAAACC  
TCTGCCTCGCGAGTATGATGTTTTTCGTTGTAACCAGTTCTATTTTCGAGGATAAATACTAT  
CTGGGCAAAAAATCAAAGCCGTGTTTTTCAATCCGGGTGTTTTTCTGCAGCAGTATCAT  
ACCGCAAAACAGCTGATTCTGAAAAACGAGTACGAGATCAAAAACATCTTTTGCAGCAC  
CTTTAACCTGCCGTTTATTGAAAGCAACGATTTCTGCACCAGTTTTACAACTTTTTTCCG  
GATGCAAAACTGGGCTATGAAGTGATTGAAAACCTGAAAGAGTTCTACGCCTATATCAA  
TACAACGAGATCTATTTCAACAAACGCATTACCAGCGGTGTTTATATGTGTGCAATTGCCA  
TTGCCCTGGGCTATAAAACCATTTATCTGTGCGGTATCGATTTCTATGAAGGCGACGTTAT  
TTATCCGTTTGAAGCAATGAGCACCAACATTAACAATCTTCCCTGGCATCAAAGACTT  
CAAACCGAGCAATTGTCACAGCAAAGAATATGATATTGAGGCCCTGAACTGCTGAAAAG  
CATCTATAAAGTGAACATCTATGCCCTGTGTGATGATAGCATTCTGGCAAATCATTTTCCG  
CTGAGCATTAAACATCAACAACAACCTTTACCCTGGAAAACAAACACAACAGCATCAAT  
GATATCCTGCTGACCGATAATACACCGGGTGTAGCTTTTACAAAAATCAGCTGAAAGCC  
GATAACAAAATTATGCTGAACTTTTTATTAAggtaccctcgaggataaggaggataagATGGAGAAAA  
AATCTCTGCGTGGAGCCATCCGCAGTTCGAAAAAGGATCCCAGAACCATGTTATTAGCC  
TGGCAAGCGCAGCAGAACGTCGTGCACATATTGCAGATACCTTTGGTCGTCATGGTATT  
CCGTTTCAGTTTTTTGATGCACTGATGCCGAGCGAACGTCTGGAACAGGCAATGGCAGA  
ACTGGTTCGGGTCTGAGCGCACATCCGTATCTGAGCGGTGTTGAAAAAGCATGTTTAA  
TGAGCCATGCAGTTCTGTGGAACAGGCACTGGATGAAGGTCTGCCGTATATTACCGTT  
TTTGAAGATGATGTTCTGCTGGGTGAAGGTGCAGAAAAATTTCTGGCAGAAGATGCCTG  
GCTGCAAGAACGTTTTGATCCGGATACCGCATTATTGTTTCGTCTGGAAACCATGTTTAT  
GCATGTTCTGACCAGCCCAGCGGTGTGGCAGATTATTGTGGTCGTGCATTTCCGCTGC

TGGAAAGCGAACATTGGGGCACCGCAGGTTATATCATTAGCCGTAAAGCAATGCGCTTTT  
TTCTGGATCGTTTTGCAGCACTGCCTCCGGAAGGCCCTGCATCCGGTTGATCTGATGATG  
TTTAGCGATTTTTTTGATCGTGAAGGTATGCCGGTTTGTGAGCTGAATCCGGCACTGTGT  
GCACAAGAACTGCACTATGCAAAATTTATGATCAGAATAGCGCACTGGGTAGCCTGATT  
GAACATGATCGTCTGCTGAATCGTAAACAGCAGCGTCGTGATAGTCCGGCAAATACCTTT  
AAACATCGTCTGATTCTGTCGCCCTGACCAAATTTAGCCGTGAACGTGAAAAACGTCTGCA  
GCGTCGCGAACAGTTTATTGTGCCGTTTCAGTAAAtgaaggctagaggagtaaaaATGGAAAAC  
GAGAATAAACCGAACGTGGCAAATTTTGAAGCAGCAGTTGCAGCCAAAGATTATGAAAAA  
GCATGTAGCGAGCTGCTGCTGATTCTGAGCCAGCTGGATAGCAATTTTGGTGGCATTCA  
TGAAATCGAGTTCGAGTACCAGCTCAGCTGCAGGATCTGGAGCAGGAAAAAATTGTGT  
ACTTTTGCACCCGTATGGCGACTGCCATCACCACCCTGTTCTCTGACCCGGTTCTGGAA  
ATCTCCGACCTGGGTGTGCAGCGTTTCTGGTTTATCAGCGTTGGCTGGCGCTGATCTT  
CGCTAGCAGCCCGTTCGTGAACGCAGACCACATCCTGCAGACTTACAACCGTGAACCG  
AACCGCAAAAACCTCCCTGGAAATTCACCTGGACTCTAGCAAGTCCTCTCTGATTAAATTT  
TGCATCCTGTACCTGCCGGAATCTAATGTGAACCTGAATCTGGATGTGATGTGGAACATT  
TCCCCGGAGCTGTGTGCCTCTCTGTGCTTTGCGCTGCAAAGCCCGCGTTTTTGTGGCA  
CCAGCACCGCCTTTAACAAACGCGCGACCATTCTGCAGTGGTTCCCGCGTCATCTGGA  
CCAGCTGAAAAACCTGAACAACATCCCGTCCGCTATCTCTCATGACGTGTATATGCACTG  
TTCTTACGACACCAGCGTTAACAAAGCACGATGTTAAGCGCGCGCTGAATCACGTGATTC  
GTCGCCACATCGAATCCGAATACGGTTGGAAAGATCGTGATGTGGCTCACATCGGTTAT  
CGCAACAACAACCGGTTATGGTCGTTCTGCTGGAACATTTTCATAGCGCGCACTCTATC  
TACCGTACTCACTCTACCAGCATGATCGCCGCGCGCGAACACTTCTATCTGATCGGCCT  
GGGTTCCCCGAGCGTTGACCAGGCCGGTCAGGAGGTTTTTCGATGAATCCACCTGGTA  
GCGGGTGACAACATGAAGCAAAAACCTGGAATTCATTGTTCTGTGTGCGAAAGCAATGG  
TGCGGCAATTTTCTACATGCCGAGCATCGGTATGGATATGACCACCATCTTCGCGTCCAA  
TACCCGTCTGGCGCCGATTGAGGCAATCGCCCTGGGCCACCCGGCGACTACTCACTCC  
GACTTCATTGAATACGTTATCGTGGAAGACGACTACGTCGGCTCTGAGGAATGCTTCTCT  
GAAACCCTGCTGCGTCTGCCGAAAGACGCTCTGCCGTATGTTCCGTCCGCCCTGGCTC  
CGGAGAAAGTTGATTACCTGCTGCGTGAAAACCTGAAGTTGTCAACATCGGTATTGCC  
TCTACCACTATGAAGCTGAACCCGTAATCCTGGAAGCACTGAAGGCCATTCTGACCG  
TGCGAAGGTGAAAGTGCACTTCCACTTCGCACTGGGCCAGTCCAATGGTATCACTCACC  
CTTACGTTGAACGCTTTATCAAATCTTACCTGGGCGACAGCGCTACCGCGCACCCCGCAC  
TCTCCGTACCACCAGTACCTGCGTATTCTGCACAACCTGCGATATGATGGTAAACCCTTTT  
CCGTTTGGTAATACCAATGGTATTATTGACATGGTAACCCTGGGTCTGGTAGGTGTTTGC  
AAAACCGGTGCGGAAGTCCACGAACATATCGATGAAGGCCTGTTCAAACGTCTGGGCC  
TGCCGGAATGGCTGATTGCAAACACCGTGGACGAATACGTGGAACGTGCAGTGCCGCT  
GGCCGAGAACCATCAGGAACGTCTGGAACCTGCGTCGTTACATTATTGAAAACAATGGCC  
TGAACACCCTGTTACCGGCGACCCACGCCCGATGGGTCAGGTGTTCTCTGAAAAACT  
GAACGCATTCTGAAGGAAAACggcggcGACTACAAGGACGATGACGACAAGGGATAAaag  
cttggctgtttggcggatgagagaagatttcagcctgatacagattaaatcagaac

**DNA Sequence of PdST6.NmLgtB.ApNGT in pMAF10 Context:**

ttgctatgccatagcattttatccataagattagcggatcctacctgacgcttttatcgcaactctctactgtttctccataccggtttttt

gggctagcaggaggaattccATGGAGAAAAAATCTGGAGCCATCCGCAGTTCGAAAAAGGCGG  
ATCCGGACTGGTTCGCGTGGTAGCCACATGTGTAATAGCGATAACACCAGCCTGAAAG  
AAACCGTTAGCAGCAATAGCGCAGATGTTGTTGAAACCGAAACCTATCAGCTGACCCCG  
ATTGATGCACCGAGCAGCTTTCTGAGCCATAGCTGGGAACAGACCTGTGGCACCCCGAT  
TCTGAATGAAAGCGATAAACAGGCAATCAGCTTTGATTTTGTGGCACCGGAACTGAAACA  
GGATGAGAAATATTGCTTTACCTTCAAAGGCATTACCGGTGATCATCGTTATATTACCAATA  
CCACCCTGACCGTTGTGGCACCGACCCTGGAAGTTTATATTGATCATGCAAGCCTGCCG  
AGCCTGCAGCAGCTGATTCATATTATTCAGGCCAAAGATGAATATCCGAGCAATCAGCGT  
TTTGTAGCTGGAAACGTGTTACCGTTGATGCAGATAATGCCAACAAACTGAACATTATA  
CCTATCCGCTGAAAGGCAATAATACCAGTCCGGAATGGTTGCAGCAATTGATGAATATG  
CACAGAGCAAAAATCGCCTGAACATCGAGTTTTATACCAATACAGCCCACGTGTTTAATAA  
CCTGCCTCCGATTATTCAGCCGCTGTATAATAACGAGAAAGTGAAAATTAGCCACATCAG  
CCTGTATGATGACGGTAGCAGCGAATATGTTAGCCTGTATCAGTGGAAGATACCCCGAA  
CAAATTGAAACACTGGAAGGTGAAGTTAGCCTGCTGGCAAATTATCTGGCAGGCACCT  
CACCGGATGCTCCGAAAGGTATGGGTAATCGTTATAATTGGCACAAACTGTATGACACCG  
ACTATTACTTTCTGCGCGAAGATTATCTGGATGTTGAAGCAAATCTGCATGATCTGCGTGA  
TTACCTGGGTAGCAGTGCAAAACAAATGCCGTGGGATGAATTTGCAAAACTGAGCGATA  
GCCAGCAGACCCTGTTTCTGGATATTGTTGGTTTTGATAAAGAACAGCTGCAGCAACAGT  
ATAGCCAGAGTCCGCTGCCGAATTTATCTTTACCGGCACCACCACCTGGGCAGGCGGT  
GAAACCAAAGAATATTATGCCCAGCAGCAGGTTAACGTGATTAACAATGCAATTAATGAAA  
CCAGCCCGTACTATCTGGGTAAAGATTATGACCTGTTTTTCAAAGGTCATCCTGCCGGTG  
GTGTGATTAATGATATTATTCTGGGTAGCTTCCCGGATATGATTAACATTCCGGCAAAAATT  
AGCTTCGAGGTTCTGATGATGACCGATATGCTGCCGGATACCGTTGCAGGTATTGCAAG  
CAGTCTGTATTTACAATTCCGGCAGATAAAGTGAACCTTCATTGTTTTTACCAGCAGCGAT  
ACCATTACCGATCGTGAAGAAGCACTGAAAAGTCCGCTGGTTCAGGTTATGCTGACCCT  
GGGTATTGTTAAAGAAAAAGATGTTCTGTTTTGGGCATAAggtaccctcgaggataaggaggataag  
ATGGAGAAAAAATCTCTGCGTGGAGCCATCCGCAGTTCGAAAAAGGATCCCAGAACCA  
TGTTATTAGCCTGGCAAGCGCAGCAGAACGTCGTGCACATATTGCAGATACCTTTGGTC  
GTCATGGTATTCCGTTTTCAGTTTTTGTATGCACTGATGCCGAGCGAACGTCTGGAACAG  
GCAATGGCAGAACTGGTTCCGGGTCTGAGCGCACATCCGTATCTGAGCGGTGTTGAAA  
AAGCATGTTTTATGAGCCATGCAGTTCTGTGGAACAGGCACTGGATGAAGGTCTGCCG  
TATATTACCGTTTTTGAAGATGATGTTCTGCTGGGTGAAGGTGCAGAAAAATTTCTGGCA  
GAAGATGCCTGGCTGCAAGAACGTTTTGATCCGGATACCGCATTTATTGTTCTGCTGGAA  
ACCATGTTTATGCATGTTCTGACCAGCCCGAGCGGTGTGGCAGATTATTGTGGTCTGTC  
ATTTCCGCTGCTGGAAAGCGAACATTGGGGCACCGCAGGTTATATCATTAGCCGTAAG  
CAATGCGCTTTTTTCTGGATCGTTTTGCAGCACTGCCTCCGGAAGGCCTGCATCCGTT  
GATCTGATGATGTTTAGCGATTTTTTGTATCGTGAAGGTATGCCGGTTTGTGAGCTGAATC  
CGGCACTGTGTGCACAAGAACTGCACTATGCAAAATTTATGATCAGAATAGCGCACTG  
GGTAGCCTGATTGAACATGATCGTCTGCTGAATCGTAAACAGCAGCGTCTGTATAGTCC  
GGCAAATACCTTTAAACATCGTCTGATTCGTGCCCTGACCAAATTAGCCGTGAACGTGA  
AAAACGTCGTCAGCGTCGCGAACAGTTTATTGTGCCGTTTTCAGTAAgtaaggctagaggaggta  
aaaATGGAAAACGAGAATAAACCGAACGTGGCAAATTTTGAAGCAGCAGTTGCAGCCAAA  
GATTATGAAAAAGCATGTAGCGAGCTGCTGCTGATTCTGAGCCAGCTGGATAGCAATTTT

GGTGGCATTTCATGAAATCGAGTTCGAGTACCCAGCTCAGCTGCAGGATCTGGAGCAGG  
AAAAAATTGTGTACTTTTGCACCCGTATGGCGACTGCCATCACCACCCTGTTCTCTGACC  
CGGTTCTGAAATCTCCGACCTGGGTGTGCAGCGTTTCCTGGTTTATCAGCGTTGGCTG  
GCGCTGATCTTCGCTAGCAGCCCGTTCGTGAACGCAGACCACATCCTGCAGACTTACAA  
CCGTGAACCGAACC GCAAAAACCTCCCTGGAAATTCACCTGGACTCTAGCAAGTCTCTC  
TGATTAATTTTGCATCCTGTACCTGCCGGAATCTAATGTGAACCTGAATCTGGATGTGAT  
GTGGAACATTTCCCGGAGCTGTGTGCCTCTCTGTGCTTTGCGCTGCAAAGCCCGCGT  
TTTGTGGCACCAGCACCGCCTTTAACAAACGCGCGACCATTCTGCAGTGGTTCCCGC  
GTCATCTGGACCAGCTGAAAAACCTGAACAACATCCCGTCCGCTATCTCTCATGACGTG  
TATATGCACTGTTCTTACGACACCAGCGTTAACAAAGCACGATGTTAAGCGCGCGCTGAAT  
CACGTGATTCGTCGCCACATCGAATCCGAATACGGTTGGAAAGATCGTGATGTGGCTCA  
CATCGGTTATCGCAACAACAACCGGTTATGGTCGTTCTGCTGGAACATTTTCATAGCGC  
GCACTCTATCTACCGTACTCACTCTACCAGCATGATCGCCGCGCGCGAACACTTCTATCT  
GATCGGCCTGGGTTCCCGAGCGTTGACCAGGCCGGTCAGGAGGTTTTCGATGAATTC  
CACCTGGTAGCGGGTGACAACATGAAGCAAAAACCTGGAATTCATTCTGTTCTGTGTGCGA  
AAGCAATGGTGCGGCAATTTTCTACATGCCGAGCATCGGTATGGATATGACCACCATCTT  
CGCGTCCAATACCCGTCTGGCGCCGATTCAGGCAATCGCCCTGGGCCACCCGGCGACT  
ACTCACTCCGACTTCATTGAATACGTTATCGTGGAAGACGACTACGTCGGCTCTGAGGA  
ATGCTTCTCTGAAACCCTGCTGCGTCTGCCGAAAGACGCTCTGCCGTATGTTCCGTCCG  
CCCTGGCTCCGGAGAAAGTTGATTACCTGCTGCGTGAAAACCCTGAAGTTGTCAACATC  
GGTATTGCCTCTACCACTATGAAGCTGAACCCGTA CTTCTGGAAGCACTGAAGGCCAT  
TCGTGACCGTGCGAAGGTGAAAGTGA CTTCCACTTCGCACTGGGCCAGTCCAATGGT  
ATCACTCACCCTTACGTTGAACGCTTTATCAAATCTTACCTGGGCGACAGCGCTACCGCG  
CACCCGCACTCTCCGTACCACCAGTACCTGCGTATTCTGCACAACCTGCGATATGATGGTA  
AACCCTTTTCCGTTTGGTAATACCAATGGTATTATTGACATGGTAACCCTGGGTCTGGTAG  
GTGTTTGCAAACCCGGTGCGGAAGTCCACGAACATATCGATGAAGGCCTGTTCAAACGT  
CTGGGCCTGCCGGAATGGCTGATTGCAAACACCGTGGACGAATACGTGGAACGTGCAG  
TGCGCCTGGCCGAGAACCATCAGGAACGTCTGGAACCTGCGTCGTTACATTATTGAAAAC  
AATGGCCTGAACACCCTGTTACCCGGCGACCCACGCCGATGGGTGAGGTGTTCTCTGG  
AAAACTGAACGCATTCTGAAGGAAAACGGCGGGCGACTACAAGGACGATGACGACAA  
GGGATAAaagccttggctgtttggcggatgagagaagatctcagcctgatacagattaatcagaac

**DNA sequence of pCon.ConNeuA:**

gatgcattgacggctagctcagtcctaggtacagtgctagcgaattcgagctcccgggaggaggaacgATGAGAACAA  
AAATTATTGCGATAATTCCAGCCCGTAGTGGATCTAAAGGGTTGAGAAATAAAAATGCTTT  
GATGCTGATAGATAAACCTCTTCTTGCTTATAACAATTGAAGCTGCCTTGCAGTCAGAAATG  
TTTGAGAAAGTAATTGTGACAACCTGACTCCGAACAGTATGGAGCAATAGCAGAGTCATAT  
GGTGCTGATTTTTTGTGAGACCGGAAGAACTAGCAACTGATAAAGCATCATCATTTGAA  
TTTATAAAACATGCGTTAAGTATATACTGATTATGAGAACCTTTGCTTTATTACAACCAACT  
TCACCCTTTAGAGATTCGACCCATATTATTGAGGCTGTAAAGTTATATCAAACCTTTAGAAAA  
ATACCAATGTGTTGTTTCTGTTACTAGAAGCAATAAGCCATCACAAATAATTAGACCATTAG  
ATGATTACTCGACACTGTCTTTTTTTGACCTTGATTATAGTAAATATAATCGAAACTCAATAG  
TAGAATATCATCCGAATGGAGCTATATTTATAGCTAATAAGCAGCATTATCTTCATACAAAGC

ATTTTTTTGGTCGCTATTCACTAGCTTATATTATGGATAAGGAAAGCTCTTTAGATATAGATG  
ATAGAATGGATTTCGAACTTGCAATTACCATTACGCAAAAAAAAAAATAGACAAAAAATACTT  
TATCAAAACATACATAATAGAATCAATGAGAAACGAAATGAATTTGATAGTGTAAGTGATAT  
AACTTTAATTGGACACTCGCTGTTTGATTATTGGGACGTAAAAAAATAAATGATATAGAAG  
TTAATAACTTAGGTATCGCTGGTATAAACTCGAAGGAGTACTATGAATATATTATTGAGAAA  
GAGCGGATTGTTAATTTTCGGAGAGTTTGTTCATCTTTTTTGGAACTAATGATATAGTTGT  
TAGTGATTGGAAAAAGAAGACACATTGTGGTATTTGAAGAAAACATGCCAGTATATAAAG  
AAGAAAAATGCTGCATCAAAAATTTATTTATTGTTCGGTTCCTCCTGTTTTTGGGCGTATTG  
ATCGAGATAATAGAATAATTAATGATTTAAATTCTTATCTTCGAGAGAATGTAGATTTTGCAG  
AGTTTATTAGCTTGGATCACGTTTTAAAGACTCTTATGGCAATCTAAATAAAATGTATACTT  
ATGATGGCTTACATTTTAATAGTAATGGGTATACAGTATTAGAAAACGAAATAGCGGAGATT  
GTTAAATGActaattaatctagagtcgacctgcaggcatgcaagctggctgttttggcggatgagagaagatttcagcctg  
atacagattaatcagaacgcgagaagcggctgataaaacagaatttcctggcggcagtagcgcgggtgtcccacctgacc  
catgccgaactcagaagtgaacgccgtagcggcatggtagtgtggggtctccccatgcgagagtagggaactgccaggca  
tcaataaaaacgaaaggctcagtcgaaagactgggcctttcgtttatctgtgttgcggtgaacgctctcctgagtaggacaat

**Sequence of pBR322.Fc-6 in Context:**

gaaatgagctgttgacaattaatcatccggctcgataatgtgtggaattgtgagcggataacaatttcacacaggaaacagacc  
ATGGAACCGAAAAGCTGTGATAAAACCCATACCTGTCCGCCTTGTCCGGCACCGGAACT  
GCTGGGTGGTCCGAGCGTTTTTCTGTTTCCGCCTAAACCGAAAGATACCCTGATGATTA  
GCCGTACACCGGAAGTTACCTGTGTTGTTGTTGATGTTAGCCATGAAGATCCGGAAGTG  
AAATTTAACTGGTATGTTGATGGTGTGGAAGTGCATAATGCAAAAACCAAACCGCGTGAA  
GAAGCGACTACCGGAGGTAACTGGACAACAGCGGGAGGACGTGTTGTTAGCGTTCTG  
ACCGTTCTGCATCAGGATTGGCTGAATGGTAAAGAATACAAATGCAAAGTGAGCAACAAA  
GCACTGCCTGCACCGATTGAAAAACCATTAGCAAAGCAAAGGTCAGCCTCGTGAACC  
GCAGGTTTATACCCTGCCTCCGAGCCGTGATGAACTGACCAAAAATCAGGTTAGCCTGA  
CCTGTCTGGTGAAAGTTTTTATCCGAGCGATATTGCAGTTGAATGGGAAAGCAATGGTC  
AGCCGGAAAATAACTATAAAACCACCCCTCCGTTCTGGATAGTGATGGTAGCTTTTTTC  
TGTATAGCAAACCTGACCGTTGATAAAAGCCGTTGGCAGCAGGTAATGTTTTTAGCTGTA  
GCGTTATGCATGAAGCCCTGCATAATCATTATACCAGAAAAGCCTGAGCCTGAGTCCGG  
GTAAAGGTAGCCATCATCATCACCATCATTAAaagcttgctgttttggcggatgagagaagatttcagcctg  
atacagattaatcagaacgcgagaagcggctgataaaacagaatttcctggcggcagtagcgcgggtgtcccacctgacc  
catgccgaactcagaagtgaacgccgtagcggcatggtagtgtggggtctccccatgcgagagtagggaactgccaggca  
tcaataaaaacgaaaggctcagtcgaaagactgggcctttcgtttatctgtgttgcggtgaacgctctcctgagtaggacaat

**Sequence of pBR322.Im7-6 in Context:**

gaaatgagctgttgacaattaatcatccggctcgataatgtgtggaattgtgagcggataacaatttcacacaggaaacagacc  
ATGGAACCTGGAAAATAGTATTAGTGATTACACAGAGGCTGAGTTTGTCAACTTCTTAAGG  
AAATTGAAAAAGAGGCGACTACCGGAGGTAACTGGACAACAGCGGGAGGAGATGTGTT  
AGATGTGTTACTCGAACACTTTGTAAAAATTACTGAGCATCCAGATGGAACGGATCTGAT  
CTATTATCCTAGTGATAATAGAGACGATAGCCCCGAAGGGATTGTCAAGGAAATTAAGAA  
TGGCGAGCTGCTAACGGTAAGCCAGGATTTAAACAGGGCGGATCCCATCACCATCATCA  
CCATTAAaagcttgctgttttggcggatgagagaagatttcagcctgatacagattaatcagaacgcgagaagcggctgta

taaaacagaattgcctggcggcagtagcgcggtgggtcccacctgaccccatgccgaactcagaagtgaaacgccgtagcgc  
cgatggtagtgtgggtctcccatgcgagagtagggaactgccaggcatcaataaacgaaaggctcagtcgaaagactg  
ggccttcgtttatctgttgcggtgaacgctctcctgagtaggacaaat



## Supplementary Information References

1. Martin, R.W. et al. Cell-free protein synthesis from genomically recoded bacteria enables multisite incorporation of noncanonical amino acids. *Nature Communications* **9**, 1203 (2018).
2. Bundy, B.C. & Swartz, J.R. Site-Specific Incorporation of p-Propargyloxyphenylalanine in a Cell-Free Environment for Direct Protein–Protein Click Conjugation. *Bioconjugate chemistry* **21**, 255-263 (2010).
3. Kightlinger, W. et al. Design of glycosylation sites by rapid synthesis and analysis of glycosyltransferases. *Nature Chemical Biology* **14**, 627-635 (2018).
4. Ollis, A.A., Zhang, S., Fisher, A.C. & DeLisa, M.P. Engineered oligosaccharyltransferases with greatly relaxed acceptor-site specificity. *Nature Chemical Biology* **10**, 816-822 (2014).
5. Glasscock, C.J. et al. A flow cytometric approach to engineering *Escherichia coli* for improved eukaryotic protein glycosylation. *Metabolic Engineering* **47**, 488-495 (2018).
6. Valentine, Jenny L. et al. Immunization with Outer Membrane Vesicles Displaying Designer Glycotopes Yields Class-Switched, Glycan-Specific Antibodies. *Cell Chemical Biology* **23**, 655-665 (2016).
7. Naegeli, A. et al. Substrate Specificity of Cytoplasmic N-Glycosyltransferase. *Journal of Biological Chemistry* **289**, 24521-24532 (2014).
8. Schwarz, F., Fan, Y.-Y., Schubert, M. & Aebi, M. Cytoplasmic N-Glycosyltransferase of *Actinobacillus pleuropneumoniae* Is an Inverting Enzyme and Recognizes the NX(S/T) Consensus Sequence. *Journal of Biological Chemistry* **286**, 35267-35274 (2011).
9. Park, J.E., Lee, K.Y., Do, S.I. & Lee, S.S. Expression and characterization of beta-1,4-galactosyltransferase from *Neisseria meningitidis* and *Neisseria gonorrhoeae*. *Journal of biochemistry and molecular biology* **35**, 330-336 (2002).
10. Peng, W. et al. *Helicobacter pylori*  $\beta$ 1,3-N-acetylglucosaminyltransferase for versatile synthesis of type 1 and type 2 poly-LacNAcs on N-linked, O-linked and I-antigen glycans. *Glycobiology* **22**, 1453-1464 (2012).
11. Ramakrishnan, B. & Qasba, P.K. Crystal structure of lactose synthase reveals a large conformational change in its catalytic component, the beta1,4-galactosyltransferase-I. *Journal of Molecular Biology* **310**, 205-218 (2001).
12. Aanensen, D.M., Mavroidi, A., Bentley, S.D., Reeves, P.R. & Spratt, B.G. Predicted Functions and Linkage Specificities of the Products of the *Streptococcus pneumoniae* Capsular Biosynthetic Loci. *Journal of bacteriology* **189**, 7856-7876 (2007).
13. Ban, L. et al. Discovery of glycosyltransferases using carbohydrate arrays and mass spectrometry. *Nature Chemical Biology* **8**, 769-773 (2012).
14. Blixt, O., van Die, I., Norberg, T. & van den Eijnden, D.H. High-level expression of the *Neisseria meningitidis* *IgtA* gene in *Escherichia coli* and characterization of the encoded N-acetylglucosaminyltransferase as a useful catalyst in the synthesis of GlcNAc $\beta$ 1 $\rightarrow$ 3Gal and GalNAc $\beta$ 1 $\rightarrow$ 3Gal linkages. *Glycobiology* **9**, 1061-1071 (1999).
15. Higuchi, Y. et al. A rationally engineered yeast pyruvyltransferase Pvg1p introduces sialylation-like properties in neo-human-type complex oligosaccharide. *Scientific*

- reports* **6**, 26349 (2016).
16. Sun, S., Scheffler, N.K., Gibson, B.W., Wang, J. & Munson Jr., R.S. Identification and Characterization of the N-Acetylglucosamine Glycosyltransferase Gene of *Haemophilus ducreyi*. *Infection and immunity* **70**, 5887-5892 (2002).
  17. Wang, G., Ge, Z., Rasko, D.A. & Taylor, D.E. Lewis antigens in *Helicobacter pylori*: biosynthesis and phase variation. *Molecular Microbiology* **36**, 1187-1196 (2000).
  18. Persson, K. et al. Crystal structure of the retaining galactosyltransferase LgtC from *Neisseria meningitidis* in complex with donor and acceptor sugar analogs. *Nature Structural Biology* **8**, 166 (2001).
  19. Fang, J. et al. Highly Efficient Chemoenzymatic Synthesis of  $\alpha$ -Galactosyl Epitopes with a Recombinant  $\alpha(1\rightarrow3)$ -Galactosyltransferase. *Journal of the American Chemical Society* **120**, 6635-6638 (1998).
  20. Hidari, K.I. et al. Purification and characterization of a soluble recombinant human ST6Gal I functionally expressed in *Escherichia coli*. *Glycoconjugate Journal* **22**, 1-11 (2005).
  21. Yamamoto, T. Marine Bacterial Sialyltransferases. *Marine Drugs* **8**, 2781 (2010).
  22. Chiu, C.P.C. et al. Structural Analysis of the  $\alpha$ -2,3-Sialyltransferase Cst-I from *Campylobacter jejuni* in Apo and Substrate-Analogue Bound Forms. *Biochemistry* **46**, 7196-7204 (2007).
  23. Keys, T.G. et al. A biosynthetic route for polysialylating proteins in *Escherichia coli*. *Metabolic Engineering* **44**, 293-301 (2017).
  24. Kim, D.M. & Swartz, J.R. Efficient production of a bioactive, multiple disulfide-bonded protein using modified extracts of *Escherichia coli*. *Biotechnology and bioengineering* **85**, 122-129 (2004).
